# Supplementary material for: A chiral aldehyde-induced tandem conjugated addition–lactamization reaction for constructing fully substituted pyroglutamic acids
Source: Royal Society of Chemistry journal article supplement (doi:10.1039/d1qo01923f), 2022-01-01

## Supporting Information

*for*

### **Chiral aldehyde induced tandem conjugated addition-lactamization reaction for constructing full-substituted pyroglutamic acids**

Wen-Zhe Wang, Hao-Ran Shen, Jian Liao, Wei Wen\*, Qi-Xiang Guo\*

Key Laboratory of Applied Chemistry of Chongqing Municipality, School of Chemistry and  
Chemical Engineering, Southwest University, Chongqing, 400715, China.

wenwei1989@swu.edu.cn; [qxguo@swu.edu.cn](mailto:qxguo@swu.edu.cn)

### Table of Contents

|                                                                          |           |
|--------------------------------------------------------------------------|-----------|
| <b>1. General data.....</b>                                              | <b>1</b>  |
| <b>2. Reaction condition optimization.....</b>                           | <b>2</b>  |
| <b>3. General procedure for the catalytic asymmetric reaction.....</b>   | <b>3</b>  |
| <b>4. Determination of the absolute configuration.....</b>               | <b>22</b> |
| <b>5. References.....</b>                                                | <b>23</b> |
| <b>6. The spectrums of <sup>1</sup>H NMR and <sup>13</sup>C NMR.....</b> | <b>24</b> |

---

## 1. General data

Solvents for reactions were dried appropriately before use: toluene, THF and Et<sub>2</sub>O were dried by refluxing with sodium and benzophenone as an indicator, CH<sub>2</sub>Cl<sub>2</sub> and CHCl<sub>3</sub> were dried by refluxing with CaH<sub>2</sub>. All other reagents were directly used as purchased from Aladdin, Adamas-beta<sup>®</sup> and Energy Chemical.

Unless otherwise noted, commercial reagents were used as received and all reactions were carried out directly in the air atmosphere. <sup>1</sup>H NMR and <sup>13</sup>C NMR spectra were recorded on Bruker Avance 600 MHz or 400 MHz spectrometer. Chemical shifts (δ) are reported in ppm from tetramethylsilane (TMS) with the solvent resonance as the internal standard. Proton signal multiplicities are given as s (singlet), d (doublet), t (triplet), q (quartet), m (multiplet), br (broad) or a combination of them. J-values are in Hz. HRMS (ESI-Q-TOF) spectra were recorded on Bruker Impact-II mass spectrometer. Enantiomer ratios were determined by HPLC (CHIRALPAK AD-H, IA-H, IF-H, OD-H columns were purchased from Daicel Chemical Industries, LTD). Optical rotations were determined at λ = 589 nm (sodium D line) by using a Rudolph-API automatic polar meter. α,β-unsaturated diester **2**<sup>[1][2]</sup>, chiral aldehydes<sup>[3]</sup> were prepared according to the literature.

## 2. Reaction condition optimization

**Table S1: Additives screening<sup>a</sup>**

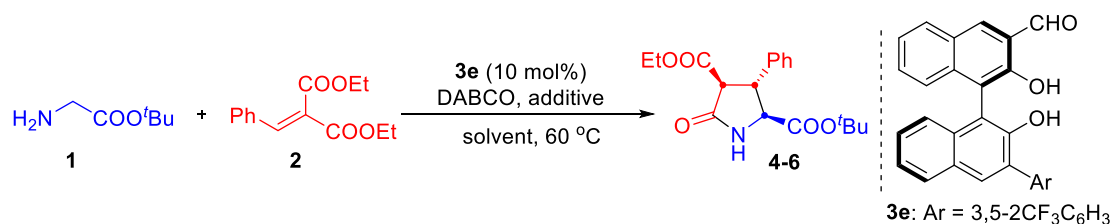

| Entry                 | Additive                                            | Solvent                       | Time(h) | Yield(%) <sup>c</sup> | ee <sup>d</sup> | dr <sup>d</sup> |
|-----------------------|-----------------------------------------------------|-------------------------------|---------|-----------------------|-----------------|-----------------|
| <b>1</b> <sup>b</sup> | LiBr                                                | PhCH <sub>3</sub>             | 16.5    | trace                 |                 |                 |
| <b>2</b> <sup>b</sup> | ZnCl <sub>2</sub>                                   | PhCH <sub>3</sub>             | 16.5    | 55                    | 7               | 92:8            |
| <b>3</b> <sup>b</sup> | Cu(OTf) <sub>2</sub>                                | PhCH <sub>3</sub>             | 16.5    | trace                 |                 |                 |
| <b>4</b> <sup>b</sup> | ZnF <sub>2</sub>                                    | PhCH <sub>3</sub>             | 24      | 61                    | -18             | 79:12           |
| <b>5</b> <sup>b</sup> | ZnBr <sub>2</sub>                                   | PhCH <sub>3</sub>             | 28      | 56                    | -9              | 94:6            |
| <b>6</b> <sup>b</sup> | Zn(OAc) <sub>2</sub>                                | PhCH <sub>3</sub>             | 28      | 68                    | 0               | 62:38           |
| <b>7</b>              | Zn(OAc) <sub>2</sub>                                | C <sub>6</sub> F <sub>6</sub> | 11      | 45                    | 5               | 81:19           |
| <b>8</b>              | AgOAc                                               | C <sub>6</sub> F <sub>6</sub> | 22.5    | 18                    | 53              | 86:14           |
| <b>9</b>              | Ag <sub>2</sub> CO <sub>3</sub>                     | C <sub>6</sub> F <sub>6</sub> | 22.5    | 17                    | 53              | 87:13           |
| <b>10</b>             | Cu(CH <sub>3</sub> CN) <sub>4</sub> PF <sub>6</sub> | C <sub>6</sub> F <sub>6</sub> | 8.5     | N.R.                  |                 |                 |
| <b>11</b>             | Cu(OAc) <sub>2</sub>                                | C <sub>6</sub> F <sub>6</sub> | 8.5     | N.R.                  |                 |                 |
| <b>12</b>             | AgSbF <sub>6</sub>                                  | C <sub>6</sub> F <sub>6</sub> | 23.5    | 44                    | 59              | 90:10           |
| <b>13</b>             | AgBF <sub>4</sub>                                   | C <sub>6</sub> F <sub>6</sub> | 23.5    | 55                    | 61              | 92:8            |
| <b>14</b>             | Zn(OTf) <sub>2</sub>                                | C <sub>6</sub> F <sub>6</sub> | 19.5    | 48                    | 23              | 63:37           |
| <b>15</b>             | NaOAc                                               | C <sub>6</sub> F <sub>6</sub> | 23.5    | 42                    | 67              | 91:9            |

<sup>a</sup> Unless noted otherwise, reactions were performed with **1a** (0.40 mmol), **2a** (0.20 mmol), **3** (0.02 mmol), base (0.25 mmol) and additive (0.06mmol) in solvent (1.0 mL) at 60 °C. <sup>b</sup> base (0.2mmol), additive (0.08mmol), <sup>c</sup> Isolated yield. <sup>d</sup> Determined by chiral HPLC.

**Table S2: Screening of the alkoxy groups of glycines<sup>a</sup>**

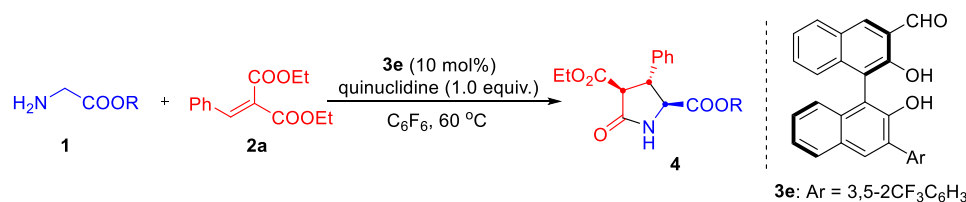

| Entry | R               | Yield(%) <sup>b</sup> | ee <sup>c</sup> | dr <sup>c</sup> |
|-------|-----------------|-----------------------|-----------------|-----------------|
| 1     | Me              | 53                    | 75              | 99:1            |
| 2     | Et              | 68                    | 76              | 98:2            |
| 3     | Bn              | 27                    | 70              | 93:7            |
| 4     | <sup>t</sup> Bu | 83                    | 80              | 90:10           |

<sup>a</sup> Reactions were performed with **1** (0.3 mmol), **2a** (0.2 mmol), **3** (0.02 mmol) and base (0.2 mmol) in C<sub>6</sub>F<sub>6</sub> (1.0 mL) at 60 °C. <sup>b</sup> Isolated yield. <sup>c</sup> Determined by chiral HPLC.

### 3. General procedure for the catalytic asymmetric reaction

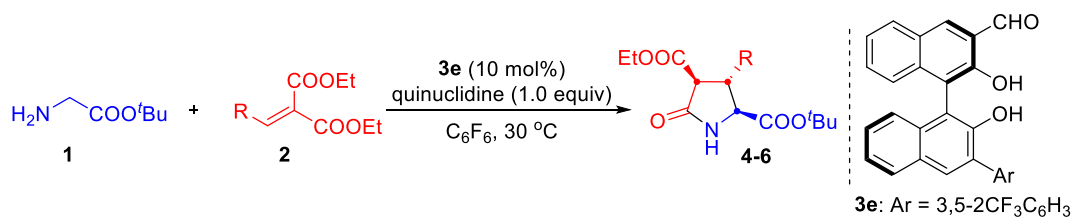

A dry Schlenk tube was charged with  $\alpha,\beta$ -unsaturated diester **2** (0.2 mmol), catalyst **3e** (0.02mmol), Quinuclidine (0.2 mmol) and Glycine tert-butyl ester **1**(0.3 mmol). After the addition of Hexafluorobenzene (1.0 mL), the reaction mixture was effectively stirred at 30 °C and monitored by TLC. After the complete consumption of reactant **2**, the mixture was concentrated in vacuo and purified by flash chromatography on silica gel (petroleum: AcOEt = 5:1 to 1:1) to afford products **4-6**.

#### 2-(tert-butyl) 4-ethyl (2*S*, 3*R*, 4*S*)-5-oxo-3-phenylpyrrolidine-2,4-dicarboxylate (**4a**):

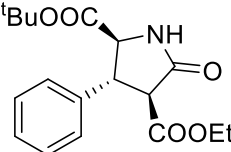 Colorless oil (60.9 mg, 92%);  $R_f$  = 0.23 (petroleum ether/ ethyl acetate = 2:1); the enantiomeric excess was determined to be 86% by HPLC analysis on Daicel Chirapak IA-H column (hexane/isopropanol = 80/20, flow rate 1.0 mL/min, T = 30 °C), UV 220 nm,  $t_R$ (major) 8.578 min,  $t_R$ (minor) 14.228 min;  $[\alpha]_D^{20}$  = -2.99 ( $c$ =1.17,  $\text{CHCl}_3$ );  $^1\text{H NMR}$  (600 MHz,  $\text{CDCl}_3$ )  $\delta$  7.36 (t,  $J$  = 7.5 Hz, 2H), 7.29 (d,  $J$  = 7.4 Hz, 3H), 6.49 (s, 1H), 4.26 – 4.15 (m, 3H), 4.08 (t,  $J$  = 7.9 Hz, 1H), 3.59 (d,  $J$  = 8.6 Hz, 1H), 1.40 (s, 9H), 1.26 (t,  $J$  = 7.1 Hz, 3H).  $^{13}\text{C NMR}$  (151 MHz,  $\text{CDCl}_3$ )  $\delta$  170.62, 169.14, 168.20, 139.74, 129.02, 127.82, 127.44, 82.96, 61.98, 61.27, 56.06, 47.99, 27.91, 14.11. **HRMS(ESI)**  $m/z$ :  $[\text{M}+\text{H}]^+$  Calculated for  $\text{C}_{18}\text{H}_{24}\text{NO}_5^+$  334.1649; found 334.1648.

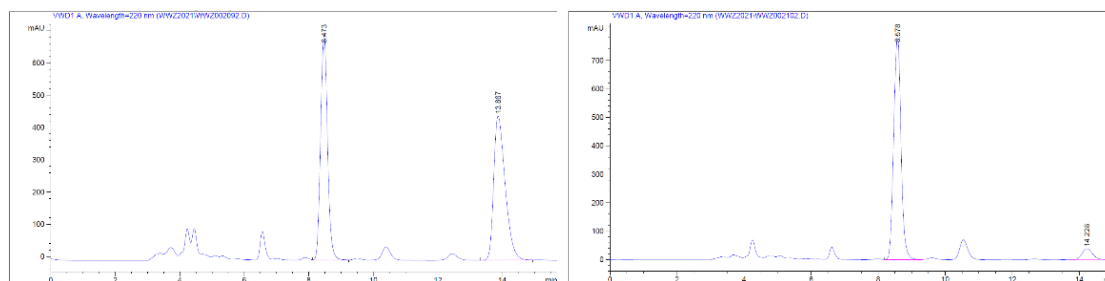

| Peak # | RetTime [min] | Type | Width [min] | Area [mAU*s] | Height [mAU] | Area %  | Peak # | RetTime [min] | Type | Width [min] | Area [mAU*s] | Height [mAU] | Area %  |
|--------|---------------|------|-------------|--------------|--------------|---------|--------|---------------|------|-------------|--------------|--------------|---------|
| 1      | 8.473         | VV   | 0.2349      | 1.04700e4    | 697.29956    | 48.8086 | 1      | 8.578         | VV   | 0.2375      | 1.19244e4    | 789.05347    | 93.0687 |
| 2      | 13.867        | BB   | 0.3785      | 1.09811e4    | 446.94687    | 51.1914 | 2      | 14.228        | BBA  | 0.3469      | 888.07953    | 39.49487     | 6.9313  |

## 2-(tert-butyl) 4-ethyl (2S, 3R, 4S)-3-(2-nitrophenyl)-5-oxopyrrolidine-2,4-dicarboxylate (4b):

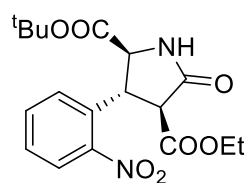

Yellow oil (53.0 mg, 70%);  $R_f = 0.12$  (petroleum ether/ ethyl acetate = 2:1); the enantiomeric excess was determined to be 88% by HPLC analysis on Daicel Chirapak AD-H column (hexane/isopropanol = 70/30, flow rate 1.0 mL/min,  $T = 30\text{ }^\circ\text{C}$ ), UV 220 nm,  $t_R(\text{major})$  9.891 min,  $t_R(\text{minor})$  18.391 min;  $[\alpha]_D^{20} = -58.48$  ( $c=0.56$   $\text{CHCl}_3$ );  $^1\text{H NMR}$  (600 MHz,  $\text{CDCl}_3$ )  $\delta$  7.91 (d,  $J = 8.1$  Hz, 1H), 7.67 (t,  $J = 7.4$  Hz, 1H), 7.56 (d,  $J = 7.7$  Hz, 1H), 7.48 (t,  $J = 7.7$  Hz, 1H), 7.08 (s, 1H), 4.67 (t,  $J = 6.3$  Hz, 1H), 4.24 (m,  $J = 12.1, 5.2$  Hz, 3H), 3.58 (d,  $J = 7.0$  Hz, 1H), 1.41 (s, 9H), 1.28 (t,  $J = 7.2$  Hz, 3H).  $^{13}\text{C NMR}$  (151 MHz,  $\text{CDCl}_3$ )  $\delta$  170.47, 168.74, 167.62, 149.49, 134.94, 133.69, 129.17, 128.79, 124.99, 83.47, 62.23, 60.91, 56.03, 42.61, 27.76, 14.03. HRMS(ESI)  $m/z$ :  $[\text{M}+\text{H}]^+$  Calculated for  $\text{C}_{18}\text{H}_{23}\text{N}_2\text{O}_7^+$  379.1500; found 379.1492.

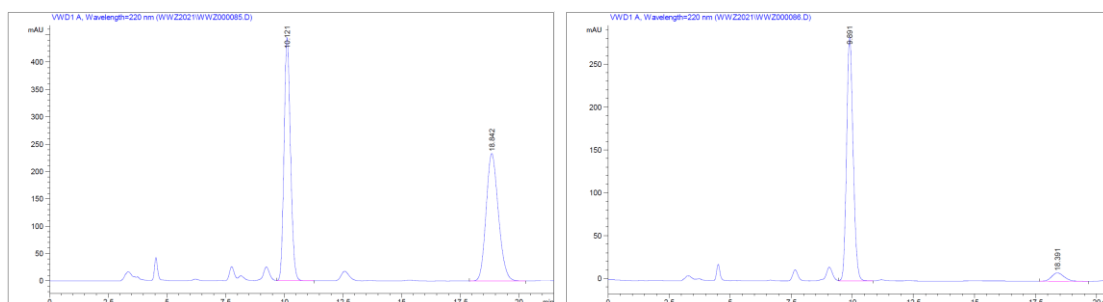

| Peak # | RetTime [min] | Type | Width [min] | Area [mAU*s] | Height [mAU] | Area %  | Peak # | RetTime [min] | Type | Width [min] | Area [mAU*s] | Height [mAU] | Area %  |
|--------|---------------|------|-------------|--------------|--------------|---------|--------|---------------|------|-------------|--------------|--------------|---------|
| 1      | 10.121        | VB   | 0.2909      | 8418.25684   | 444.50644    | 49.8772 | 1      | 9.891         | VB   | 0.2868      | 5272.70264   | 283.72049    | 93.7623 |
| 2      | 18.842        | BB   | 0.5631      | 8459.69238   | 233.21579    | 50.1228 | 2      | 18.391        | BB   | 0.5463      | 350.77823    | 9.82360      | 6.2377  |

## 2-(tert-butyl) 4-ethyl (2S, 3R, 4S)-3-(2-(diphenylphosphanyl)phenyl)-5-oxopyrrolidine-2,4-dicarboxylate (4c):

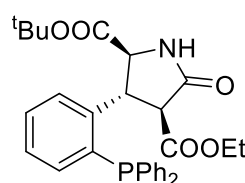

Colorless oil (101.9 mg, 81%);  $R_f = 0.14$  (petroleum ether/ ethyl acetate = 2:1); the enantiomeric excess was determined to be 85% by HPLC analysis on Daicel Chirapak IA-H column (hexane/isopropanol = 90/10, flow rate 1.0 mL/min,  $T = 30\text{ }^\circ\text{C}$ ), UV 220 nm,  $t_R(\text{major})$  21.684 min,  $t_R(\text{minor})$  37.276 min;  $[\alpha]_D^{20} = 6.81$  ( $c=1.73$   $\text{CHCl}_3$ );  $^1\text{H NMR}$  (600 MHz,  $\text{CDCl}_3$ )  $\delta$  7.40 – 7.35 (m, 2H), 7.34 – 7.29 (m, 6H), 7.23 – 7.15 (m, 5H), 6.95 (dd,  $J = 7.6, 3.7$  Hz, 1H), 6.47 (s, 1H), 5.09 (s, 1H), 4.30 (d,  $J = 3.7$  Hz, 1H), 3.93 – 3.80 (m, 2H), 3.27 (s, 1H), 1.46 (s, 9H), 1.11 (t,  $J = 7.1$  Hz, 3H).  $^{13}\text{C NMR}$  (151 MHz,  $\text{CDCl}_3$ )  $\delta$  171.68, 169.43, 167.57, 136.71, 136.63, 136.28, 136.21, 135.89, 135.79, 134.64, 133.88, 133.79, 133.75, 133.66, 130.25, 128.80, 128.75, 128.66,

128.62, 128.61, 128.58, 127.83, 126.52, 82.84, 62.39, 62.36, 61.66, 56.52, 28.00, 13.92.

**HRMS(ESI) m/z:**  $[M+H]^+$  Calculated for  $C_{30}H_{33}NO_5P^+$  518.2091; found 518.2089.

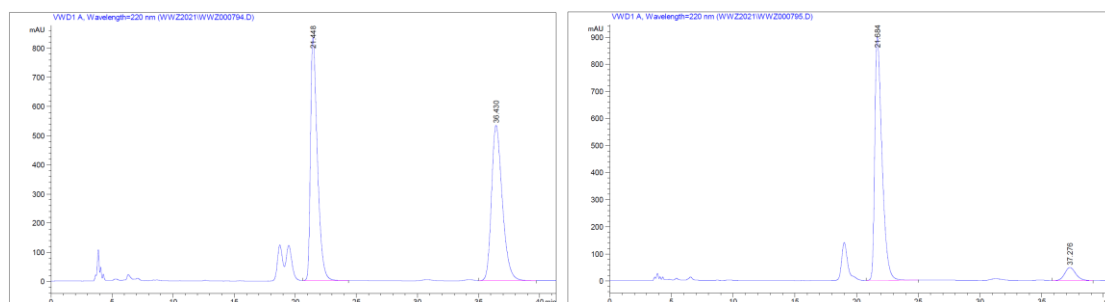

| Peak # | RetTime [min] | Type | Width [min] | Area [mAU*s] | Height [mAU] | Area %  | Peak # | RetTime [min] | Type | Width [min] | Area [mAU*s] | Height [mAU] | Area %  |
|--------|---------------|------|-------------|--------------|--------------|---------|--------|---------------|------|-------------|--------------|--------------|---------|
| 1      | 21.448        | BB   | 0.5931      | 3.26669e4    | 832.90161    | 49.9918 | 1      | 21.684        | BB   | 0.6099      | 3.63922e4    | 897.94055    | 92.5399 |
| 2      | 36.430        | BB   | 0.9400      | 3.26776e4    | 532.83392    | 50.0082 | 2      | 37.276        | BB   | 0.9413      | 2933.73462   | 47.84678     | 7.4601  |

**2-(tert-butyl) 4-ethyl (2S, 3R, 4S)-5-oxo-3-(m-tolyl)pyrrolidine-2,4-dicarboxylate (4d):**

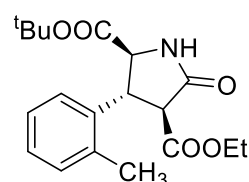

Colorless oil (22.0 mg, 32%);  $R_f = 0.28$  (petroleum ether/ ethyl acetate = 2:1); the enantiomeric excess was determined to be 88% by HPLC analysis on Daicel Chirapak AD-H column (hexane/isopropanol = 90/10, flow rate 1.0 mL/min,  $T = 30\text{ }^\circ\text{C}$ ),  $t_R(\text{major})$  10.083 min,

$t_R(\text{minor})$  20.534 min;  $[\alpha]_D^{20} = -22.43$  ( $c=0.44$   $\text{CHCl}_3$ );  $^1\text{H NMR}$  (600 MHz,  $\text{CDCl}_3$ )  $\delta$  7.22 (d,  $J = 1.3$  Hz, 2H), 7.18 (d,  $J = 1.5$  Hz, 2H), 6.42 (s, 1H), 4.45 (t,  $J = 6.5$  Hz, 1H), 4.25 – 4.18 (m, 2H), 4.14 (d,  $J = 5.9$  Hz, 1H), 3.51 (d,  $J = 7.2$  Hz, 1H), 2.44 (s, 3H), 1.43 (s, 9H), 1.27 (t,  $J = 7.1$  Hz, 3H).  $^{13}\text{C NMR}$  (151 MHz,  $\text{CDCl}_3$ )  $\delta$  170.93, 169.32, 168.40, 139.05, 136.22, 130.73, 127.43, 126.90, 125.83, 82.92, 62.00, 61.93, 56.29, 42.71, 27.88, 19.76, 14.09. **HRMS(ESI) m/z:**  $[M+H]^+$  Calculated for  $C_{19}H_{26}NO_5^+$  348.1805; found 348.1804.

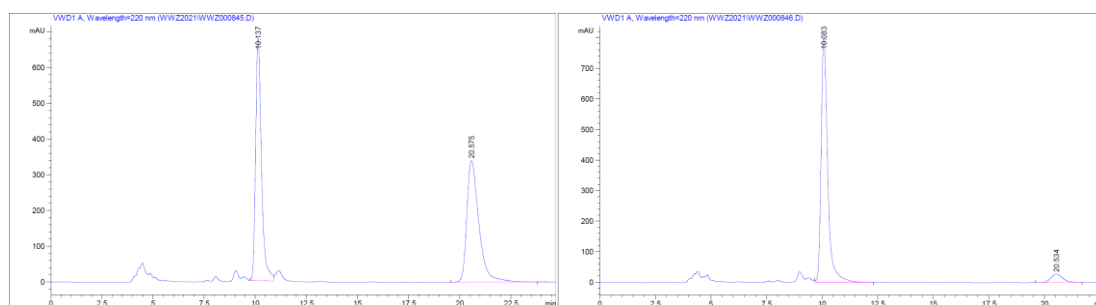

| Peak # | RetTime [min] | Type | Width [min] | Area [mAU*s] | Height [mAU] | Area %  | Peak # | RetTime [min] | Type | Width [min] | Area [mAU*s] | Height [mAU] | Area %  |
|--------|---------------|------|-------------|--------------|--------------|---------|--------|---------------|------|-------------|--------------|--------------|---------|
| 1      | 10.137        | BV   | 0.3015      | 1.34508e4    | 677.75299    | 49.1016 | 1      | 10.083        | VB   | 0.3106      | 1.63506e4    | 797.69763    | 94.2049 |
| 2      | 20.575        | BB   | 0.6195      | 1.39430e4    | 340.24435    | 50.8984 | 2      | 20.534        | BB   | 0.5601      | 1005.82281   | 27.45516     | 5.7951  |

**2-(tert-butyl) 4-ethyl (2S, 3R, 4S)-3-(3-nitrophenyl)-5-oxopyrrolidine-2,4-dicarboxylate (4e):**

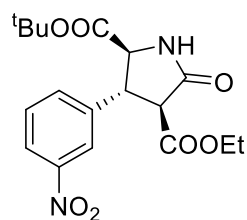

Colorless oil (52.4 mg, 69%);  $R_f = 0.18$  (petroleum ether/ ethyl acetate = 2:1); the enantiomeric excess was determined to be 77% by HPLC analysis on Daicel Chirapak AD-H column (hexane/isopropanol = 70/30, flow rate 1.0 mL/min,  $T = 30\text{ }^\circ\text{C}$ ), UV 220 nm,  $t_R$ (major) 8.302 min,  $t_R$ (minor) 13.596 min;  $[\alpha]_D^{20} = -11.83$  ( $c=1.05$   $\text{CHCl}_3$ );  $^1\text{H NMR}$  (600 MHz,  $\text{CDCl}_3$ )  $\delta$  8.23 (s, 1H), 8.19 (d,  $J = 8.1$  Hz, 1H), 7.69 (d,  $J = 7.6$  Hz, 1H), 7.58 (t,  $J = 7.9$  Hz, 1H), 7.01 (bs, 1H), 4.28 – 4.19 (m, 4H), 3.65 (d,  $J = 8.9$  Hz, 1H), 1.41 (s, 9H), 1.27 (t,  $J = 7.1$  Hz, 3H).  $^{13}\text{C NMR}$  (151 MHz,  $\text{CDCl}_3$ )  $\delta$  169.85, 168.52, 167.67, 148.61, 141.54, 133.84, 130.09, 122.91, 122.68, 83.56, 62.26, 60.74, 55.72, 47.40, 27.87, 14.07. **HRMS(ESI)**  $m/z$ :  $[\text{M}+\text{H}]^+$  Calculated for  $\text{C}_{18}\text{H}_{23}\text{N}_2\text{O}_7^+$  379.1500; found 379.1493.

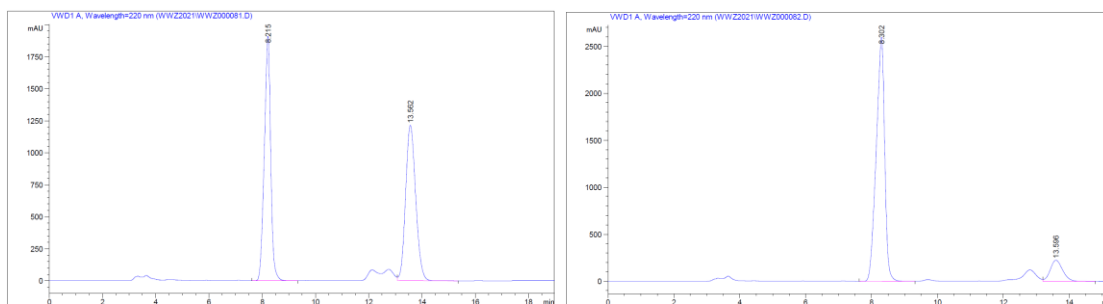

| Peak # | RetTime [min] | Type | Width [min] | Area [mAU*s] | Height [mAU] | Area %  | Peak # | RetTime [min] | Type | Width [min] | Area [mAU*s] | Height [mAU] | Area %  |
|--------|---------------|------|-------------|--------------|--------------|---------|--------|---------------|------|-------------|--------------|--------------|---------|
| 1      | 8.215         | BB   | 0.2499      | 3.18497e4    | 1910.25952   | 49.8122 | 1      | 8.302         | BB   | 0.2678      | 4.62743e4    | 2595.36841   | 88.7357 |
| 2      | 13.562        | VB   | 0.4101      | 3.20888e4    | 1215.18848   | 50.1878 | 2      | 13.596        | VB   | 0.4025      | 5874.16016   | 224.80803    | 11.2643 |

#### 2-(tert-butyl) 4-ethyl (2S, 3R, 4S)-3-(3-fluorophenyl)-5-oxopyrrolidine-2,4-dicarboxylate (4f):

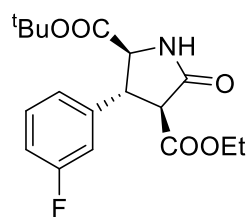

Colorless oil (55.8 mg, 79%);  $R_f = 0.24$  (petroleum ether/ ethyl acetate = 2:1); the enantiomeric excess was determined to be 83% by HPLC analysis on Daicel Chirapak AD-H column (hexane/isopropanol = 70/30, flow rate 1.0 mL/min,  $T = 30\text{ }^\circ\text{C}$ ), UV 220 nm,  $t_R$ (major) 7.017 min,  $t_R$ (minor) 11.749 min;  $[\alpha]_D^{20} = 10.91$  ( $c=1.01$   $\text{CHCl}_3$ );  $^1\text{H NMR}$  (600 MHz,  $\text{CDCl}_3$ )  $\delta$  7.33 (dd,  $J = 14.2, 7.3$  Hz, 1H), 7.08 (d,  $J = 7.6$  Hz, 1H), 7.00 (t,  $J = 9.3$  Hz, 2H), 6.35 (s, 1H), 4.26 – 4.19 (m, 2H), 4.16 (d,  $J = 7.3$  Hz, 1H), 4.08 (t,  $J = 8.0$  Hz, 1H), 3.56 (d,  $J = 8.8$  Hz, 1H), 1.41 (s, 9H), 1.27 (t,  $J = 7.1$  Hz, 3H).  $^{13}\text{C NMR}$  (151 MHz,  $\text{CDCl}_3$ )  $\delta$  170.18, 168.82, 167.93, 163.81, 162.17, 142.08, 142.03, 130.64, 130.58, 123.09, 123.07, 114.88, 114.74, 114.67, 114.53, 83.20, 62.10, 60.91, 55.85, 47.57, 27.88, 14.09. **HRMS(ESI)**  $m/z$ :  $[\text{M}+\text{H}]^+$  Calculated for  $\text{C}_{18}\text{H}_{23}\text{FNO}_5^+$  352.1555; found 352.1557.

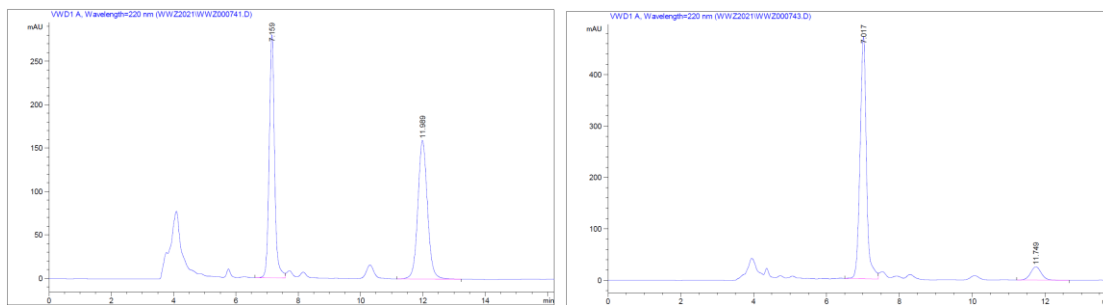

| Peak # | RetTime [min] | Type | Width [min] | Area [mAU*s] | Height [mAU] | Area %  | Peak # | RetTime [min] | Type | Width [min] | Area [mAU*s] | Height [mAU] | Area %  |
|--------|---------------|------|-------------|--------------|--------------|---------|--------|---------------|------|-------------|--------------|--------------|---------|
| 1      | 7.159         | BV   | 0.1807      | 3317.23828   | 279.53564    | 49.2955 | 1      | 7.017         | BV   | 0.1878      | 5753.46240   | 470.63455    | 91.5401 |
| 2      | 11.989        | BB   | 0.3285      | 3412.05078   | 159.39531    | 50.7045 | 2      | 11.749        | VB   | 0.3158      | 531.71790    | 26.00116     | 8.4599  |

**2-(tert-butyl) 4-ethyl (2*S*, 3*R*, 4*S*)-5-oxo-3-(3-(trifluoromethyl)phenyl)pyrrolidine-2,4-dicarboxylate (4g):**

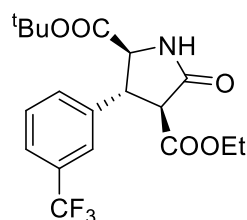

White solid (55.2 mg, 69%);  $R_f = 0.29$  (petroleum ether/ ethyl acetate = 2:1); the enantiomeric excess was determined to be 72% by HPLC analysis on Daicel Chirapak AD-H column (hexane/isopropanol = 90/10, flow rate 1.0 mL/min,  $T = 30\text{ }^\circ\text{C}$ ), UV 220 nm,  $t_R(\text{major})$  10.509 min,

$t_R(\text{minor})$  19.574 min;  $[\alpha]_D^{20} = -18.79$  ( $c=1.08$   $\text{CHCl}_3$ );  $^1\text{H NMR}$  (600 MHz,  $\text{CDCl}_3$ )  $\delta$  7.61 – 7.55 (m, 2H), 7.52 (s, 2H), 6.75 (s, 1H), 4.27 – 4.18 (m, 3H), 4.14 (t,  $J = 8.2$  Hz, 1H), 3.60 (d,  $J = 9.0$  Hz, 1H), 1.40 (s, 9H), 1.27 (t,  $J = 7.1$  Hz, 3H).  $^{13}\text{C NMR}$  (151 MHz,  $\text{CDCl}_3$ )  $\delta$  170.18, 168.75, 167.84, 140.55, 131.48, 131.26, 130.76, 129.61, 124.74, 124.71, 124.64, 124.61, 83.29, 62.15, 60.94, 55.84, 47.65, 27.82, 14.04. **HRMS(ESI)**  $m/z$ :  $[\text{M}+\text{H}]^+$  Calculated for  $\text{C}_{19}\text{H}_{23}\text{F}_3\text{NO}_5^+$  402.1523; found 402.1527.

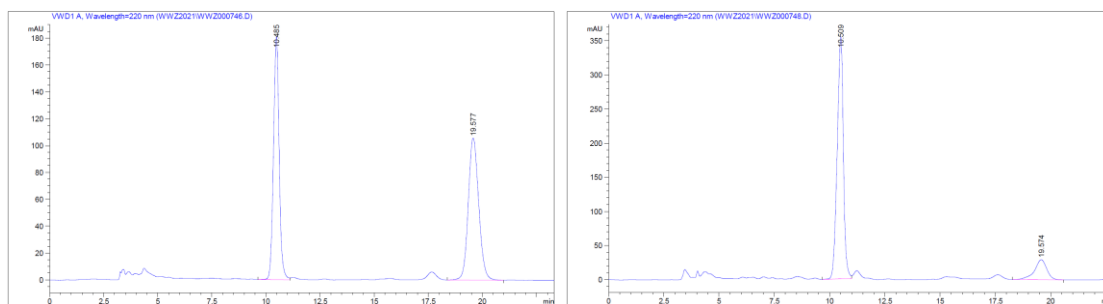

| Peak # | RetTime [min] | Type | Width [min] | Area [mAU*s] | Height [mAU] | Area %  | Peak # | RetTime [min] | Type | Width [min] | Area [mAU*s] | Height [mAU] | Area %  |
|--------|---------------|------|-------------|--------------|--------------|---------|--------|---------------|------|-------------|--------------|--------------|---------|
| 1      | 10.485        | BV   | 0.2767      | 3273.09570   | 180.84990    | 48.0959 | 1      | 10.509        | BV   | 0.2984      | 6901.76563   | 354.79590    | 86.0881 |
| 2      | 19.577        | BB   | 0.5175      | 3532.25586   | 105.88844    | 51.9041 | 2      | 19.574        | BB   | 0.5706      | 1115.32922   | 29.22320     | 13.9119 |

**2-(tert-butyl) 4-ethyl (2*S*, 3*R*, 4*S*)-3-(3-bromophenyl)-5-oxopyrrolidine-2,4-dicarboxylate (4h):**



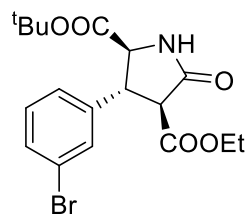

Light yellow oil (63.7 mg, 77%);  $R_f = 0.28$  (petroleum ether/ ethyl acetate = 2:1); the enantiomeric excess was determined to be 85% by HPLC analysis on Daicel Chirapak AD-H column (hexane/isopropanol = 70/30, flow rate 1.0 mL/min,  $T = 30\text{ }^\circ\text{C}$ ), UV 220 nm,  $t_R$ (major) 5.859 min,  $t_R$ (minor) 9.544 min;  $[\alpha]_D^{20} = -15.62$  ( $c=1.27$   $\text{CHCl}_3$ );  $^1\text{H NMR}$  (600 MHz,  $\text{CDCl}_3$ )  $\delta$  7.46 (s, 1H), 7.44 (s, 1H), 7.24 (d,  $J = 4.6$  Hz, 2H), 6.92 (s, 1H), 4.26 – 4.18 (m, 2H), 4.16 (d,  $J = 7.3$  Hz, 1H), 4.04 (t,  $J = 8.1$  Hz, 1H), 3.58 (d,  $J = 8.8$  Hz, 1H), 1.42 (s, 9H), 1.27 (t,  $J = 7.1$  Hz, 3H).  $^{13}\text{C NMR}$  (151 MHz,  $\text{CDCl}_3$ )  $\delta$  170.34, 168.83, 167.91, 141.89, 130.96, 130.80, 130.56, 126.07, 122.92, 83.19, 62.09, 61.05, 55.79, 47.44, 27.89, 14.09. **HRMS(ESI)**  $m/z$ :  $[\text{M}+\text{H}]^+$  Calculated for  $\text{C}_{18}\text{H}_{23}\text{BrNO}_5^+$  412.0754; found 412.0735.

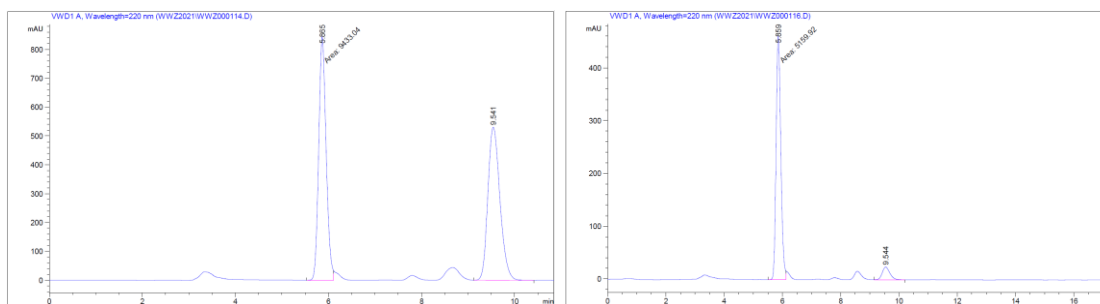

| Peak # | RetTime [min] | Type | Width [min] | Area [mAU*s] | Height [mAU] | Area %  | Peak # | RetTime [min] | Type | Width [min] | Area [mAU*s] | Height [mAU] | Area %  |
|--------|---------------|------|-------------|--------------|--------------|---------|--------|---------------|------|-------------|--------------|--------------|---------|
| 1      | 5.865         | MF   | 0.1864      | 9433.04297   | 843.53589    | 49.7616 | 1      | 5.859         | MF   | 0.1866      | 5159.91650   | 460.99374    | 92.2122 |
| 2      | 9.541         | VB   | 0.2779      | 9523.43066   | 530.53986    | 50.2384 | 2      | 9.544         | VB   | 0.2762      | 435.78058    | 24.14233     | 7.7878  |

### 2-(tert-butyl) 4-ethyl (2S, 3R, 4S)-5-oxo-3-(m-tolyl)pyrrolidine-2,4-dicarboxylate (4i):

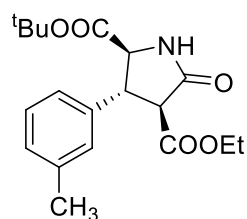

Colorless oil (36.8 mg, 53%);  $R_f = 0.23$  (petroleum ether/ ethyl acetate = 2:1); the enantiomeric excess was determined to be 88% by HPLC analysis on Daicel Chirapak AD-H column (hexane/isopropanol = 80/20, flow rate 1.0 mL/min,  $T = 30\text{ }^\circ\text{C}$ ), UV 220 nm,  $t_R$ (major) 7.381 min,  $t_R$ (minor) 13.450 min;  $[\alpha]_D^{20} = -14.88$  ( $c=0.80$   $\text{CHCl}_3$ );  $^1\text{H NMR}$  (600 MHz,  $\text{CDCl}_3$ )  $\delta$  7.25 (m,  $J = 14.3$ , 6.9 Hz, 1H), 7.10 (t,  $J = 9.4$  Hz, 3H), 6.56 (s, 1H), 4.22 (m,  $J = 16.7$ , 9.3 Hz, 2H), 4.16 (d,  $J = 6.9$  Hz, 1H), 4.04 (t,  $J = 7.5$  Hz, 1H), 3.59 (d,  $J = 8.4$  Hz, 1H), 2.35 (s, 3H), 1.42 (s, 9H), 1.26 (t,  $J = 6.9$  Hz, 3H).  $^{13}\text{C NMR}$  (151 MHz,  $\text{CDCl}_3$ )  $\delta$  170.85, 169.23, 168.27, 139.81, 138.64, 128.86, 128.49, 128.15, 124.37, 82.84, 61.90, 61.43, 56.01, 47.80, 27.89, 21.38, 14.08. **HRMS(ESI)**  $m/z$ :  $[\text{M}+\text{H}]^+$  Calculated for  $\text{C}_{19}\text{H}_{26}\text{NO}_5^+$  348.1805; found 348.1804.

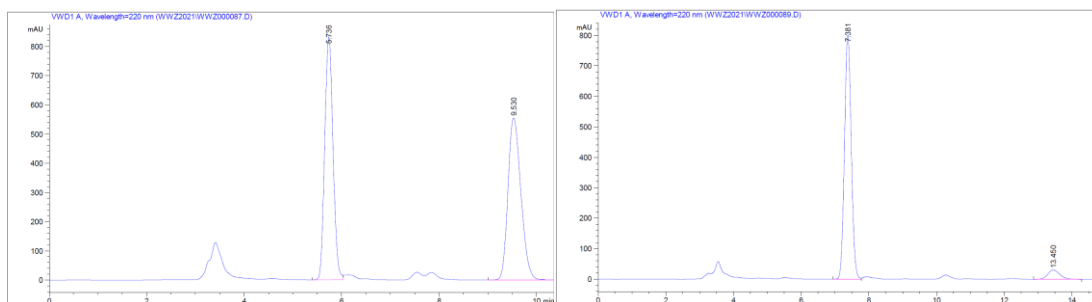

| Peak # | RetTime [min] | Type | Width [min] | Area [mAU*s] | Height [mAU] | Area %  | Peak # | RetTime [min] | Type | Width [min] | Area [mAU*s] | Height [mAU] | Area %  |
|--------|---------------|------|-------------|--------------|--------------|---------|--------|---------------|------|-------------|--------------|--------------|---------|
| 1      | 5.736         | BV   | 0.1860      | 9827.29004   | 931.69629    | 49.0915 | 1      | 7.381         | BV   | 0.2185      | 1.11937e4    | 800.55219    | 93.8656 |
| 2      | 9.530         | BBA  | 0.2888      | 1.01910e4    | 554.48383    | 50.9085 | 2      | 13.450        | BB   | 0.3790      | 731.53729    | 30.02799     | 6.1344  |

**2-(tert-butyl) 4-ethyl (2*S*, 3*R*, 4*S*)-5-oxo-3-(3-(trifluoromethoxy)phenyl)pyrrolidine-2,4-dicarboxylate (4j):**

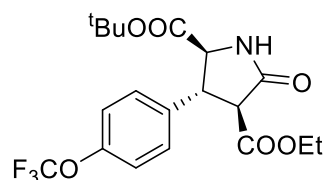

Colorless oil (65.3 mg, 78%);  $R_f = 0.24$  (petroleum ether/ ethyl acetate = 2:1); the enantiomeric excess was determined to be 83% by HPLC analysis on Daicel Chirapak AD-H column (hexane/isopropanol = 90/10, flow rate 1.0 mL/min,  $T = 30\text{ }^\circ\text{C}$ ), UV 220 nm,  $t_R(\text{major})$  16.640 min,  $t_R(\text{minor})$  24.175 min;  $[\alpha]_D^{20} = -10.77$  ( $c=1.31$   $\text{CHCl}_3$ );  $^1\text{H NMR}$  (600 MHz,  $\text{CDCl}_3$ )  $\delta$  7.34 (d,  $J = 8.5$  Hz, 2H), 7.22 (d,  $J = 8.1$  Hz, 2H), 6.49 (s, 1H), 4.22 (dddd,  $J = 17.9, 10.8, 7.2, 3.7$  Hz, 2H), 4.15 (d,  $J = 7.4$  Hz, 1H), 4.10 (t,  $J = 8.1$  Hz, 1H), 3.56 (d,  $J = 8.8$  Hz, 1H), 1.40 (s, 9H), 1.27 (t,  $J = 7.1$  Hz, 3H).  $^{13}\text{C NMR}$  (151 MHz,  $\text{CDCl}_3$ )  $\delta$  170.15, 168.77, 167.91, 148.73, 138.22, 128.96, 121.49, 121.28, 119.57, 83.24, 62.13, 61.01, 55.91, 47.27, 27.86, 14.08. **HRMS(ESI)**  $m/z$ :  $[\text{M}+\text{H}]^+$  Calculated for  $\text{C}_{19}\text{H}_{23}\text{F}_3\text{NO}_6^+$  418.1472; found 418.1469.

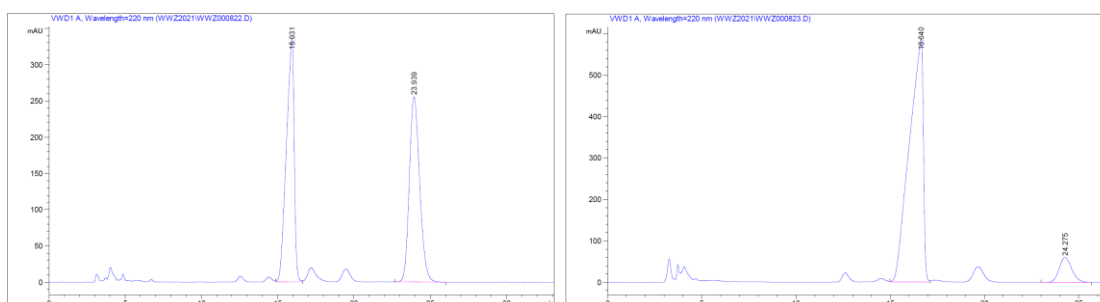

| Peak # | RetTime [min] | Type | Width [min] | Area [mAU*s] | Height [mAU] | Area %  | Peak # | RetTime [min] | Type | Width [min] | Area [mAU*s] | Height [mAU] | Area %  |
|--------|---------------|------|-------------|--------------|--------------|---------|--------|---------------|------|-------------|--------------|--------------|---------|
| 1      | 15.931        | VV   | 0.5784      | 1.18910e4    | 335.34256    | 49.6820 | 1      | 16.640        | VV   | 0.9145      | 3.02009e4    | 586.16779    | 91.5461 |
| 2      | 23.939        | BB   | 0.7350      | 1.20432e4    | 255.52702    | 50.3180 | 2      | 24.275        | BB   | 0.7227      | 2788.92554   | 59.88020     | 8.4539  |

**2-(tert-butyl) 4-ethyl (2*S*, 3*R*, 4*S*)-3-(4-nitrophenyl)-5-oxopyrrolidine-2,4-dicarboxylate (4k):**

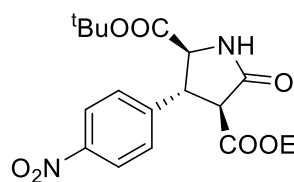

Colorless oil (62.8 mg, 83%);  $R_f = 0.14$  (petroleum ether/ ethyl acetate = 2:1); the enantiomeric excess was determined to be 77% by HPLC analysis on Daicel Chirapak AD-H column (hexane/isopropanol = 70/30, flow rate 1.0 mL/min,  $T = 30\text{ }^\circ\text{C}$ ), UV 220 nm,  $t_R(\text{major})$  11.763 min,  $t_R(\text{minor})$  23.507 min;  $[\alpha]_D^{20} = -6.95$  ( $c=1.25$   $\text{CHCl}_3$ );  $^1\text{H NMR}$  (600 MHz,  $\text{CDCl}_3$ )  $\delta$  8.25 (d,  $J = 8.6$  Hz, 2H), 7.51 (d,  $J = 8.6$  Hz, 2H), 6.63 (s, 1H), 4.30 – 4.15 (m, 4H), 3.59 (dd,  $J = 6.0, 3.0$  Hz, 1H), 1.41 (s, 9H), 1.27 (t,  $J = 7.1$  Hz, 3H).  $^{13}\text{C NMR}$  (151 MHz,  $\text{CDCl}_3$ )  $\delta$  169.55, 168.38, 167.57, 147.59, 146.69, 128.60, 124.28, 83.69, 62.35, 60.47, 55.66, 47.46, 27.90, 14.09. **HRMS(ESI)**  $m/z$ :  $[\text{M}+\text{H}]^+$  Calculated for  $\text{C}_{18}\text{H}_{23}\text{N}_2\text{O}_7^+$  379.1500; found 379.1497.

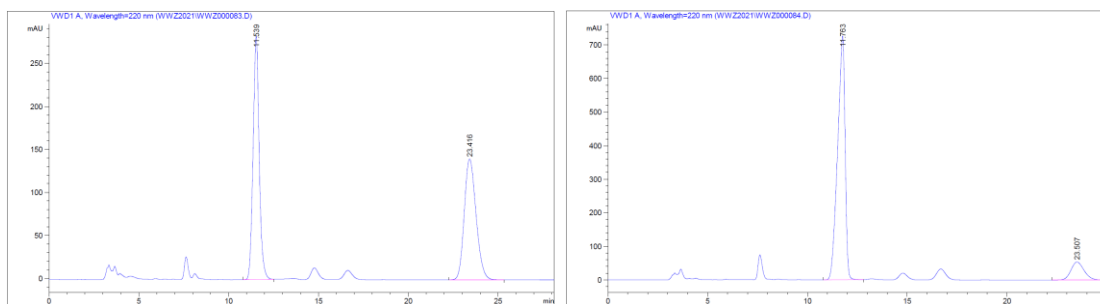

| Peak # | RetTime [min] | Type | Width [min] | Area [mAU*s] | Height [mAU] | Area %  | Peak # | RetTime [min] | Type | Width [min] | Area [mAU*s] | Height [mAU] | Area %  |
|--------|---------------|------|-------------|--------------|--------------|---------|--------|---------------|------|-------------|--------------|--------------|---------|
| 1      | 11.539        | BB   | 0.3533      | 6652.34375   | 282.65222    | 50.9721 | 1      | 11.763        | BB   | 0.3915      | 1.89156e4    | 725.86322    | 88.6799 |
| 2      | 23.416        | BB   | 0.7060      | 6398.61133   | 140.55669    | 49.0279 | 2      | 23.507        | BB   | 0.7008      | 2414.60376   | 53.41978     | 11.3201 |

**2-(tert-butyl) 4-ethyl (2S, 3R, 4S)-3-(4-cyanophenyl)-5-oxopyrrolidine-2,4-dicarboxylate (41):**

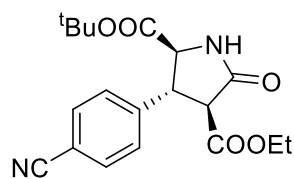

White solid (55.3 mg, 77%);  $R_f = 0.14$  (petroleum ether/ ethyl acetate = 2:1); the enantiomeric excess was determined to be 86% by HPLC analysis on Daicel Chirapak IA-H column (hexane/isopropanol = 70/30, flow rate 1.0 mL/min,  $T = 30\text{ }^\circ\text{C}$ ), UV 220 nm,  $t_R(\text{major})$  10.778 min,  $t_R(\text{minor})$  20.727 min;  $[\alpha]_D^{20} = -22.38$  ( $c=0.29$   $\text{CHCl}_3$ );  $^1\text{H NMR}$  (600 MHz,  $\text{CDCl}_3$ )  $\delta$  7.68 (d,  $J = 8.0$  Hz, 2H), 7.45 (d,  $J = 7.9$  Hz, 2H), 6.75 (s, 1H), 4.28 – 4.16 (m, 3H), 4.14 (t,  $J = 8.1$  Hz, 1H), 3.57 (d,  $J = 8.8$  Hz, 1H), 1.40 (s, 9H), 1.27 (t,  $J = 7.1$  Hz, 3H).  $^{13}\text{C NMR}$  (151 MHz,  $\text{CDCl}_3$ )  $\delta$  169.86, 168.51, 167.65, 144.81, 132.82, 128.44, 118.28, 111.98, 83.51, 62.24, 60.58, 55.63, 47.72, 27.88, 14.06. **HRMS(ESI)**  $m/z$ :  $[\text{M}+\text{H}]^+$  Calculated for  $\text{C}_{19}\text{H}_{23}\text{N}_2\text{O}_5^+$  359.1601; found 359.1597.

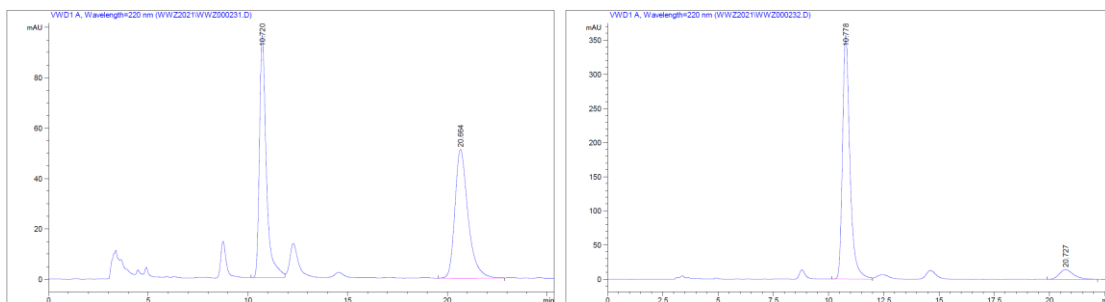

| Peak # | RetTime [min] | Type | Width [min] | Area [mAU*s] | Height [mAU] | Area %  | Peak # | RetTime [min] | Type | Width [min] | Area [mAU*s] | Height [mAU] | Area %  |
|--------|---------------|------|-------------|--------------|--------------|---------|--------|---------------|------|-------------|--------------|--------------|---------|
| 1      | 10.720        | BV   | 0.3578      | 2300.09595   | 96.13934     | 49.7129 | 1      | 10.778        | BV   | 0.3502      | 8302.09570   | 356.81232    | 93.1090 |
| 2      | 20.664        | BB   | 0.6869      | 2326.66455   | 51.12508     | 50.2871 | 2      | 20.727        | BB   | 0.6686      | 614.43677    | 14.10458     | 6.8910  |

**2-(tert-butyl) 4-ethyl (2S, 3R, 4S)-3-(4-chlorophenyl)-5-oxopyrrolidine-2,4-dicarboxylate (4m):**

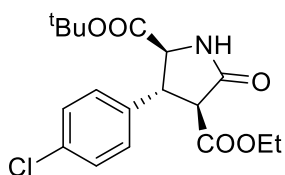

White solid (60.9 mg, 83%);  $R_f = 0.20$  (petroleum ether/ ethyl acetate = 2:1); the enantiomeric excess was determined to be 90% by HPLC analysis on Daicel Chirapak AD-H column (hexane/isopropanol = 70/30, flow rate 1.0 mL/min,  $T = 30\text{ }^\circ\text{C}$ ), UV 220 nm,  $t_R$ (major) 7.821

min,  $t_R$ (minor) 14.362 min;  $[\alpha]_D^{20} = 5.02$  ( $c=0.58$ ,  $\text{CHCl}_3$ );  $^1\text{H NMR}$  (600 MHz,  $\text{CDCl}_3$ )  $\delta$  7.34 (d,  $J = 8.2$  Hz, 2H), 7.25 (d,  $J = 10.2$  Hz, 2H), 6.21 (s, 1H), 4.26 – 4.16 (m, 2H), 4.13 (d,  $J = 7.4$  Hz, 1H), 4.06 (t,  $J = 8.2$  Hz, 1H), 3.53 (d,  $J = 8.9$  Hz, 1H), 1.41 (s, 9H), 1.26 (t,  $J = 7.1$  Hz, 3H).  $^{13}\text{C NMR}$  (151 MHz,  $\text{CDCl}_3$ )  $\delta$  170.26, 168.84, 167.95, 138.05, 133.72, 129.17, 128.84, 83.20, 62.07, 61.02, 55.95, 47.34, 27.90, 14.08. **HRMS(ESI)**  $m/z$ :  $[\text{M}+\text{H}]^+$  Calculated for  $\text{C}_{19}\text{H}_{26}\text{NO}_5^+$  368.1259; found 368.1254.

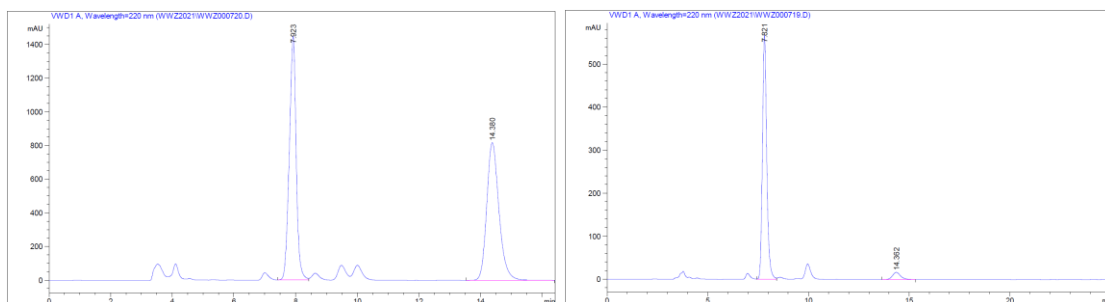

| Peak # | RetTime [min] | Type | Width [min] | Area [mAU*s] | Height [mAU] | Area %  | Peak # | RetTime [min] | Type | Width [min] | Area [mAU*s] | Height [mAU] | Area %  |
|--------|---------------|------|-------------|--------------|--------------|---------|--------|---------------|------|-------------|--------------|--------------|---------|
| 1      | 7.923         | BV   | 0.2307      | 2.22788e4    | 1446.86328   | 49.8115 | 1      | 7.821         | VV   | 0.2250      | 8449.72852   | 566.75372    | 94.9220 |
| 2      | 14.380        | BBA  | 0.4179      | 2.24474e4    | 817.84137    | 50.1885 | 2      | 14.362        | BB   | 0.4164      | 452.03436    | 16.54855     | 5.0780  |

**2-(tert-butyl) 4-ethyl (2S, 3R, 4S)-3-([1,1'-biphenyl]-4-yl)-5-oxopyrrolidine-2,4-dicarboxylate (4n):**

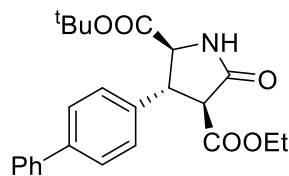

Colorless oil (56.0 mg, 68%);  $R_f = 0.24$  (petroleum ether/ ethyl acetate = 2:1); the enantiomeric excess was determined to be 88% by HPLC analysis on Daicel Chirapak IA-H column (hexane/isopropanol = 90/10, flow rate 1.0 mL/min,  $T = 30\text{ }^\circ\text{C}$ ), UV 220 nm,  $t_R(\text{major})$  22.718 min,  $t_R(\text{minor})$  39.652 min;  $[\alpha]_D^{20} = -10.37$  ( $c=1.22$   $\text{CHCl}_3$ );  $^1\text{H NMR}$  (600 MHz,  $\text{CDCl}_3$ )  $\delta$  7.58 (t,  $J = 6.9$  Hz, 4H), 7.44 (t,  $J = 7.5$  Hz, 2H), 7.39 – 7.34 (m, 3H), 6.89 (s, 1H), 4.26 – 4.19 (m, 3H), 4.13 (t,  $J = 7.8$  Hz, 1H), 3.64 (d,  $J = 8.6$  Hz, 1H), 1.43 (s, 9H), 1.27 (t,  $J = 7.1$  Hz, 3H).  $^{13}\text{C NMR}$  (151 MHz,  $\text{CDCl}_3$ )  $\delta$  170.78, 169.17, 168.23, 140.76, 140.45, 138.75, 128.83, 127.87, 127.66, 127.49, 127.02, 82.99, 61.98, 61.36, 56.04, 47.61, 27.92, 14.11. **HRMS(ESI)**  $m/z$ :  $[\text{M}+\text{H}]^+$  Calculated for  $\text{C}_{24}\text{H}_{28}\text{NO}_5^+$  410.1962; found 410.1948.

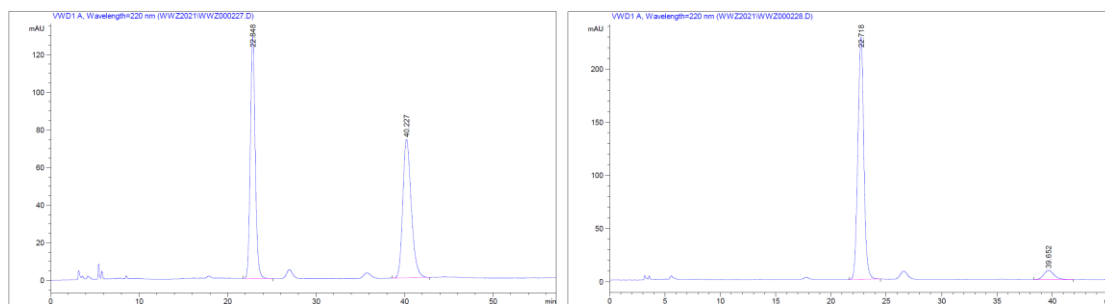

| Peak # | RetTime [min] | Type | Width [min] | Area [mAU*s] | Height [mAU] | Area %  | Peak # | RetTime [min] | Type | Width [min] | Area [mAU*s] | Height [mAU] | Area %  |
|--------|---------------|------|-------------|--------------|--------------|---------|--------|---------------|------|-------------|--------------|--------------|---------|
| 1      | 22.848        | BB   | 0.5878      | 4919.26172   | 128.57045    | 50.0435 | 1      | 22.718        | BB   | 0.5762      | 8504.91797   | 228.18091    | 93.9226 |
| 2      | 40.227        | BB   | 1.0140      | 4910.70361   | 73.65630     | 49.9565 | 2      | 39.652        | BB   | 0.9602      | 550.31860    | 8.55710      | 6.0774  |

**2-(tert-butyl) 4-ethyl (2S, 3R, 4S)-3-(4-methoxyphenyl)-5-oxopyrrolidine-2,4-dicarboxylate(4o):**

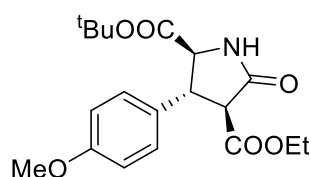

Colorless oil (33.9 mg, 47%);  $R_f = 0.20$  (petroleum ether/ ethyl acetate = 2:1); the enantiomeric excess was determined to be 86 % by HPLC analysis on Daicel Chirapak AD-H column (hexane/isopropanol = 70/30, flow rate 1.0 mL/min,  $T = 30\text{ }^\circ\text{C}$ ), UV 220 nm,  $t_R(\text{major})$  8.419 min,  $t_R(\text{minor})$  14.098 min;  $[\alpha]_D^{20} = -12.24$  ( $c=0.68$ ,  $\text{CHCl}_3$ );  $^1\text{H NMR}$  (600 MHz,  $\text{CDCl}_3$ )  $\delta$  7.21 (d,  $J = 8.3$  Hz, 2H), 6.88 (d,  $J = 8.3$  Hz, 2H), 6.43 (s, 1H), 4.26 – 4.15 (m, 2H), 4.13 (d,  $J = 7.3$  Hz, 1H), 4.03 (t,  $J = 8.1$  Hz, 1H), 3.80 (s, 3H), 3.55 (d,  $J = 8.8$  Hz, 1H), 1.41 (s, 9H), 1.26 (t,  $J = 7.1$  Hz, 3H).  $^{13}\text{C NMR}$  (151 MHz,  $\text{CDCl}_3$ )  $\delta$  170.65, 169.17, 168.25, 159.14, 131.60, 128.50, 114.34, 82.88, 61.91, 61.41, 56.16, 55.31, 47.37, 27.91, 14.10. **HRMS(ESI)**  $m/z$ :  $[\text{M}+\text{H}]^+$  Calculated for  $\text{C}_{19}\text{H}_{26}\text{NO}_6^+$  364.1755; found 364.1751.

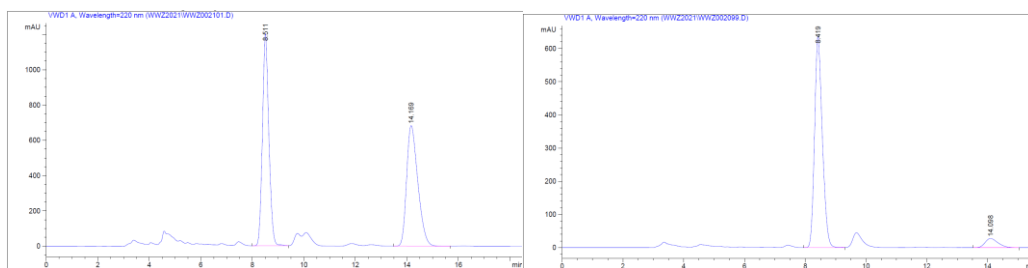

| Peak # | RetTime [min] | Type | Width [min] | Area [mAU*s] | Height [mAU] | Area %  | Peak # | RetTime [min] | Type | Width [min] | Area [mAU*s] | Height [mAU] | Area %  |
|--------|---------------|------|-------------|--------------|--------------|---------|--------|---------------|------|-------------|--------------|--------------|---------|
| 1      | 8.511         | BB   | 0.2553      | 2.07284e4    | 1201.17700   | 50.0949 | 1      | 8.419         | BB   | 0.2635      | 1.12747e4    | 636.48938    | 93.2337 |
| 2      | 14.169        | BB   | 0.4634      | 2.06498e4    | 683.24304    | 49.9051 | 2      | 14.098        | BB   | 0.4460      | 818.24072    | 27.75501     | 6.7663  |

## 2-(tert-butyl) 4-ethyl (2*S*, 3*R*, 4*S*)-3-(3,4-dichlorophenyl)-5-oxopyrrolidine-2,4-dicarboxylate

(4p):

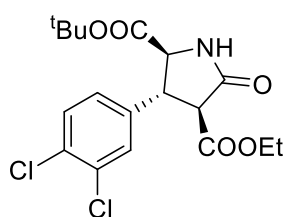

Colorless oil (62.6 mg, 78%);  $R_f = 0.29$  (petroleum ether/ ethyl acetate = 2:1); the enantiomeric excess was determined to be 83% by HPLC analysis on Daicel Chirapak AD-H column (hexane/isopropanol = 85/15, flow rate 1.0 mL/min,  $T = 30\text{ }^\circ\text{C}$ ), UV 220 nm,  $t_R$ (major) 8.892 min,  $t_R$ (minor) 17.757 min;  $[\alpha]_D^{20} = -19.04$  ( $c = 1.25$   $\text{CHCl}_3$ );  $^1\text{H NMR}$  (600 MHz,  $\text{CDCl}_3$ )  $\delta$  7.45 (d,  $J = 8.3$  Hz, 1H), 7.41 (d,  $J = 1.8$  Hz, 1H), 7.27 (s, 1H), 7.15 (d,  $J = 8.2, 1.8$  Hz, 1H), 6.41 (s, 1H), 4.27 – 4.19 (m, 2H), 4.13 (d,  $J = 7.5$  Hz, 1H), 4.05 (t,  $J = 8.3$  Hz, 1H), 3.54 (d,  $J = 9.0$  Hz, 1H), 1.42 (s, 9H), 1.28 (t,  $J = 7.1$  Hz, 3H).  $^{13}\text{C NMR}$  (151 MHz,  $\text{CDCl}_3$ )  $\delta$  169.78, 168.56, 167.73, 139.66, 133.08, 132.07, 130.99, 129.75, 126.78, 83.51, 62.24, 60.72, 55.63, 46.95, 27.92, 14.09. **HRMS(ESI)**  $m/z$ :  $[\text{M}+\text{H}]^+$  Calculated for  $\text{C}_{18}\text{H}_{22}\text{Cl}_2\text{NO}_5^+$  402.0870; found 402.0860.

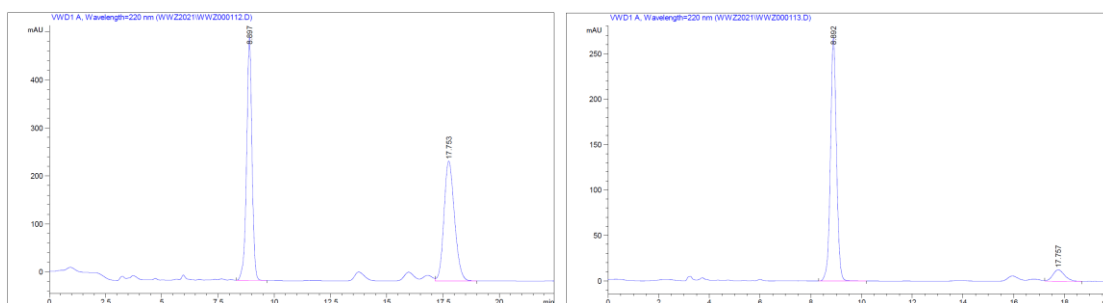

| Peak # | RetTime [min] | Type | Width [min] | Area [mAU*s] | Height [mAU] | Area %  | Peak # | RetTime [min] | Type | Width [min] | Area [mAU*s] | Height [mAU] | Area %  |
|--------|---------------|------|-------------|--------------|--------------|---------|--------|---------------|------|-------------|--------------|--------------|---------|
| 1      | 8.897         | BB   | 0.2497      | 8418.58496   | 505.37717    | 50.9180 | 1      | 8.892         | BB   | 0.2511      | 4416.99902   | 267.27997    | 91.4548 |
| 2      | 17.753        | VB   | 0.5016      | 8115.03760   | 249.67880    | 49.0820 | 2      | 17.757        | VB   | 0.4988      | 412.70572    | 12.69391     | 8.5452  |

## 2-(tert-butyl) 4-ethyl (2*S*, 3*R*, 4*S*)-3-(6-methoxynaphthalen-2-yl)-5-oxopyrrolidine-2,4-dicarboxylate (4q):

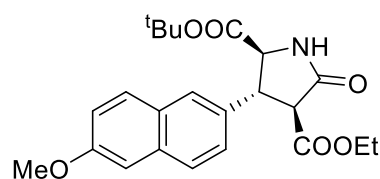

Light yellow oil (42.2 mg, 51%);  $R_f = 0.14$  (petroleum ether/ ethyl acetate = 2:1); the enantiomeric excess was determined to be 87% by HPLC analysis on Daicel Chirapak AD-H column (hexane/isopropanol = 70/30, flow rate 1.0 mL/min,  $T = 30\text{ }^\circ\text{C}$ ), UV 220 nm,  $t_R(\text{major})$  21.644 min,  $t_R(\text{minor})$  33.594 min;  $[\alpha]_D^{20} = -20.93$  ( $c=0.84$   $\text{CHCl}_3$ );  $^1\text{H NMR}$  (600 MHz,  $\text{CDCl}_3$ )  $\delta$  7.75 (d,  $J = 8.4$  Hz, 1H), 7.71 (d,  $J = 8.8$  Hz, 1H), 7.68 (s, 1H), 7.37 (d,  $J = 8.3$  Hz, 1H), 7.16 (d,  $J = 8.9$  Hz, 1H), 7.13 (s, 1H), 6.77 (s, 1H), 4.27 (d,  $J = 7.0$  Hz, 1H), 4.24 – 4.17 (m, 3H), 3.92 (s, 3H), 3.70 (d,  $J = 8.5$  Hz, 1H), 1.39 (s, 9H), 1.25 (t,  $J = 7.1$  Hz, 3H).  $^{13}\text{C NMR}$  (151 MHz,  $\text{CDCl}_3$ )  $\delta$  170.83, 169.25, 168.31, 157.97, 134.65, 134.01, 129.25, 128.84, 127.80, 126.48, 125.38, 119.37, 105.75, 82.91, 61.94, 61.39, 56.04, 55.33, 47.99, 27.91, 27.83, 14.08. **HRMS(ESI)**  $m/z$ :  $[\text{M}+\text{H}]^+$  Calculated for  $\text{C}_{23}\text{H}_{28}\text{NO}_6^+$  414.1911; found 414.1905.

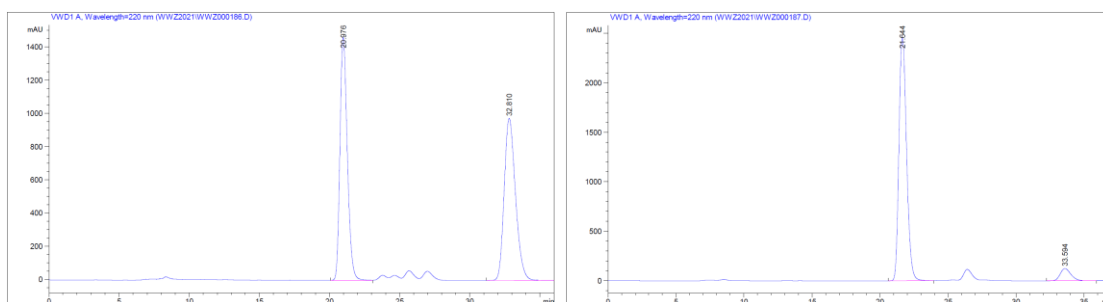

| Peak # | RetTime [min] | Type | Width [min] | Area [mAU*s] | Height [mAU] | Area %  | Peak # | RetTime [min] | Type | Width [min] | Area [mAU*s] | Height [mAU] | Area %  |
|--------|---------------|------|-------------|--------------|--------------|---------|--------|---------------|------|-------------|--------------|--------------|---------|
| 1      | 20.976        | VB   | 0.5600      | 5.32544e4    | 1463.73987   | 49.3502 | 1      | 21.644        | BB   | 0.6041      | 9.55722e4    | 2456.25562   | 93.3874 |
| 2      | 32.810        | BBA  | 0.8643      | 5.46569e4    | 976.58160    | 50.6498 | 2      | 33.594        | BB   | 0.8431      | 6767.33350   | 124.11566    | 6.6126  |

### 2-(tert-butyl) 4-ethyl (2S, 3R, 4S)-5-oxo-3-(pyridin-2-yl)pyrrolidine-2,4-dicarboxylate (5a):

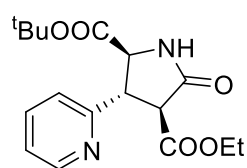

White solid (54.5 mg, 82%);  $R_f = 0.14$  (petroleum ether/ ethyl acetate = 2:1); the enantiomeric excess was determined to be 88% by HPLC analysis on Daicel Chirapak AD-H column (hexane/isopropanol = 70/30, flow rate 1.0 mL/min,  $T = 30\text{ }^\circ\text{C}$ ), UV 220 nm,  $t_R(\text{major})$  12.112 min,  $t_R(\text{minor})$  20.371 min;  $[\alpha]_D^{20} = -14.07$  ( $c=1.10$   $\text{CHCl}_3$ );  $^1\text{H NMR}$  (600 MHz,  $\text{CDCl}_3$ )  $\delta$  8.61 (d,  $J = 3.9$  Hz, 1H), 7.65 (t,  $J = 7.6$  Hz, 1H), 7.28 (d,  $J = 1.8$  Hz, 1H), 7.24 – 7.20 (m, 1H), 6.62 (s, 1H), 4.55 (d,  $J = 7.9$  Hz, 1H), 4.26 – 4.17 (m, 3H), 3.98 (d,  $J = 9.5$  Hz, 1H), 1.40 (s, 9H), 1.26 (t,  $J = 7.1$  Hz, 3H).  $^{13}\text{C NMR}$  (151 MHz,  $\text{CDCl}_3$ ) 170.23, 169.31, 168.39, 157.81, 149.88, 136.62, 124.08, 122.65, 82.82, 61.82, 59.30, 54.56, 49.30, 27.89, 14.09. **HRMS(ESI)**  $m/z$ :  $[\text{M}+\text{H}]^+$  Calculated for  $\text{C}_{17}\text{H}_{23}\text{N}_2\text{O}_5^+$  335.1601; found 335.1598.

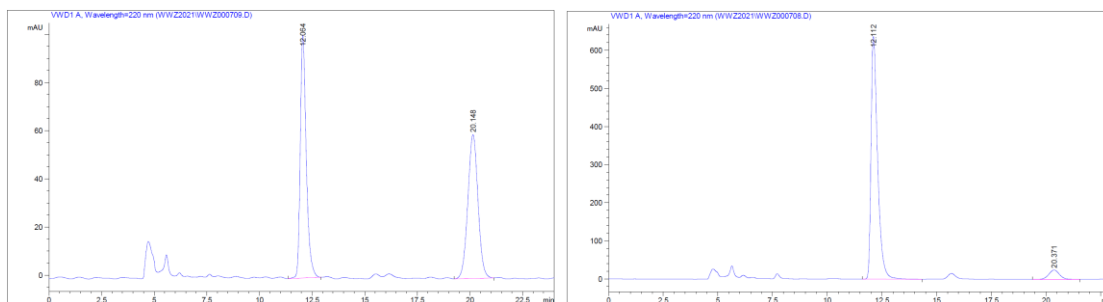

| Peak # | RetTime [min] | Type | Width [min] | Area [mAU*s] | Height [mAU] | Area %  | Peak # | RetTime [min] | Type | Width [min] | Area [mAU*s] | Height [mAU] | Area %  |
|--------|---------------|------|-------------|--------------|--------------|---------|--------|---------------|------|-------------|--------------|--------------|---------|
| 1      | 12.064        | BB   | 0.3000      | 1999.35547   | 100.78664    | 50.0983 | 1      | 12.112        | BB   | 0.3131      | 1.32786e4    | 637.10431    | 94.2442 |
| 2      | 20.148        | BB   | 0.5127      | 1991.50818   | 59.76080     | 49.9017 | 2      | 20.371        | BB   | 0.5138      | 810.96588    | 24.35573     | 5.7558  |

**2-(tert-butyl) 4-ethyl (2S, 3R, 4S)-3-(3-bromopyridin-2-yl)-5-oxopyrrolidine-2,4-dicarboxylate (5b):**

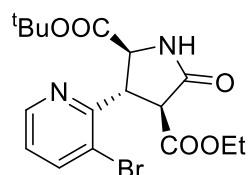

Colorless oil (60.0 mg, 73%);  $R_f = 0.10$  (petroleum ether/ ethyl acetate = 2:1); the enantiomeric excess was determined to be 91% by HPLC analysis on Daicel Chirapak AD-H column (hexane/isopropanol = 70/30, flow rate 1.0 mL/min,  $T = 30\text{ }^\circ\text{C}$ ), UV 220 nm,  $t_R(\text{major})$  15.506 min,  $t_R(\text{minor})$  20.651 min;  $[\alpha]_D^{20} = -3.69$  ( $c=0.71$   $\text{CHCl}_3$ );  $^1\text{H NMR}$  (600 MHz,  $\text{CDCl}_3$ )  $\delta$  8.55 (d,  $J = 3.4$  Hz, 1H), 7.90 – 7.86 (m, 1H), 7.11 (dd,  $J = 8.0, 4.5$  Hz, 1H), 6.36 (s, 1H), 4.84 (t,  $J = 7.9$  Hz, 1H), 4.62 (d,  $J = 7.2$  Hz, 1H), 4.28 – 4.18 (m, 2H), 3.76 (d,  $J = 8.5$  Hz, 1H), 1.41 (s, 9H), 1.28 (t,  $J = 7.1$  Hz, 3H).  $^{13}\text{C NMR}$  (151 MHz,  $\text{CDCl}_3$ )  $\delta$  169.97, 169.15, 168.05, 156.67, 148.38, 140.65, 123.82, 121.72, 82.95, 61.93, 59.50, 55.07, 47.26, 27.78, 14.11. **HRMS(ESI)**  $m/z$ :  $[\text{M}+\text{H}]^+$  Calculated for  $\text{C}_{17}\text{H}_{22}\text{BrN}_2\text{O}_5^+$  413.0707; found 413.0714.

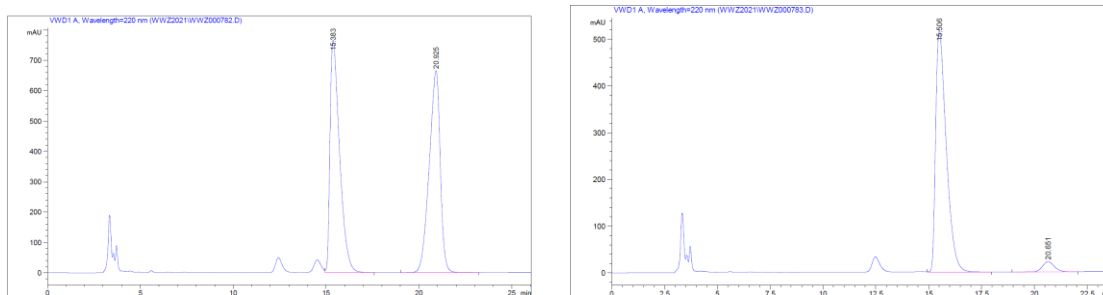

| Peak # | RetTime [min] | Type | Width [min] | Area [mAU*s] | Height [mAU] | Area %  | Peak # | RetTime [min] | Type | Width [min] | Area [mAU*s] | Height [mAU] | Area %  |
|--------|---------------|------|-------------|--------------|--------------|---------|--------|---------------|------|-------------|--------------|--------------|---------|
| 1      | 15.383        | VB   | 0.5421      | 2.73358e4    | 765.32312    | 50.0567 | 1      | 15.506        | VB   | 0.5318      | 1.80250e4    | 517.46094    | 95.4424 |
| 2      | 20.925        | BB   | 0.6206      | 2.72739e4    | 663.98413    | 49.9433 | 2      | 20.651        | BB   | 0.6031      | 860.72614    | 21.82061     | 4.5576  |

**2-(tert-butyl) 4-ethyl (2S, 3R, 4S)-5-oxo-3-(quinolin-2-yl)pyrrolidine-2,4-dicarboxylate (5c):**



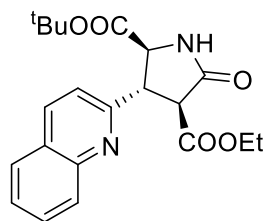

Yellow oil (72.6 mg, 94%);  $R_f = 0.20$  (petroleum ether/ ethyl acetate = 2:1); the enantiomeric excess was determined to be 85% by HPLC analysis on Daicel Chirapak AD-H column (hexane/isopropanol = 80/20, flow rate 1.0 mL/min,  $T = 30\text{ }^\circ\text{C}$ ), UV 220 nm,  $t_R(\text{major})$  10.611 min,  $t_R(\text{minor})$  23.306 min;  $[\alpha]_D^{20} = -50.25$  ( $c=1.45$   $\text{CHCl}_3$ );  $^1\text{H NMR}$  (600 MHz,  $\text{CDCl}_3$ )  $\delta$  8.13 (d,  $J = 8.3$  Hz, 1H), 8.04 (d,  $J = 8.4$  Hz, 1H), 7.81 (d,  $J = 8.1$  Hz, 1H), 7.72 (t,  $J = 7.6$  Hz, 1H), 7.53 (t,  $J = 7.4$  Hz, 1H), 7.43 (d,  $J = 8.3$  Hz, 1H), 6.76 (s, 1H), 4.72 (d,  $J = 7.5$  Hz, 1H), 4.43 (dd,  $J = 8.8, 7.7$  Hz, 1H), 4.28 – 4.16 (m, 3H), 1.42 (s, 9H), 1.27 (t,  $J = 7.1$  Hz, 3H).  $^{13}\text{C NMR}$  (151 MHz,  $\text{CDCl}_3$ )  $\delta$  170.46, 169.47, 168.55, 158.32, 147.96, 136.77, 129.70, 129.27, 127.55, 127.47, 126.54, 121.95, 82.95, 61.88, 59.62, 54.44, 49.43, 27.93, 27.86, 14.11. **HRMS(ESI)**  $m/z$ :  $[\text{M}+\text{H}]^+$  Calculated for  $\text{C}_{21}\text{H}_{25}\text{N}_2\text{O}_5^+$  385.1758; found 385.1757.

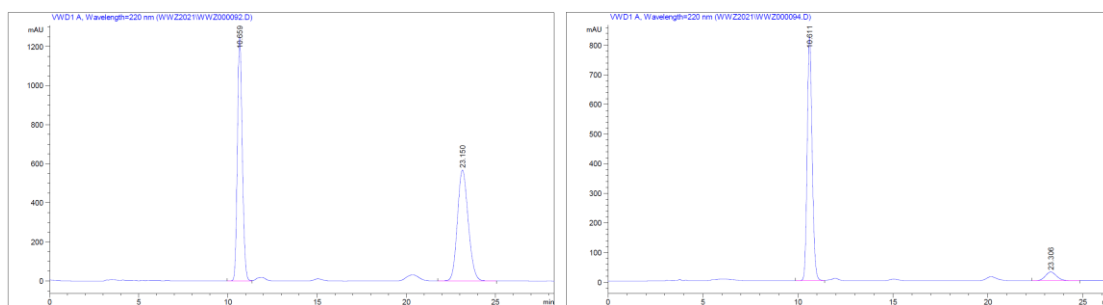

| Peak # | RetTime [min] | Type | Width [min] | Area [mAU*s] | Height [mAU] | Area %  | Peak # | RetTime [min] | Type | Width [min] | Area [mAU*s] | Height [mAU] | Area %  |
|--------|---------------|------|-------------|--------------|--------------|---------|--------|---------------|------|-------------|--------------|--------------|---------|
| 1      | 10.659        | BV   | 0.2963      | 2.38465e4    | 1245.28394   | 49.9094 | 1      | 10.611        | BV   | 0.2793      | 1.49500e4    | 821.70868    | 92.6725 |
| 2      | 23.150        | BB   | 0.6535      | 2.39331e4    | 567.92902    | 50.0906 | 2      | 23.306        | BB   | 0.6260      | 1182.07019   | 29.15993     | 7.3275  |

### 2-(tert-butyl) 4-ethyl (2S, 3R, 4S)-5-oxo-3-(thiophen-3-yl)pyrrolidine-2,4-dicarboxylate (5d):

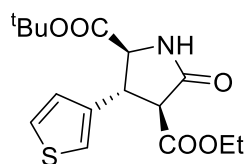

Colorless oil (51.3 mg, 76%);  $R_f = 0.23$  (petroleum ether/ ethyl acetate = 2:1); the enantiomeric excess was determined to be 87% by HPLC analysis on Daicel Chirapak AD-H column (hexane/isopropanol = 90/10, flow rate 1.0 mL/min,  $T = 30\text{ }^\circ\text{C}$ ), UV 220 nm,  $t_R(\text{major})$  26.987 min,  $t_R(\text{minor})$  45.892 min;  $[\alpha]_D^{20} = -5.79$  ( $c=1.08$   $\text{CHCl}_3$ );  $^1\text{H NMR}$  (600 MHz,  $\text{CDCl}_3$ )  $\delta$  7.34 (dd,  $J = 4.6, 2.9$  Hz, 1H), 7.18 (s, 1H), 7.05 (d,  $J = 4.2$  Hz, 1H), 6.90 (s, 1H), 4.23 (m,  $J = 20.2, 12.2, 5.7$  Hz, 3H), 4.16 (d,  $J = 7.1$  Hz, 1H), 3.57 (d,  $J = 8.6$  Hz, 1H), 1.44 (s, 9H), 1.28 (t,  $J = 7.1$  Hz, 3H).  $^{13}\text{C NMR}$  (151 MHz,  $\text{CDCl}_3$ )  $\delta$  170.79, 170.71, 169.11, 169.09, 168.22, 140.09, 126.87, 126.13, 126.11, 121.96, 83.01, 82.98, 62.01, 60.98, 60.93, 55.59, 55.57, 43.16, 43.11, 27.91, 14.12. **HRMS(ESI)**  $m/z$ :  $[\text{M}+\text{H}]^+$  Calculated for  $\text{C}_{16}\text{H}_{22}\text{NO}_5\text{S}^+$  340.1213; found 340.1204.

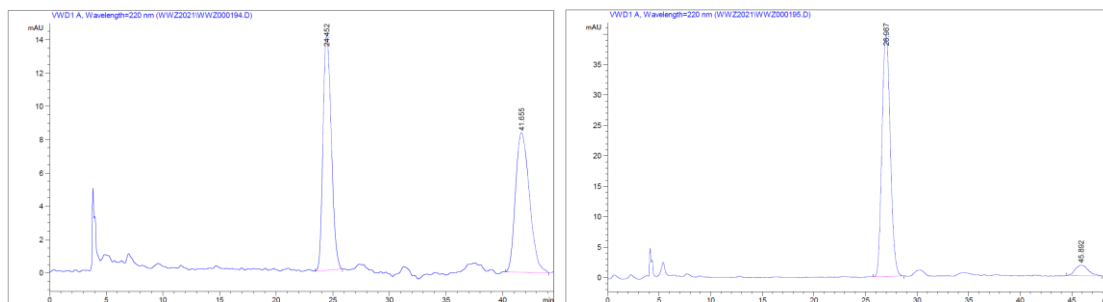

| Peak # | RetTime [min] | Type | Width [min] | Area [mAU*s] | Height [mAU] | Area %  | Peak # | RetTime [min] | Type | Width [min] | Area [mAU*s] | Height [mAU] | Area %  |
|--------|---------------|------|-------------|--------------|--------------|---------|--------|---------------|------|-------------|--------------|--------------|---------|
| 1      | 24.452        | BB   | 0.8188      | 722.25665    | 14.07394     | 50.2157 | 1      | 26.987        | BB   | 0.8919      | 2234.97363   | 39.67696     | 93.6946 |
| 2      | 41.655        | BB   | 1.1878      | 716.05225    | 8.38051      | 49.7843 | 2      | 45.892        | BB   | 1.0289      | 150.40829    | 1.72506      | 6.3054  |

### 2-(tert-butyl) 4-ethyl (2*S*, 3*R*, 4*S*)-3-(furan-2-yl)-5-oxopyrrolidine-2,4-dicarboxylate (**5e**):

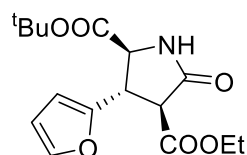

Light yellow oil (54.1 mg, 76%);  $R_f = 0.28$  (petroleum ether/ ethyl acetate = 2:1); the enantiomeric excess was determined to be 87% by HPLC analysis on Daicel Chirapak AD-H column (hexane/isopropanol = 90/10, flow rate 1.0 mL/min,  $T = 30\text{ }^\circ\text{C}$ ), UV 220 nm,  $t_R(\text{major})$  19.886 min,  $t_R(\text{minor})$  36.529 min;  $[\alpha]_D^{20} = -5.52$  ( $c=1.03$   $\text{CHCl}_3$ );  $^1\text{H NMR}$  (600 MHz,  $\text{CDCl}_3$ )  $\delta$  7.38 (s, 1H), 6.79 (s, 1H), 6.33 (d,  $J = 1.1$  Hz, 1H), 6.24 (d,  $J = 2.8$  Hz, 1H), 4.28 – 4.22 (m, 3H), 4.19 (t,  $J = 8.2$  Hz, 1H), 3.69 (d,  $J = 8.9$  Hz, 1H), 1.45 (s, 9H), 1.29 (t,  $J = 7.1$  Hz, 3H).  $^{13}\text{C NMR}$  (151 MHz,  $\text{CDCl}_3$ )  $\delta$  170.19, 168.80, 167.93, 151.36, 142.41, 142.09, 110.46, 107.45, 83.07, 62.03, 58.56, 58.54, 53.35, 53.18, 41.35, 30.87, 27.89, 27.82, 14.09, 13.86. **HRMS(ESI)**  $m/z$ :  $[\text{M}+\text{H}]^+$  Calculated for  $\text{C}_{16}\text{H}_{22}\text{NO}_6$   $^+$  324.1442; found 324.1446.

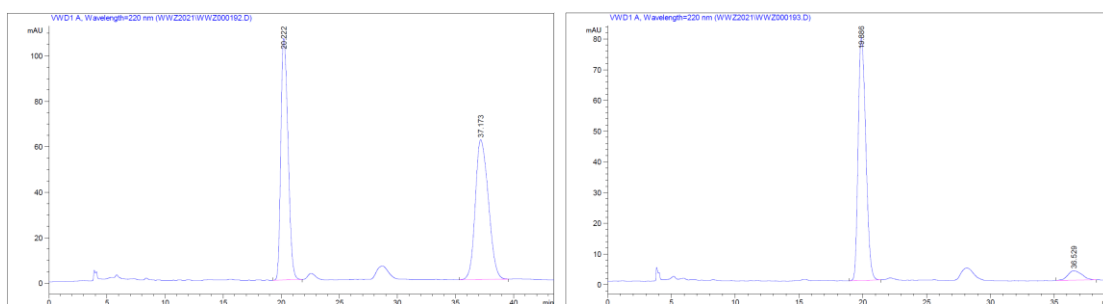

| Peak # | RetTime [min] | Type | Width [min] | Area [mAU*s] | Height [mAU] | Area %  | Peak # | RetTime [min] | Type | Width [min] | Area [mAU*s] | Height [mAU] | Area %  |
|--------|---------------|------|-------------|--------------|--------------|---------|--------|---------------|------|-------------|--------------|--------------|---------|
| 1      | 20.222        | BB   | 0.6893      | 4563.93945   | 106.22811    | 48.7192 | 1      | 19.886        | BB   | 0.6730      | 3310.89478   | 78.94369     | 93.3375 |
| 2      | 37.173        | BB   | 1.2359      | 4803.89941   | 61.43177     | 51.2808 | 2      | 36.529        | BB   | 0.9594      | 236.33536    | 3.10014      | 6.6625  |

### 2-(tert-butyl) 4-ethyl (2*S*, 3*R*, 4*S*)-3-(9-ethyl-9H-carbazol-3-yl)-5-oxopyrrolidine-2,4-dicarboxylate (**5f**):

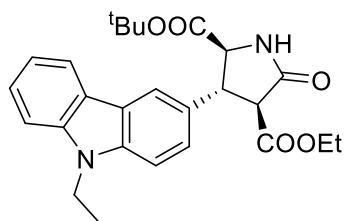

Colorless oil (24.0 mg, 27%);  $R_f = 0.16$  (petroleum ether/ ethyl acetate = 2:1); the enantiomeric excess was determined to be 89% by HPLC analysis on Daicel Chirapak AD-H column (hexane/isopropanol = 70/30, flow rate 1.0 mL/min,  $T = 30\text{ }^\circ\text{C}$ ), UV 220 nm,  $t_R(\text{major})$  22.589 min,  $t_R(\text{minor})$  44.668 min;  $[\alpha]_D^{20} = -34.25$  ( $c=0.25$   $\text{CHCl}_3$ );  $^1\text{H NMR}$  (600 MHz,  $\text{CDCl}_3$ )  $\delta$  8.08 (d,  $J = 7.7$  Hz, 1H), 8.01 (s, 1H), 7.48 (t,  $J = 7.5$  Hz, 1H), 7.43 – 7.37 (m, 3H), 7.23 (d,  $J = 7.4$  Hz, 1H), 6.43 (s, 1H), 4.37 (q,  $J = 7.1$  Hz, 2H), 4.28 (q,  $J = 6.9$  Hz, 2H), 4.21 (m,  $J = 10.7, 7.2, 3.6$  Hz, 2H), 3.74 (d,  $J = 7.6$  Hz, 1H), 1.47 – 1.38 (m, 12H), 1.25 (t,  $J = 7.1$  Hz, 3H).  $^{13}\text{C NMR}$  (151 MHz,  $\text{CDCl}_3$ )  $\delta$  170.84, 169.37, 168.46, 140.40, 139.46, 130.10, 126.01, 124.85, 123.29, 122.59, 120.41, 119.33, 119.05, 108.89, 108.62, 82.85, 62.04, 61.89, 56.67, 48.29, 37.64, 27.94, 27.86, 14.10, 13.78. **HRMS(ESI)**  $m/z$ :  $[\text{M}+\text{H}]^+$  Calculated for  $\text{C}_{26}\text{H}_{31}\text{N}_2\text{O}_5^+$  451.2227; found 451.2207.

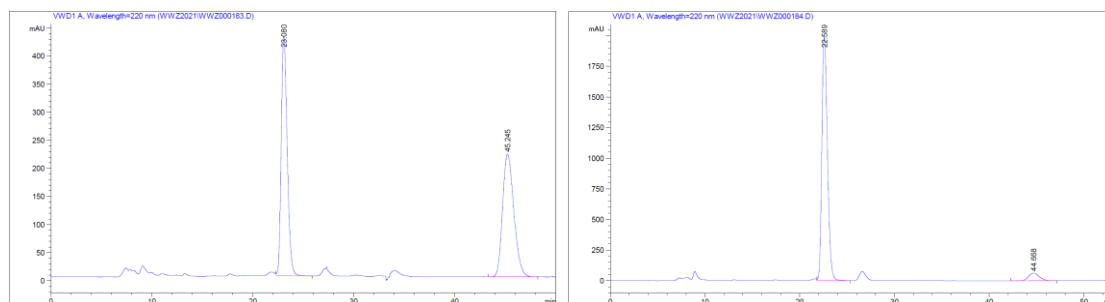

| Peak # | RetTime [min] | Type | Width [min] | Area [mAU*s] | Height [mAU] | Area %  | Peak # | RetTime [min] | Type | Width [min] | Area [mAU*s] | Height [mAU] | Area %  |
|--------|---------------|------|-------------|--------------|--------------|---------|--------|---------------|------|-------------|--------------|--------------|---------|
| 1      | 23.080        | VB   | 0.6350      | 1.76023e4    | 426.11682    | 50.9224 | 1      | 22.589        | VB   | 0.6377      | 8.19314e4    | 1990.39722   | 94.4455 |
| 2      | 45.245        | BB   | 1.1897      | 1.69647e4    | 218.24107    | 49.0776 | 2      | 44.668        | BB   | 1.1851      | 4818.55371   | 61.60942     | 5.5545  |

### 2-(tert-butyl) 4-ethyl (2S, 3R, 4S)-3-methyl-5-oxopyrrolidine-2,4-dicarboxylate(6a):

Colorless solid (30.3 mg, 56%);  $R_f = 0.20$  (petroleum ether/ ethyl acetate = 2:1); the enantiomeric excess was determined to be 84% by HPLC analysis on Daicel Chirapak OD-H column (hexane/isopropanol = 90/10, flow rate 1.0 mL/min,  $T = 30\text{ }^\circ\text{C}$ ), UV 220 nm,  $t_R(\text{major})$  23.972 min,  $t_R(\text{minor})$  16.472 min;  $[\alpha]_D^{20} = 0.72$  ( $c=0.61$ ,  $\text{CHCl}_3$ );  $^1\text{H NMR}$  (600 MHz,  $\text{CDCl}_3$ )  $\delta$  6.20 (s, 1H), 4.25 (q,  $J = 6.7$  Hz, 2H), 3.71 (d,  $J = 7.6$  Hz, 1H), 3.09 (d,  $J = 9.3$  Hz, 1H), 3.00 – 2.83 (m, 1H), 1.50 (s, 9H), 1.34 (d,  $J = 6.7$  Hz, 3H), 1.31 (t,  $J = 7.1$  Hz, 3H).  $^{13}\text{C NMR}$  (151 MHz,  $\text{CDCl}_3$ )  $\delta$  170.97, 169.48, 168.60, 82.92, 61.80, 60.97, 55.80, 38.34, 28.02, 18.58, 14.18. **HRMS(ESI)**  $m/z$ :  $[\text{M}+\text{H}]^+$  Calculated for  $\text{C}_{13}\text{H}_{22}\text{NO}_5^+$  272.1492; found 272.1495.

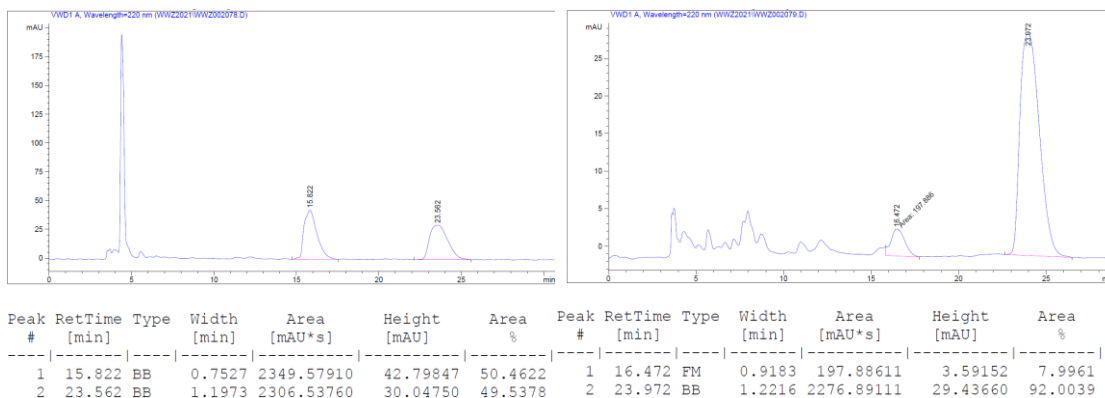

### 2-(tert-butyl) 4-ethyl (2*S*, 3*R*, 4*S*)-3-ethyl-5-oxopyrrolidine-2,4-dicarboxylate (**6b**):

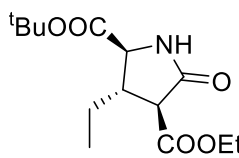
 Colorless oil (13.4 mg, 24%);  $R_f = 0.23$  (petroleum ether/ ethyl acetate = 2:1); the enantiomeric excess was determined to be 79% by HPLC analysis on Daicel Chirapak AD-H column (hexane/isopropanol = 90/10, flow rate 1.0 mL/min,  $T = 30\text{ }^\circ\text{C}$ ), UV 200 nm,  $t_R(\text{major})$  11.906 min,  $t_R(\text{minor})$  17.996 min;  $[\alpha]_D^{20} = 8.46$  ( $c=0.53$   $\text{CHCl}_3$ );  $^1\text{H NMR}$  (600 MHz,  $\text{CDCl}_3$ )  $\delta$  6.20 (s, 1H), 4.26 – 4.20 (m, 2H), 3.75 (d,  $J = 6.3$  Hz, 1H), 3.13 (d,  $J = 7.7$  Hz, 1H), 2.89 – 2.83 (m, 1H), 1.86 (dt,  $J = 13.5, 6.7$  Hz, 1H), 1.61 – 1.54 (m, 1H), 1.50 (s, 9H), 1.30 (t,  $J = 7.1$  Hz, 3H), 0.97 (t,  $J = 7.4$  Hz, 3H).  $^{13}\text{C NMR}$  (151 MHz,  $\text{CDCl}_3$ )  $\delta$  171.39, 169.81, 169.14, 82.76, 61.75, 59.59, 53.86, 44.18, 27.97, 27.15, 14.09, 11.18. **HRMS(ESI)**  $m/z$ :  $[\text{M}+\text{H}]^+$  Calculated for  $\text{C}_{14}\text{H}_{24}\text{NO}_5$   $^+$  286.1649; found 286.1639.

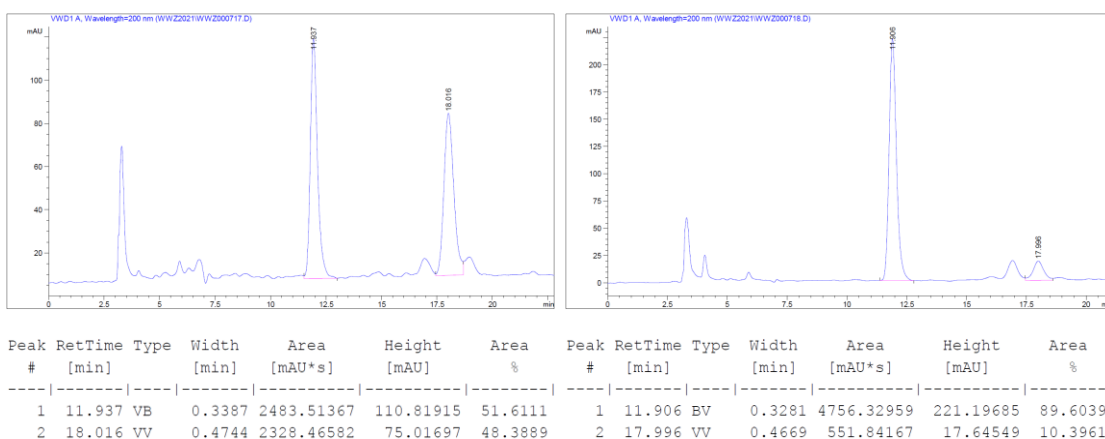

### 2-(tert-butyl) 4-ethyl (2*S*, 3*R*, 4*S*)-3-isobutyl-5-oxopyrrolidine-2,4-dicarboxylate (**6c**):

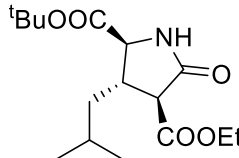
 Colorless oil (19.0 mg, 30%);  $R_f = 0.14$  (petroleum ether/ ethyl acetate = 2:1); the enantiomeric excess was determined to be 72% by HPLC

analysis on Daicel Chirapak AD-H column (hexane/isopropanol = 90/10, flow rate 1.0 mL/min, T = 30 °C), UV 200 nm,  $t_R$ (major) 9.455 min,  $t_R$ (minor) 18.232 min;  $[a]_D^{20} = 0.09$  (c=0.38 CHCl<sub>3</sub>); **<sup>1</sup>H NMR (600 MHz, CDCl<sub>3</sub>)** δ 6.06 (s, 1H), 4.28 – 4.20 (m, 2H), 3.71 (d, J = 6.0 Hz, 1H), 3.09 (d, J = 7.3 Hz, 1H), 3.01 (dt, J = 13.4, 6.7 Hz, 1H), 1.69 – 1.63 (m, 1H), 1.50 (s, 9H), 1.45 (m, J = 15.6, 6.8 Hz, 1H), 1.29 (t, J = 7.1 Hz, 3H), 0.95 (d, J = 6.4 Hz, 3H), 0.91 (d, J = 6.3 Hz, 3H). **<sup>13</sup>C NMR (151 MHz, CDCl<sub>3</sub>)** δ 171.44, 169.84, 169.14, 82.80, 61.79, 60.17, 54.87, 44.56, 40.70, 28.00, 25.75, 23.26, 21.67, 14.08. **HRMS(ESI)** m/z: [M+H]<sup>+</sup> Calculated for C<sub>16</sub>H<sub>28</sub>NO<sub>5</sub><sup>+</sup> 314.1962; found 314.1959.

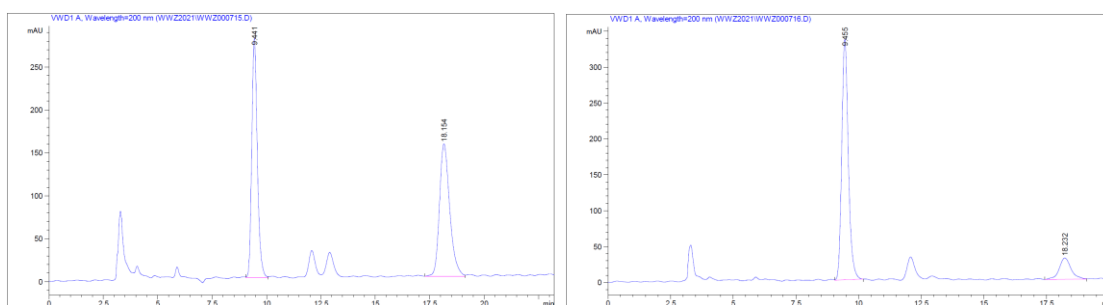

| Peak # | RetTime [min] | Type | Width [min] | Area [mAU*s] | Height [mAU] | Area %  | Peak # | RetTime [min] | Type | Width [min] | Area [mAU*s] | Height [mAU] | Area %  |
|--------|---------------|------|-------------|--------------|--------------|---------|--------|---------------|------|-------------|--------------|--------------|---------|
| 1      | 9.441         | VV   | 0.2697      | 4941.97949   | 278.48883    | 49.5325 | 1      | 9.455         | VB   | 0.2783      | 6103.99707   | 334.87952    | 86.1534 |
| 2      | 18.154        | BV   | 0.4989      | 5035.26221   | 154.26395    | 50.4675 | 2      | 18.232        | BV   | 0.4962      | 981.03381    | 29.80579     | 13.8466 |

**2-(tert-butyl) 4-ethyl (2S, 3R, 4S)-5-oxo-3-(phenylethynyl)pyrrolidine-2,4-dicarboxylate (6d):**

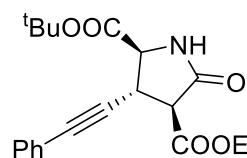

Colorless oil (49.2 mg, 69%);  $R_f = 0.33$  (petroleum ether/ ethyl acetate = 2:1); the enantiomeric excess was determined to be 68% by HPLC analysis on Daicel Chirapak IF-H column (hexane/isopropanol = 90/10, flow rate 1.0 mL/min, T = 30 °C), UV 220 nm,  $t_R$ (major) 20.281 min,  $t_R$ (minor) 23.757 min;  $[a]_D^{20} = 23.67$  (c=1.15 CHCl<sub>3</sub>); **<sup>1</sup>H NMR (600 MHz, CDCl<sub>3</sub>)** δ 7.41 (m, J = 7.5, 1.8 Hz, 2H), 7.31 (m, J = 7.1 Hz, 3H), 6.67 (s, 1H), 4.31 – 4.27 (m, 2H), 4.20 (d, J = 7.1 Hz, 1H), 3.99 – 3.95 (m, 1H), 3.61 (d, J = 8.5 Hz, 1H), 1.53 (s, 9H), 1.33 (t, J = 7.1 Hz, 3H). **<sup>13</sup>C NMR (151 MHz, CDCl<sub>3</sub>)** δ 169.83, 168.34, 167.53, 131.73, 128.53, 128.32, 122.42, 86.39, 83.62, 83.41, 62.26, 60.02, 54.77, 34.34, 27.98, 14.23, 14.14. **HRMS(ESI)** m/z: [M+H]<sup>+</sup> Calculated for C<sub>20</sub>H<sub>24</sub>NO<sub>5</sub><sup>+</sup> 358.1649; found 358.1659.

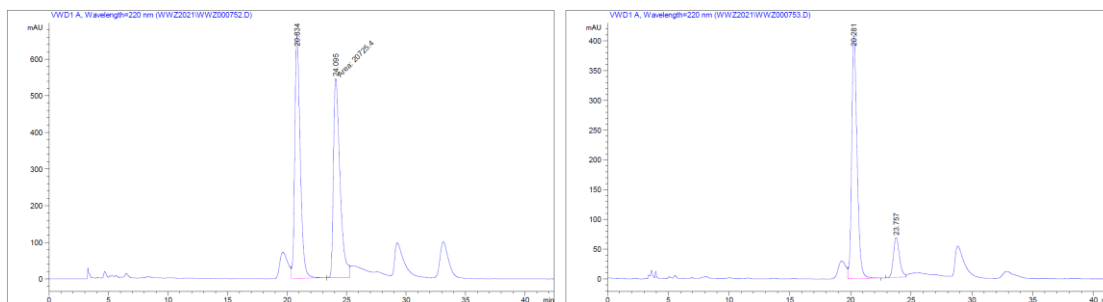

| Peak # | RetTime [min] | Type | Width [min] | Area [mAU*s] | Height [mAU] | Area %  | Peak # | RetTime [min] | Type | Width [min] | Area [mAU*s] | Height [mAU] | Area %  |
|--------|---------------|------|-------------|--------------|--------------|---------|--------|---------------|------|-------------|--------------|--------------|---------|
| 1      | 20.834        | VB   | 0.4816      | 2.09979e4    | 663.24591    | 50.3265 | 1      | 20.281        | VB   | 0.4692      | 1.24989e4    | 408.55649    | 84.2557 |
| 2      | 24.095        | MF   | 0.6347      | 2.07254e4    | 544.23157    | 49.6735 | 2      | 23.757        | BV   | 0.5348      | 2335.60156   | 67.03062     | 15.7443 |

**2-(tert-butyl) 4-ethyl (2S, 3R, 4S)-5-oxo-3-((trimethylsilyl)ethynyl)pyrrolidine-2,4-dicarboxylate (6e):**

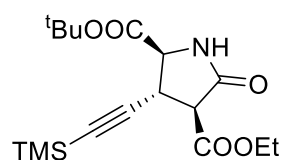

Colorless oil (51.5 mg, 73%);  $R_f = 0.38$  (petroleum ether/ ethyl acetate = 2:1); the enantiomeric excess was determined to be 77% by HPLC analysis on Daicel Chirapak IF-H column (hexane/isopropanol = 90/10, flow rate 1.0 mL/min,  $T = 30\text{ }^\circ\text{C}$ ), UV 220 nm,  $t_R(\text{major})$  11.052 min,  $t_R(\text{minor})$  13.302 min;  $[\alpha]_D^{20} = -9.23$  ( $c=1.12$   $\text{CHCl}_3$ );  $^1\text{H NMR}$  (600 MHz,  $\text{CDCl}_3$ )  $\delta$  6.52 (s, 1H), 4.31 – 4.23 (m, 2H), 4.09 (d,  $J = 6.8$  Hz, 1H), 3.75 (dd,  $J = 7.9, 7.0$  Hz, 1H), 3.49 (d,  $J = 8.1$  Hz, 1H), 1.51 (s, 9H), 1.32 (t,  $J = 7.1$  Hz, 3H), 0.16 (s, 9H).  $^{13}\text{C NMR}$  (151 MHz,  $\text{CDCl}_3$ )  $\delta$  170.14, 168.74, 167.82, 103.29, 88.77, 83.70, 62.52, 60.35, 55.07, 34.84, 28.32, 14.48, 0.37, 0.19.  $[\text{M}+\text{H}]^+$  Calculated for  $\text{C}_{17}\text{H}_{30}\text{NO}_4\text{Si}^+$  354.1731; found 354.1736.

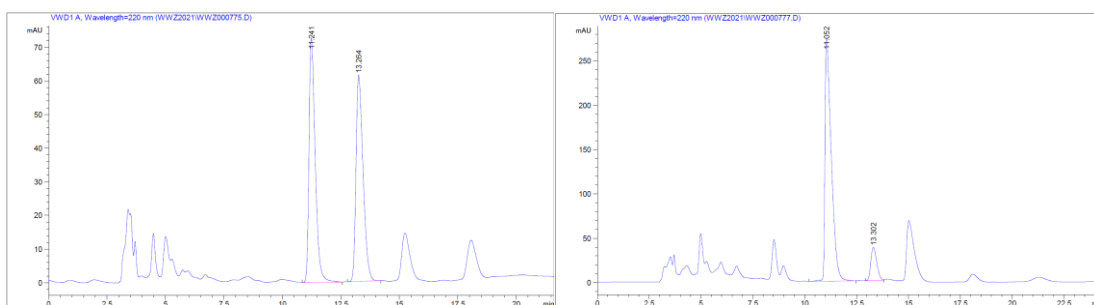

| Peak # | RetTime [min] | Type | Width [min] | Area [mAU*s] | Height [mAU] | Area %  | Peak # | RetTime [min] | Type | Width [min] | Area [mAU*s] | Height [mAU] | Area %  |
|--------|---------------|------|-------------|--------------|--------------|---------|--------|---------------|------|-------------|--------------|--------------|---------|
| 1      | 11.241        | BB   | 0.2786      | 1335.20886   | 72.62550     | 50.7987 | 1      | 11.052        | BB   | 0.3131      | 5813.37891   | 274.04181    | 88.3635 |
| 2      | 13.264        | BB   | 0.3231      | 1293.22058   | 61.37637     | 49.2013 | 2      | 13.302        | VV   | 0.3123      | 765.55530    | 37.99312     | 11.6365 |

#### 4. Determination of the absolute configuration

The absolute configuration of compound **4-6** was established by comparing its optical rotation value with the known compound 4-ethyl 2-methyl (2*S*,3*R*,4*S*)-5-oxo-3-phenylpyrrolidine-2,4-dicarboxylate (**7a**) in literature data:

| (2 <i>S</i> ,3 <i>R</i> ,4 <i>S</i> ) - product ( <b>7a</b> ) in this work                                                                                                                                                                                                                                                                                                                               | (2 <i>S</i> ,3 <i>R</i> ,4 <i>S</i> ) - product in literature <sup>[4]</sup>                                                                                                                                                                                                                                                                                                                     |
|----------------------------------------------------------------------------------------------------------------------------------------------------------------------------------------------------------------------------------------------------------------------------------------------------------------------------------------------------------------------------------------------------------|--------------------------------------------------------------------------------------------------------------------------------------------------------------------------------------------------------------------------------------------------------------------------------------------------------------------------------------------------------------------------------------------------|
| 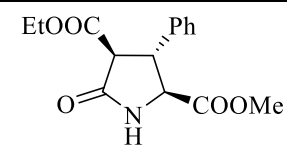 <p>4-ethyl 2-methyl (2<i>S</i>,3<i>R</i>,4<i>S</i>)-5-oxo-3-phenylpyrrolidine-2,4-dicarboxylate</p>                                                                                                                                                                                                                    |  <p>4-ethyl 2-methyl (2<i>S</i>,3<i>R</i>,4<i>S</i>)-5-oxo-3-phenylpyrrolidine-2,4-dicarboxylate</p>                                                                                                                                                                                                           |
| $[\alpha]_D^{20} = -11.03$ (c = 0.40, CHCl <sub>3</sub> ).                                                                                                                                                                                                                                                                                                                                               | $[\alpha]_D^{20} = -16.3$ (c = 0.6, CHCl <sub>3</sub> ).                                                                                                                                                                                                                                                                                                                                         |
| <p><b><sup>1</sup>H NMR (600 MHz, CDCl<sub>3</sub>)</b> δ 7.39 – 7.28 (m, 5H), 6.46 (bs, 1H), 4.29 (d, J = 6.3 Hz, 1H), 4.26 – 4.19 (m, 2H), 4.18 – 4.13 (m, 1H), 3.77 (s, 3H), 3.57 (d, J = 7.7 Hz, 1H), 1.27 (t, J = 7.1 Hz, 3H).</p> <p><b><sup>13</sup>C NMR (151 MHz, CDCl<sub>3</sub>)</b> δ 170.74, 170.68, 168.13, 139.76, 129.19, 127.98, 127.15, 62.10, 60.88, 55.75, 52.78, 47.42, 14.07.</p> | <p><b><sup>1</sup>H NMR (300 MHz, CDCl<sub>3</sub>)</b> δ 7.43-7.27 (m, 5H), 6.48 (bs, 1H), 4.29 (d, J = 6.3 Hz, 1H), 4.26-4.18 (m, 2H), 4.17 (dd, J = 6.3, 7.5 Hz, 1H), 3.77 (s, 3H), 3.57 (d, J = 7.6 Hz, 1H), 1.26 (t, J = 7.1 Hz, 3H).</p> <p><b><sup>13</sup>C NMR (75MHz, CDCl<sub>3</sub>)</b> δ 170.7, 170.7, 168.1, 139.7, 129.2, 127.9, 127.1, 62.1, 60.9, 55.3, 52.8, 47.4, 14.1.</p> |

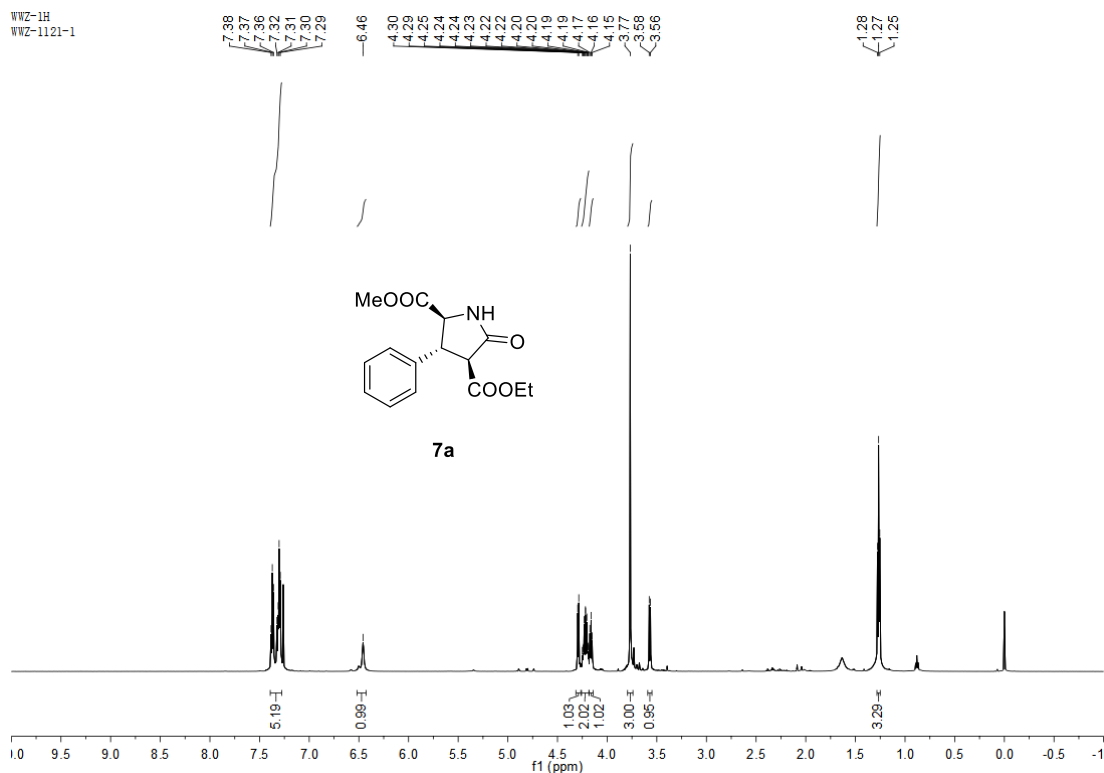

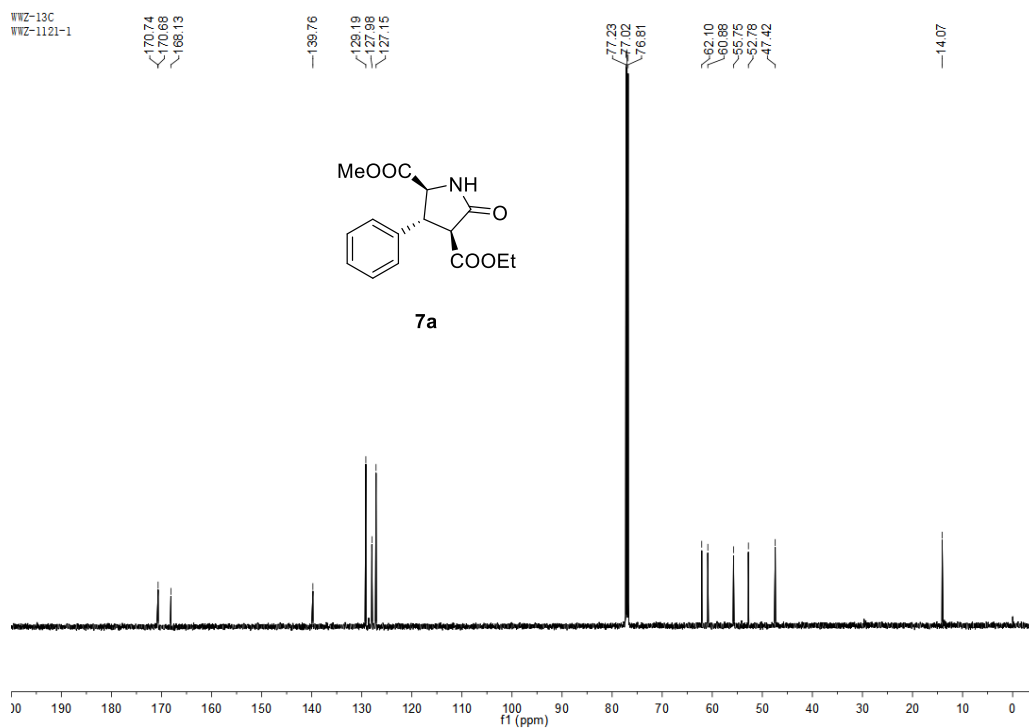

## 5. References

- [1]. I. A. Andreev, N. K. Ratmanova, A. U. Augustin, O. A. Ivanova, I. I. Levina, V. N. Khrustalev, D. B. Werz, I. V. Trushkov, *Angew.Chem. Int. Ed.* 2021, **60**,7927–7934.
- [2]. B.-C. Hong, N. Dange, P.-J. Yen, G.-H. Lee and J.-H. Liao, *Org. Lett.* 2012, **14**, 5346.
- [3]. L. Chen, M.-J. Luo, F. Zhu, W. Wen and Q.-X. Guo, *J. Am. Chem. Soc.* 2018, **140**, 9774.
- [4]. J. Hernández-Toribio, R. G. Arrayás and J. C. Carretero, *Chem. – Eur. J.*, 2011, **17**, 6334-6337.



## 6. The spectrums of $^1\text{H}$ NMR and $^{13}\text{C}$ NMR

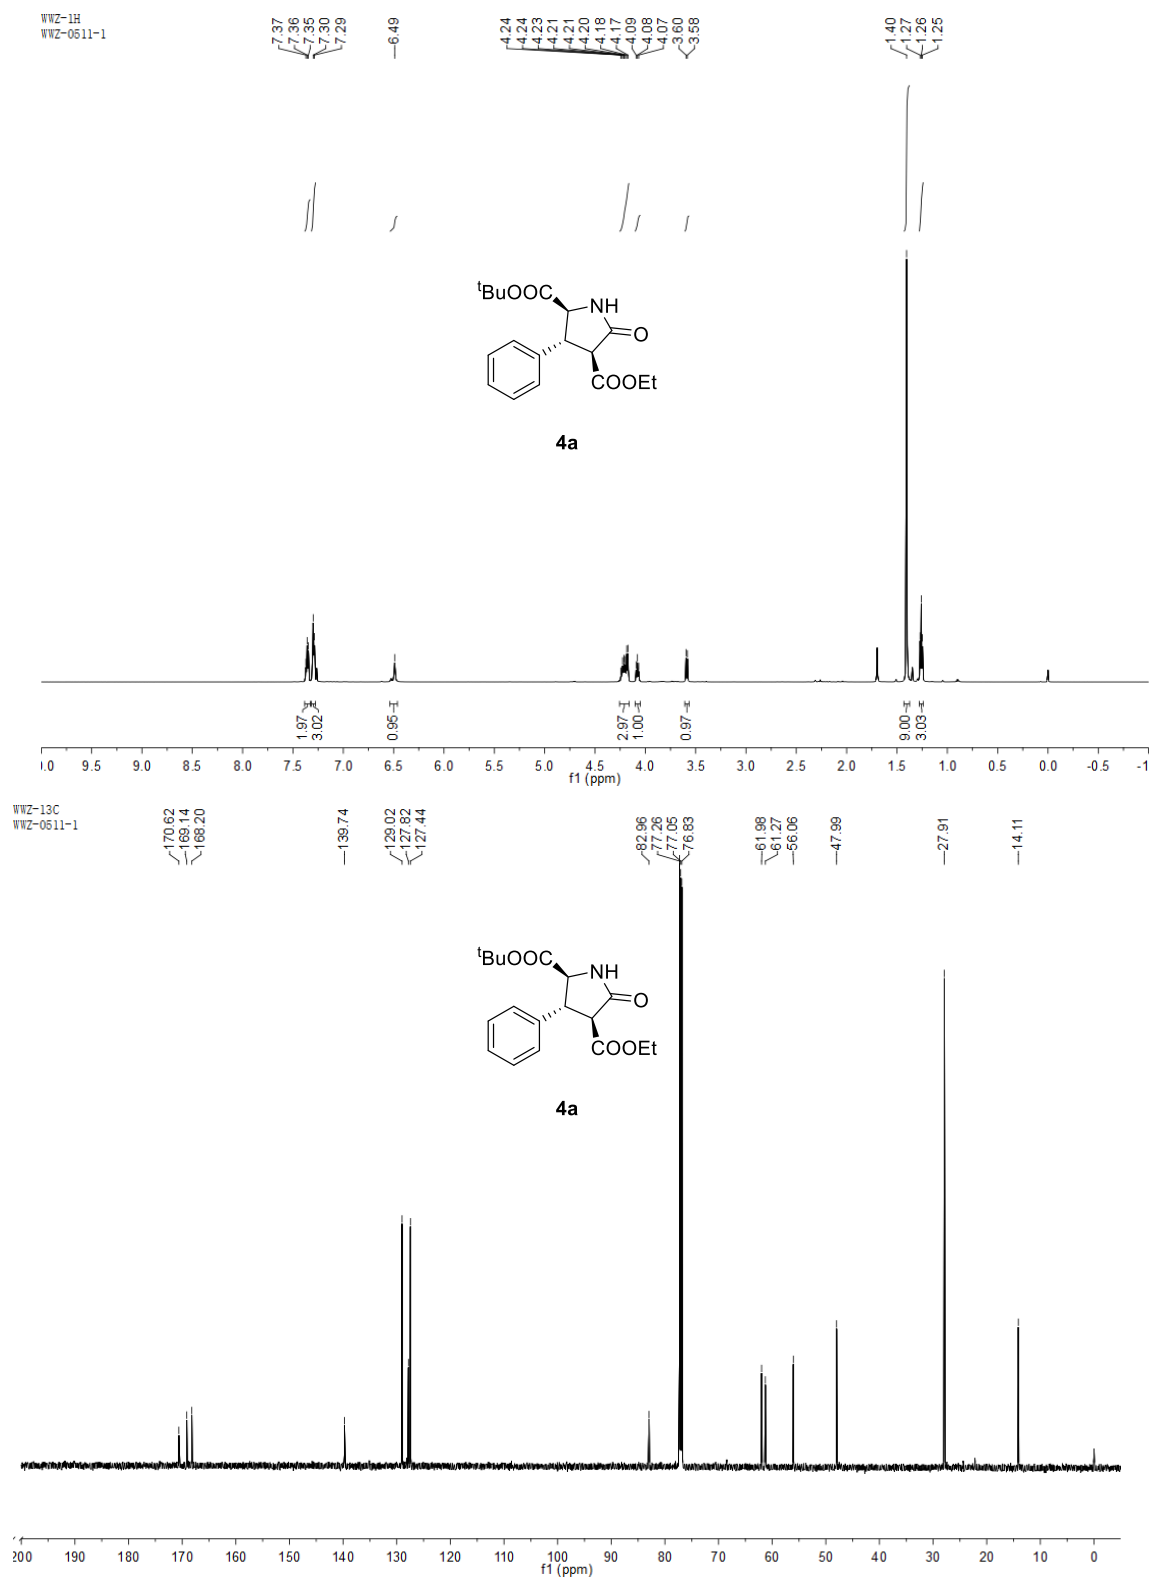

WWZ-1H  
WWZ-0603-1

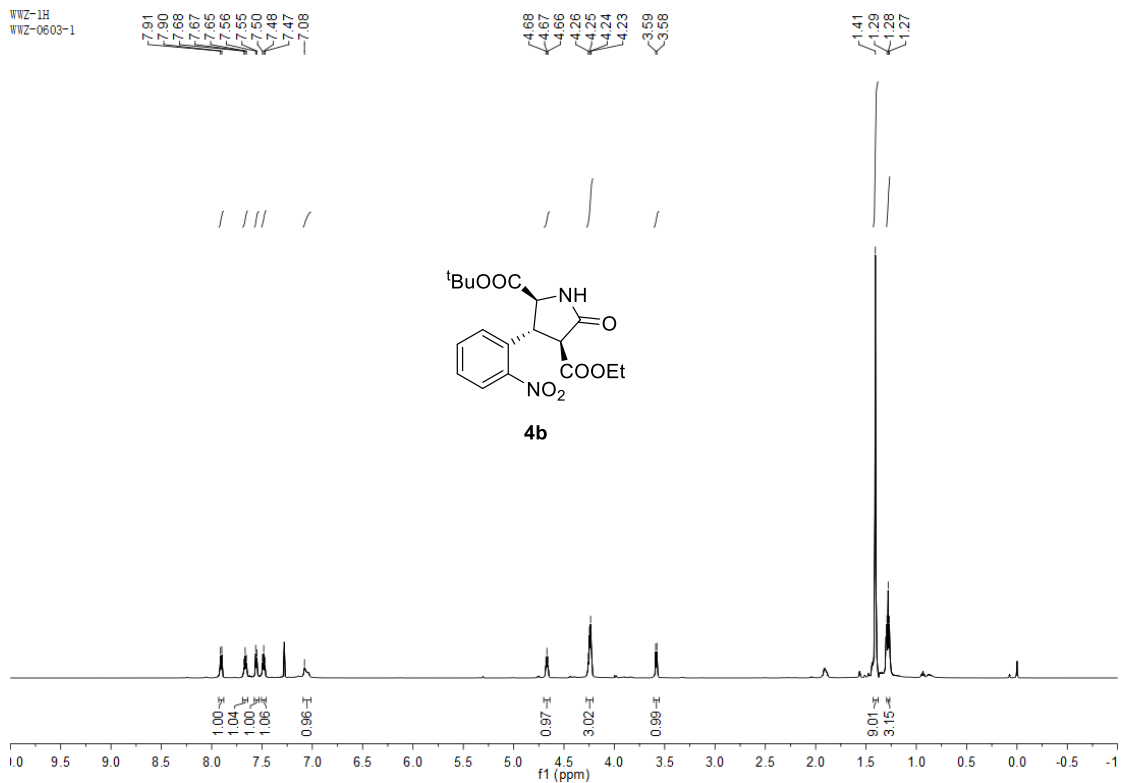

WWZ-13C  
WWZ-0603-1

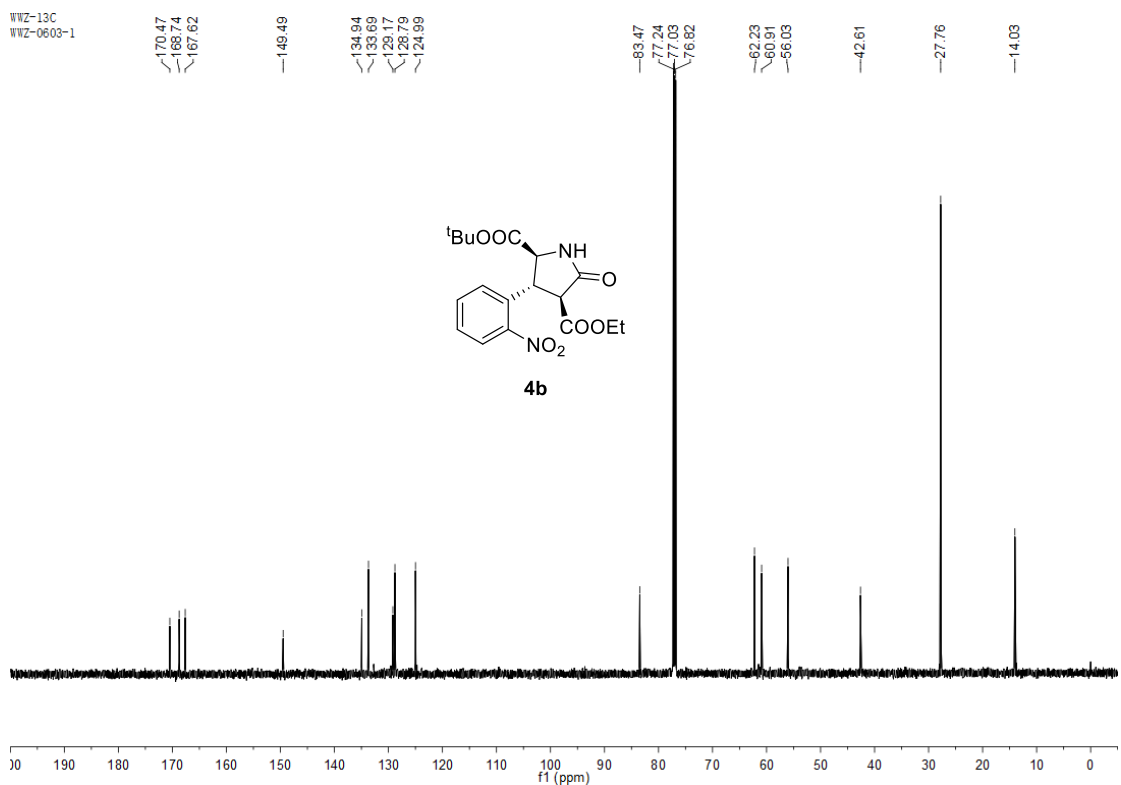

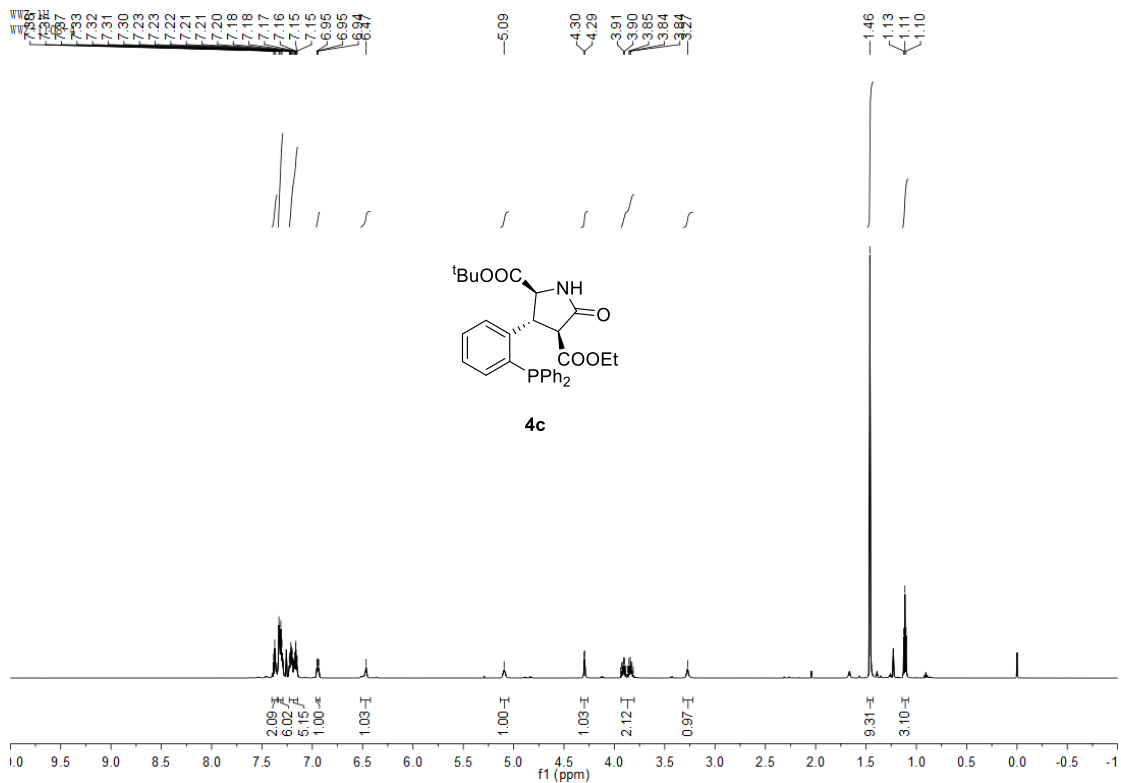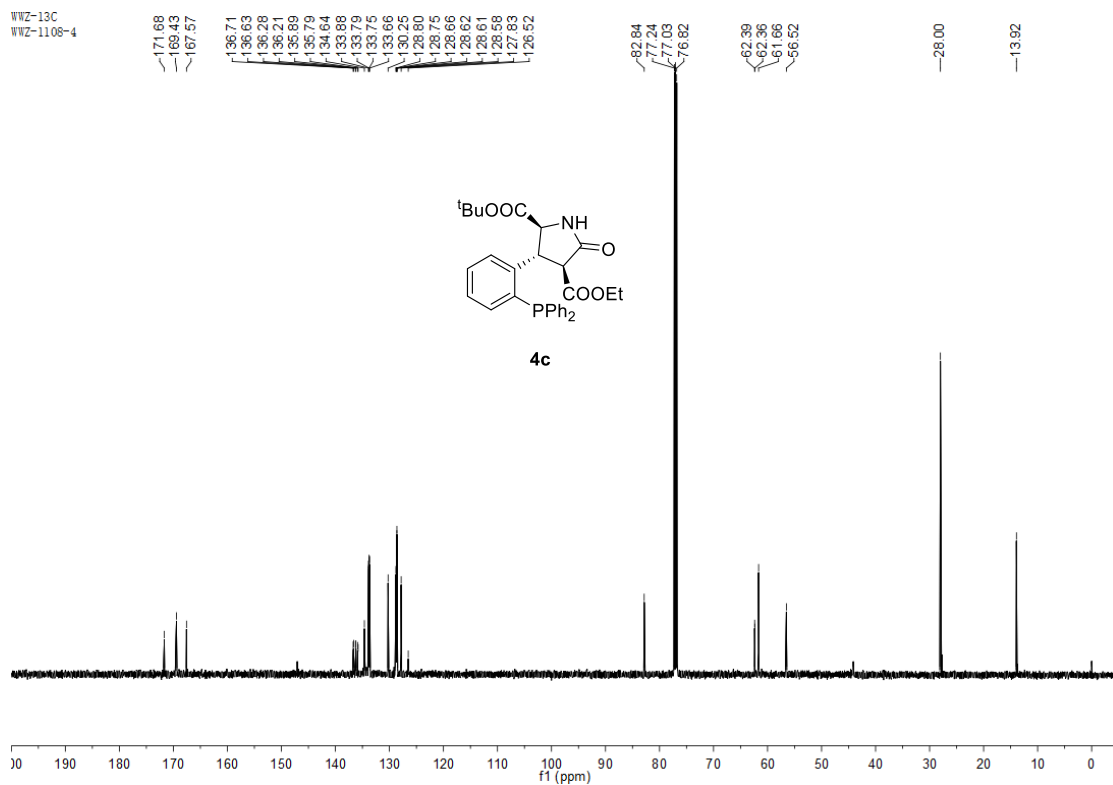

WWZ-1H  
WWZ-1122-1

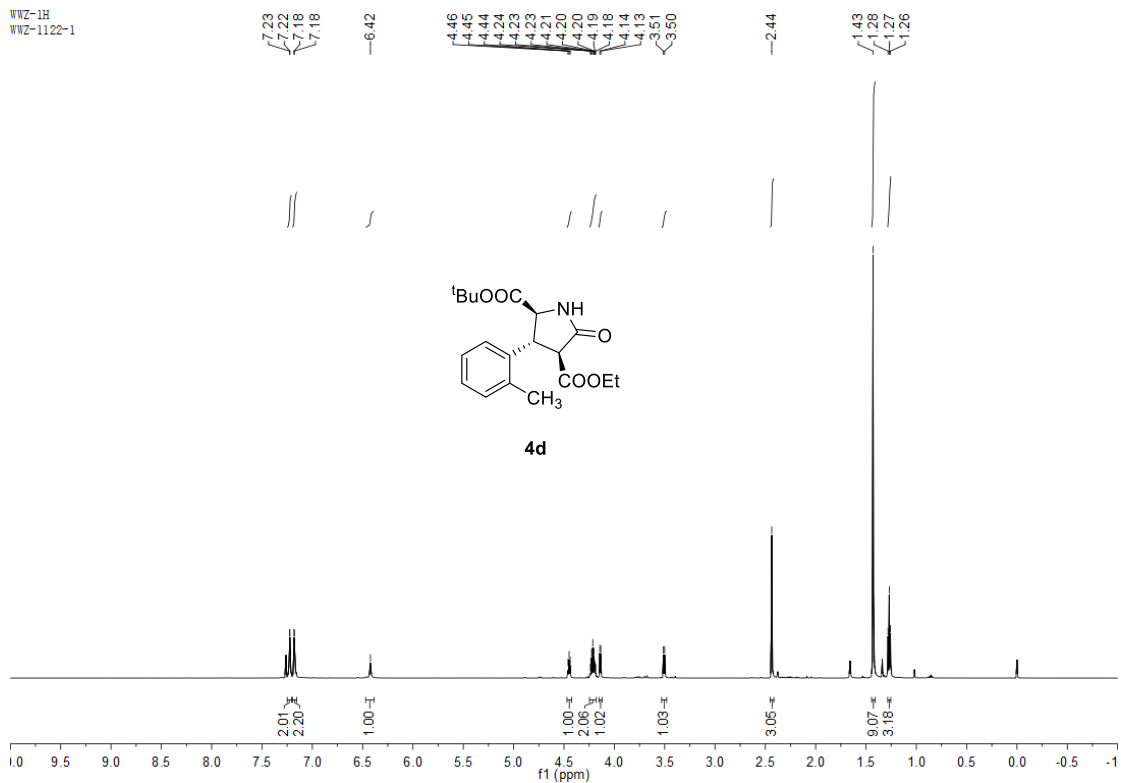

WWZ-13C  
WWZ-1122-1

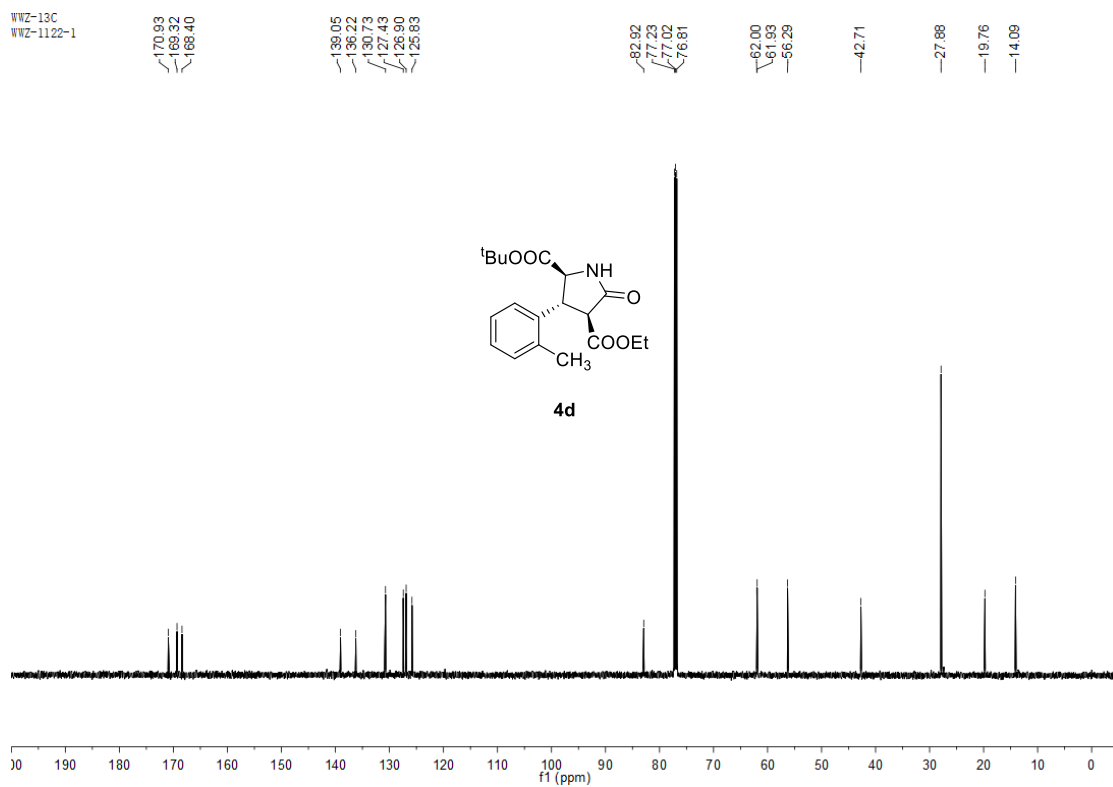

WWZ-1H  
WWZ-0603-2

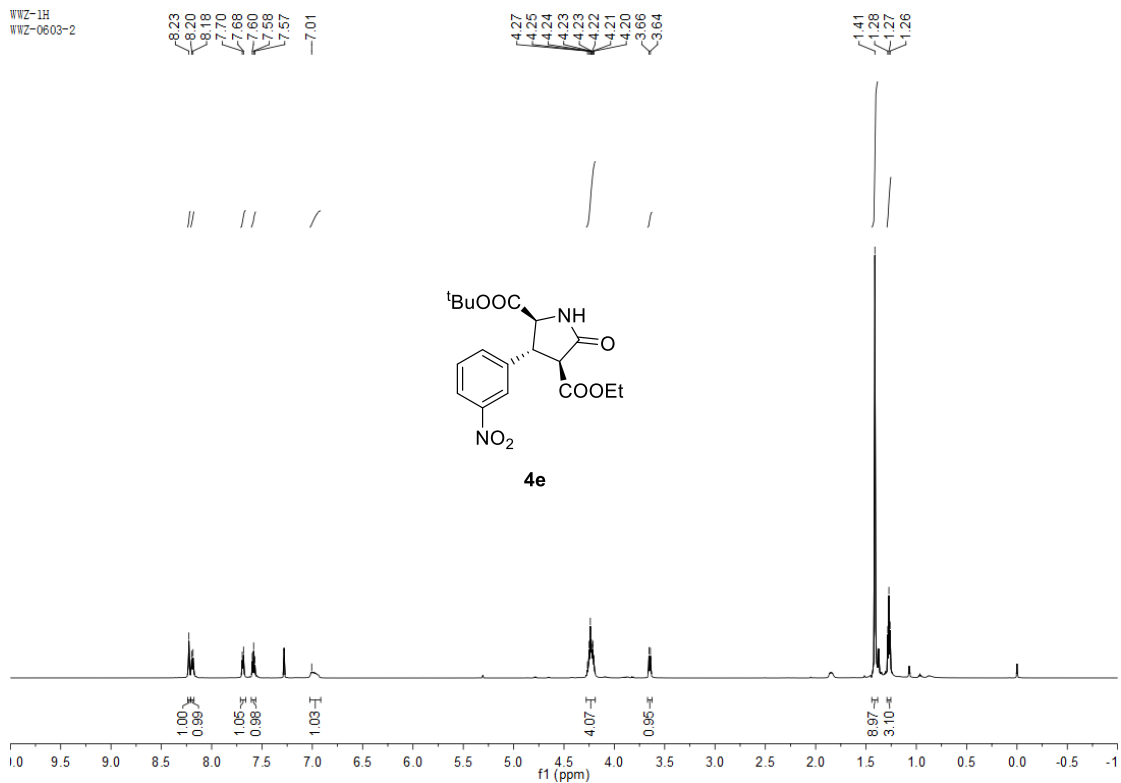

WWZ-13C  
WWZ-0603-2

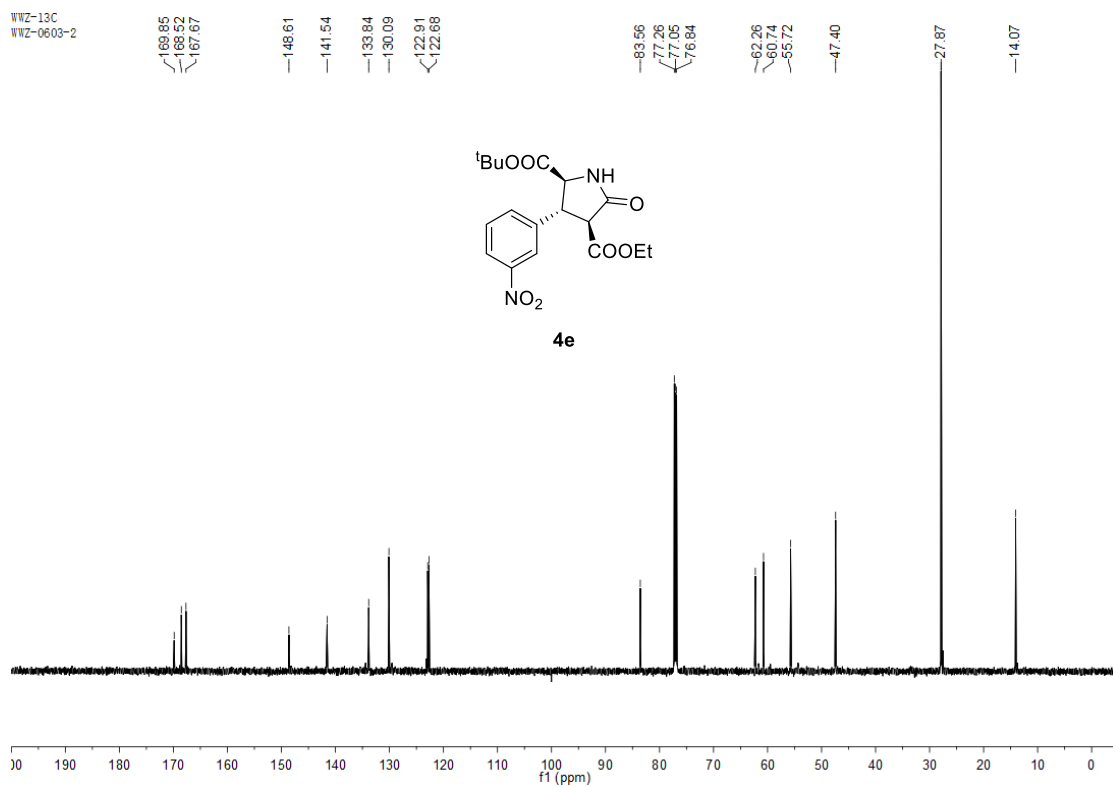

WWZ-1H  
WWZ-1103-1

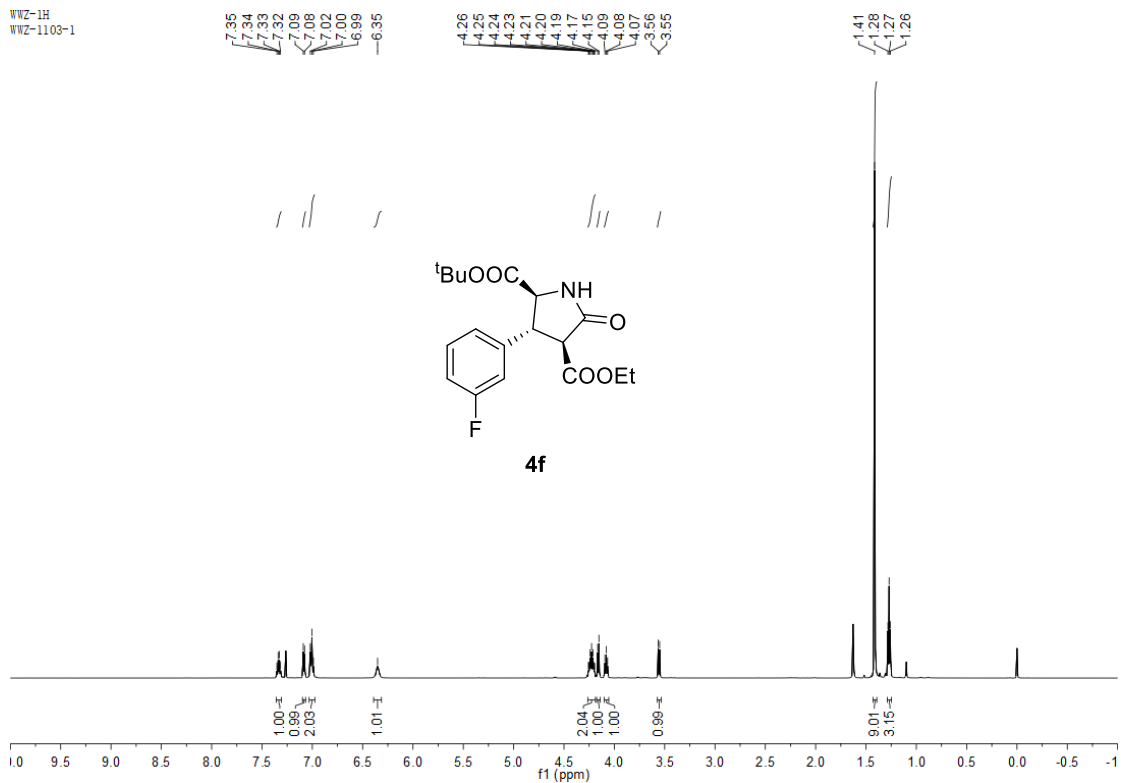

WWZ-13C  
WWZ-1103-1

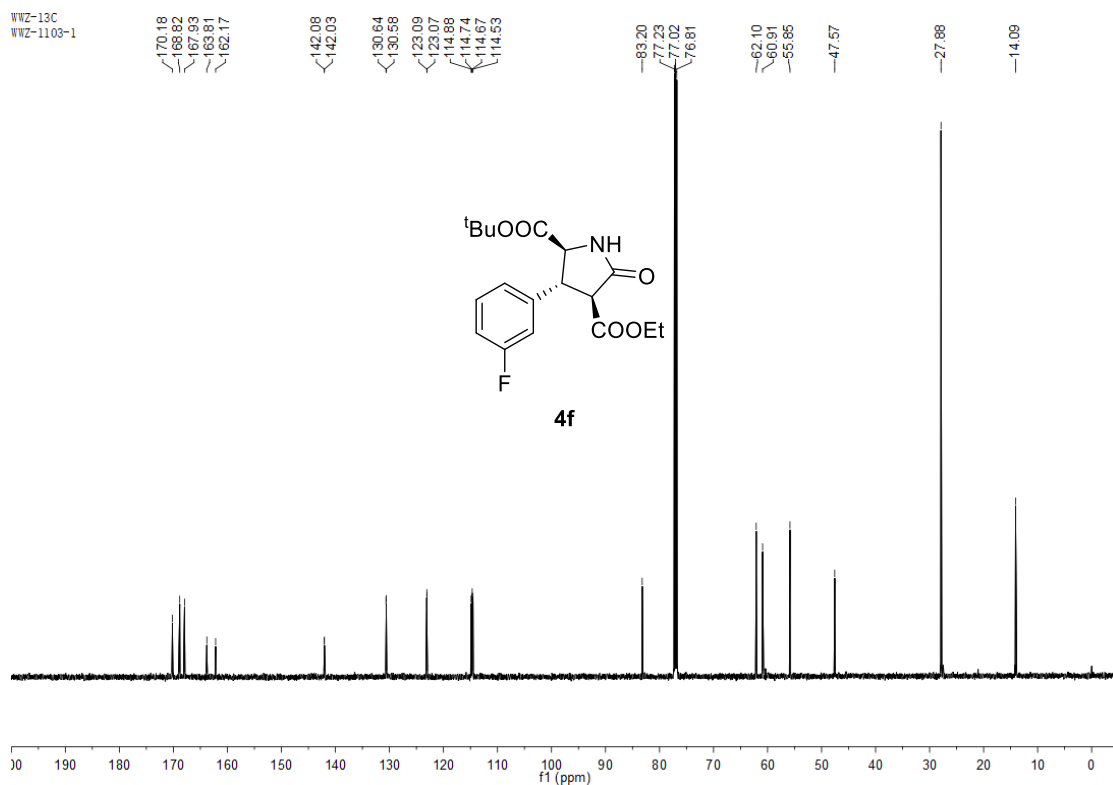

WWZ-1H  
WWZ-1103-22

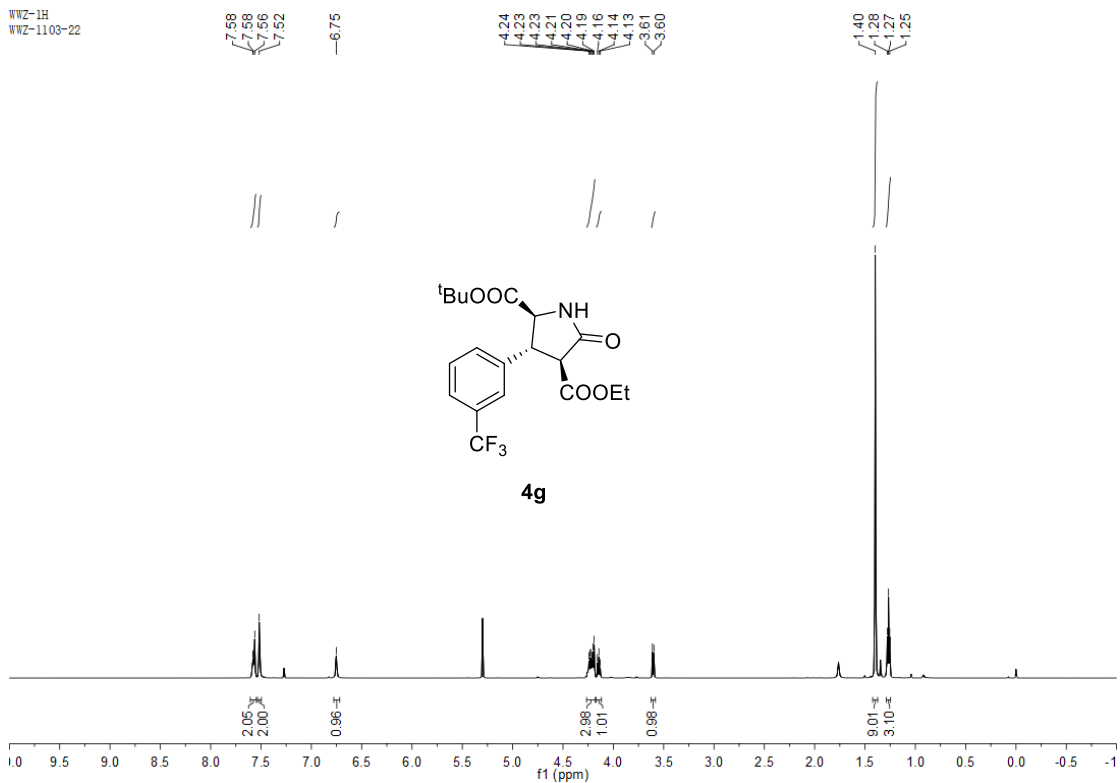

WWZ-13C  
WWZ-1103-2

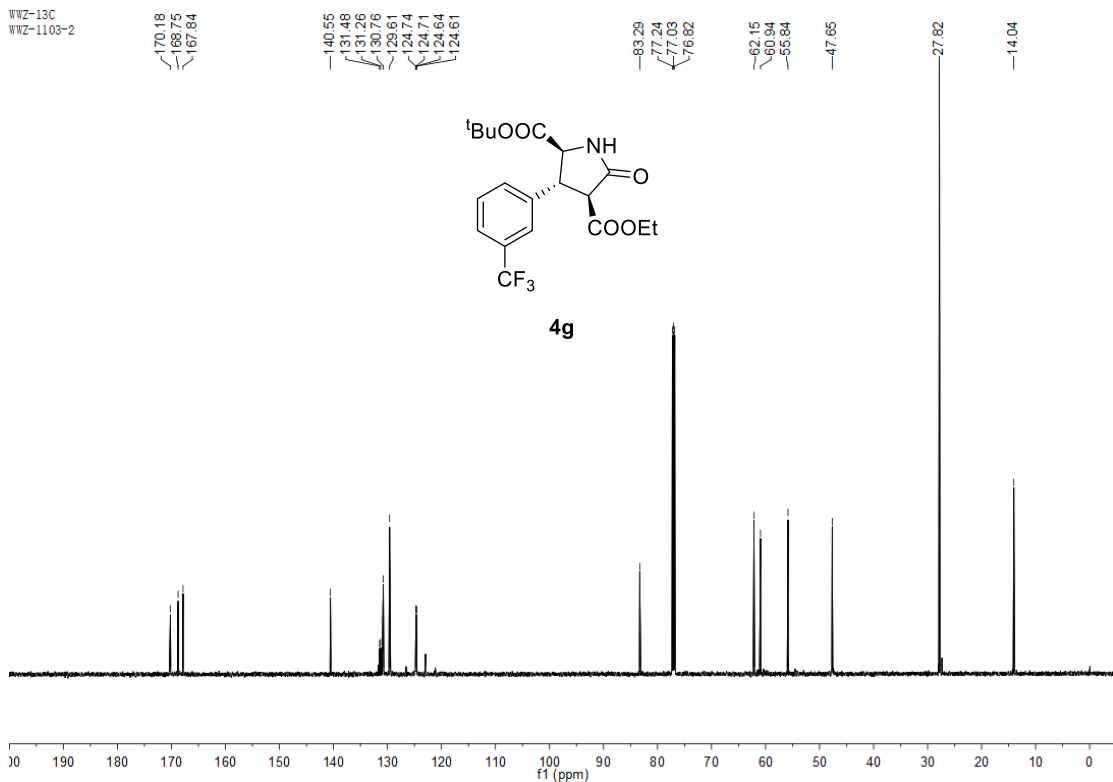

WWZ-1H  
WWZ-0609-2

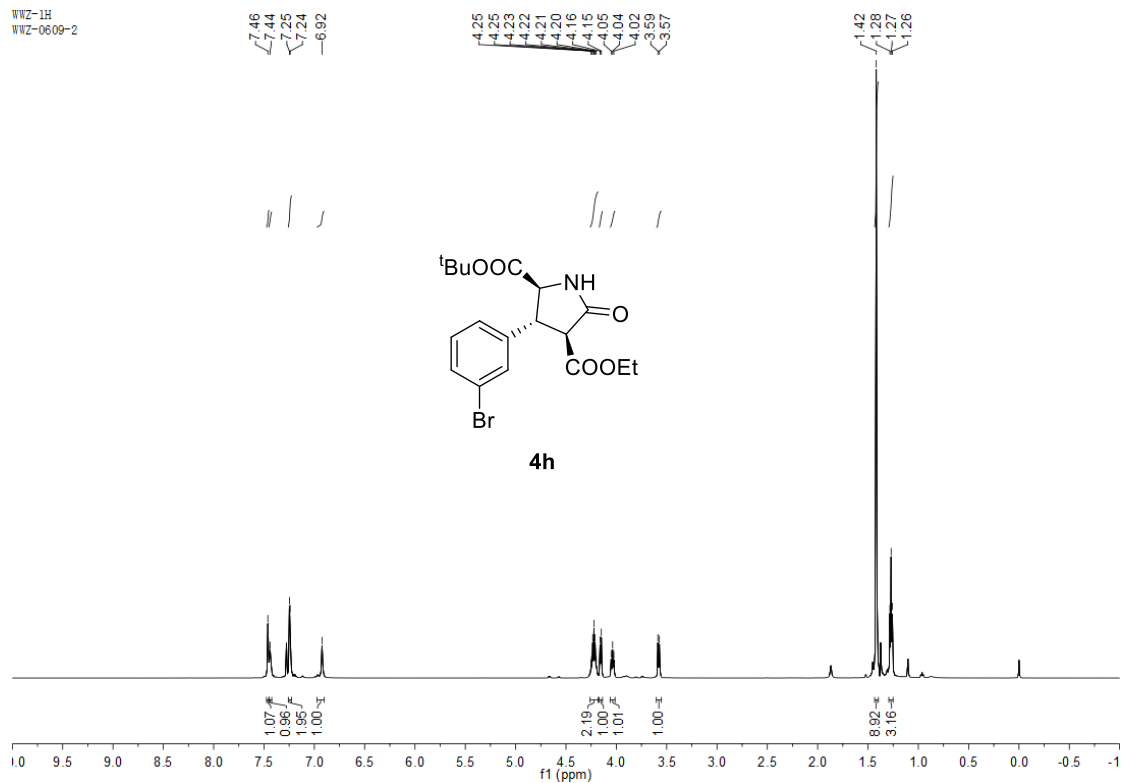

WWZ-13C  
WWZ-0609-2

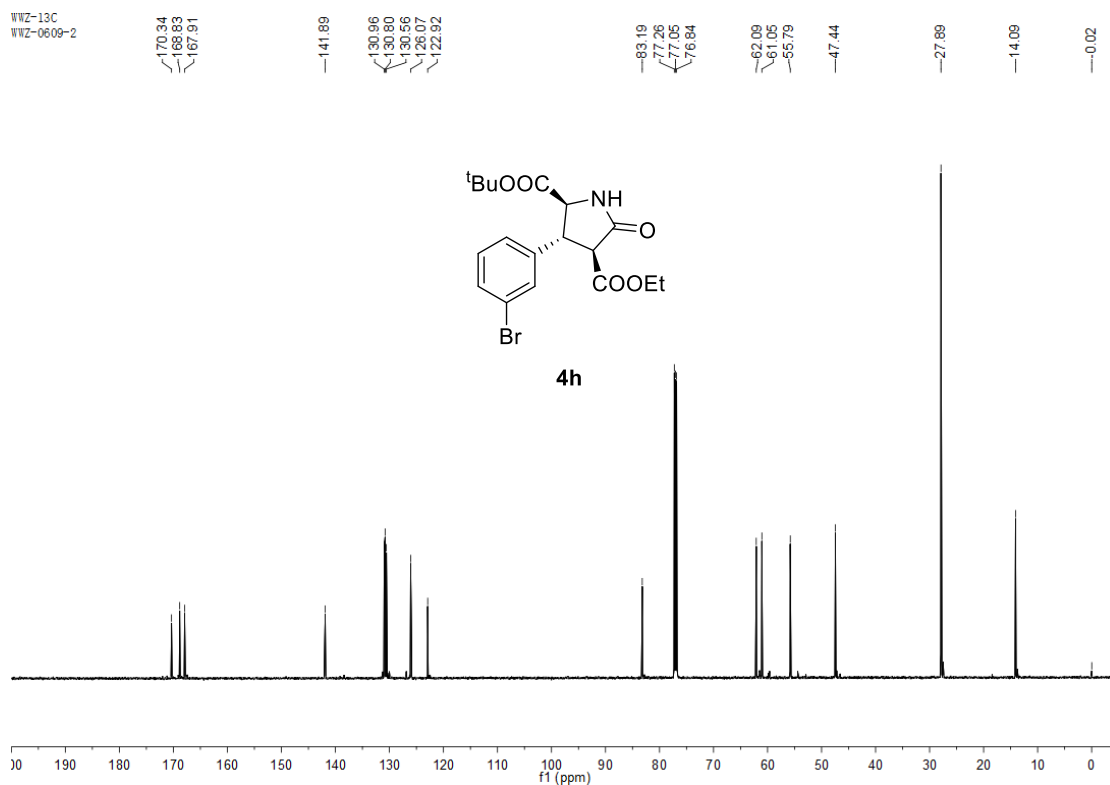



WWZ-1H  
WWZ-0524-1

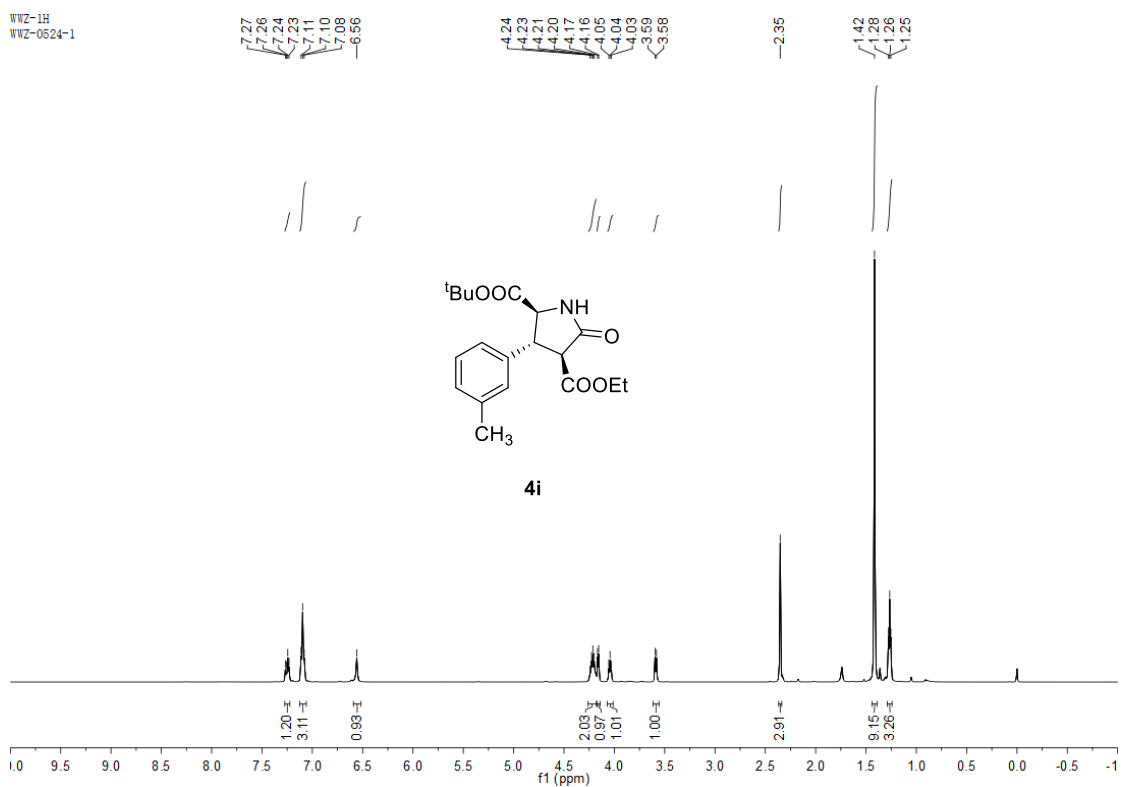

WWZ-13C  
WWZ-0524-1

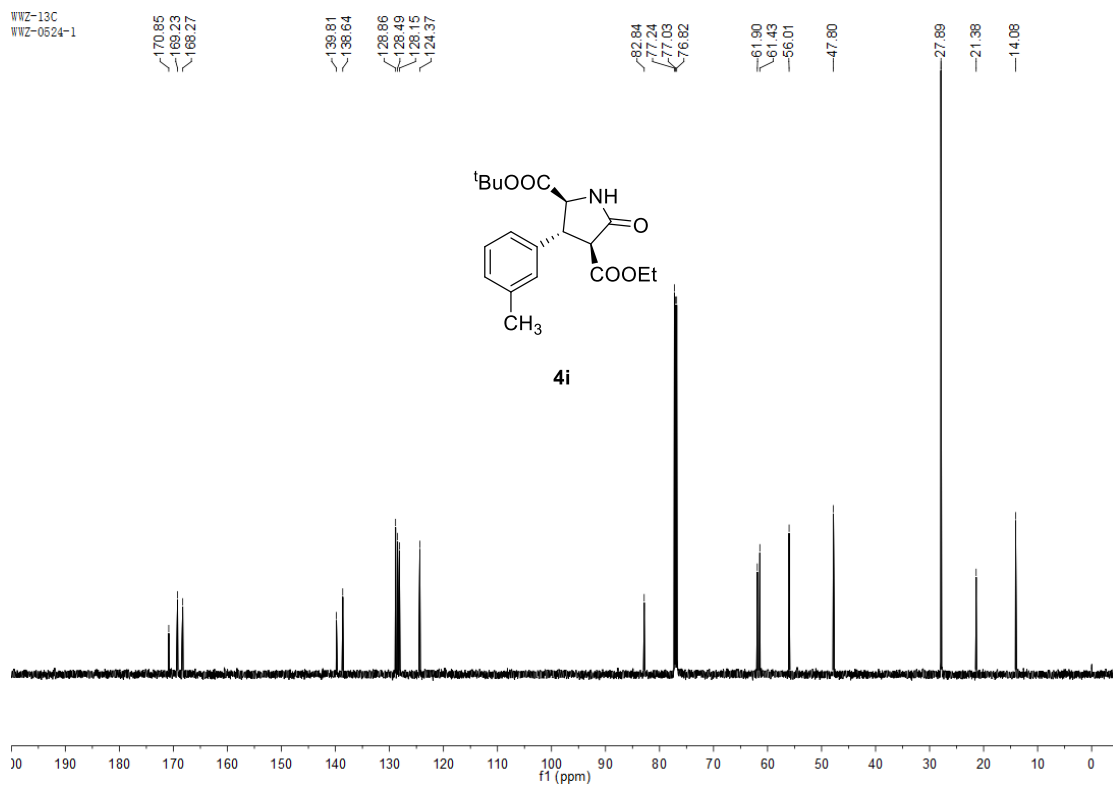

WWZ-1H  
WWZ-1108-1

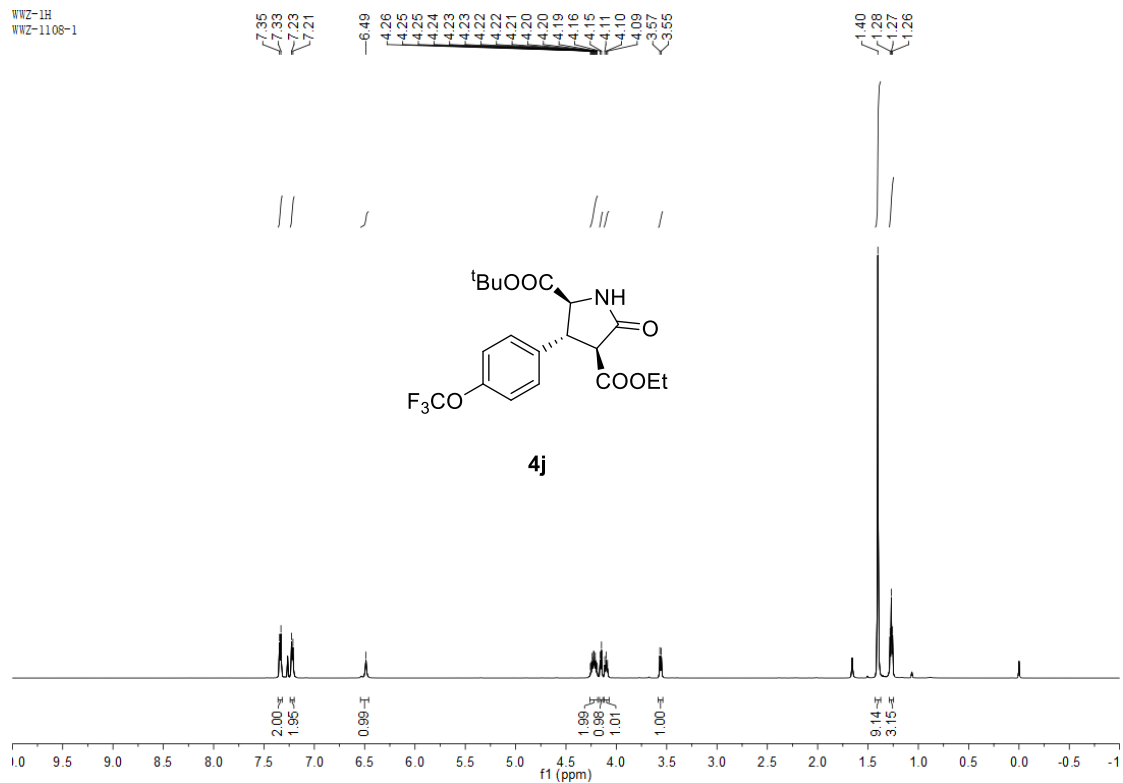

WWZ-13C  
WWZ-1108-1

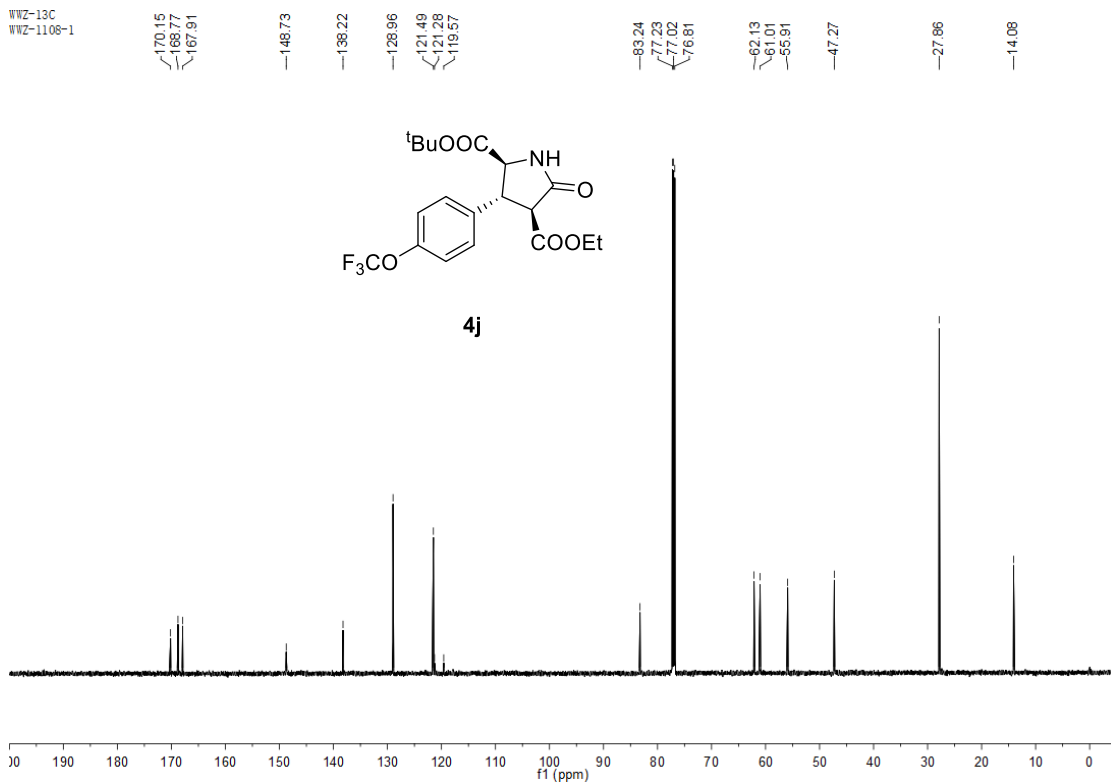

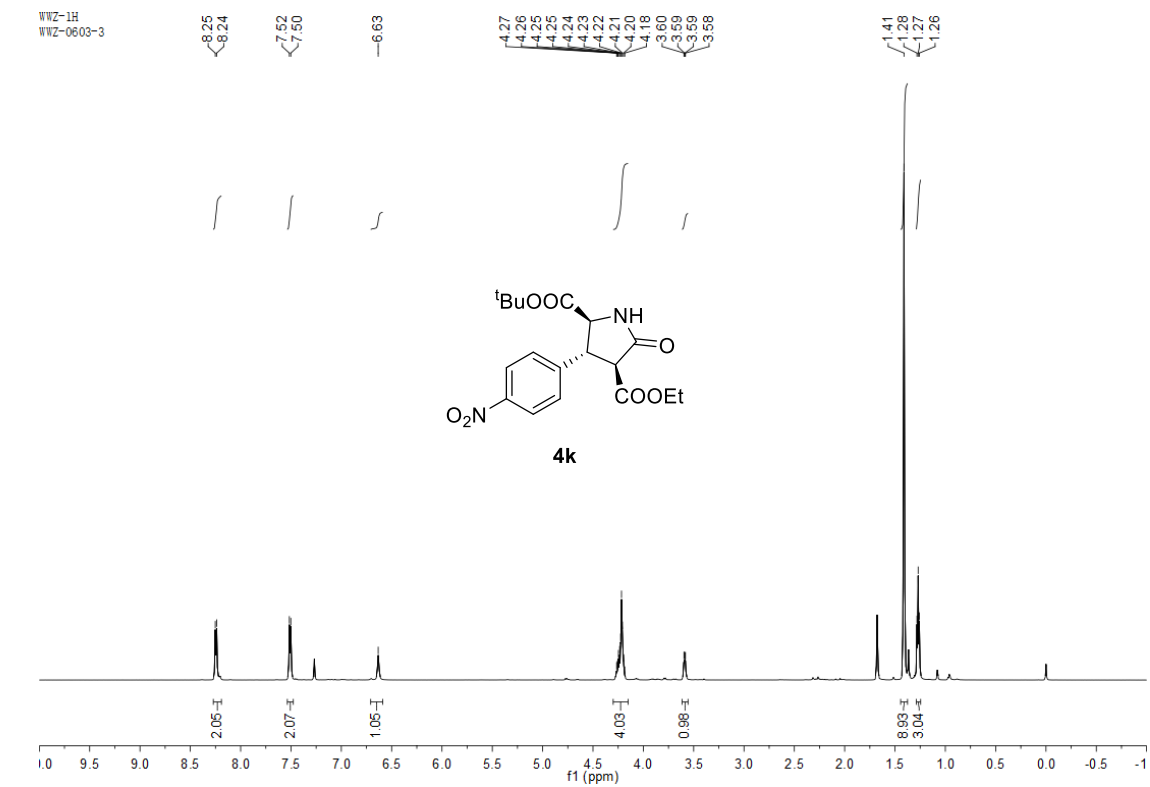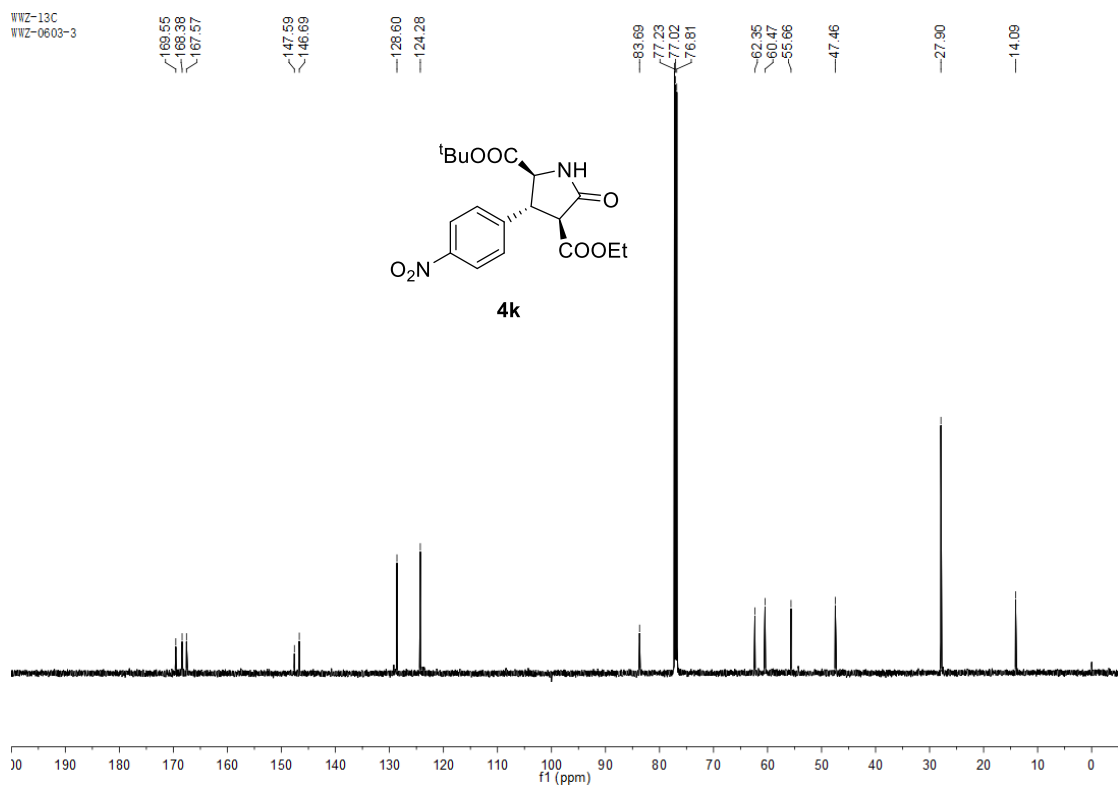

WWZ-1H  
WWZ-0627-2

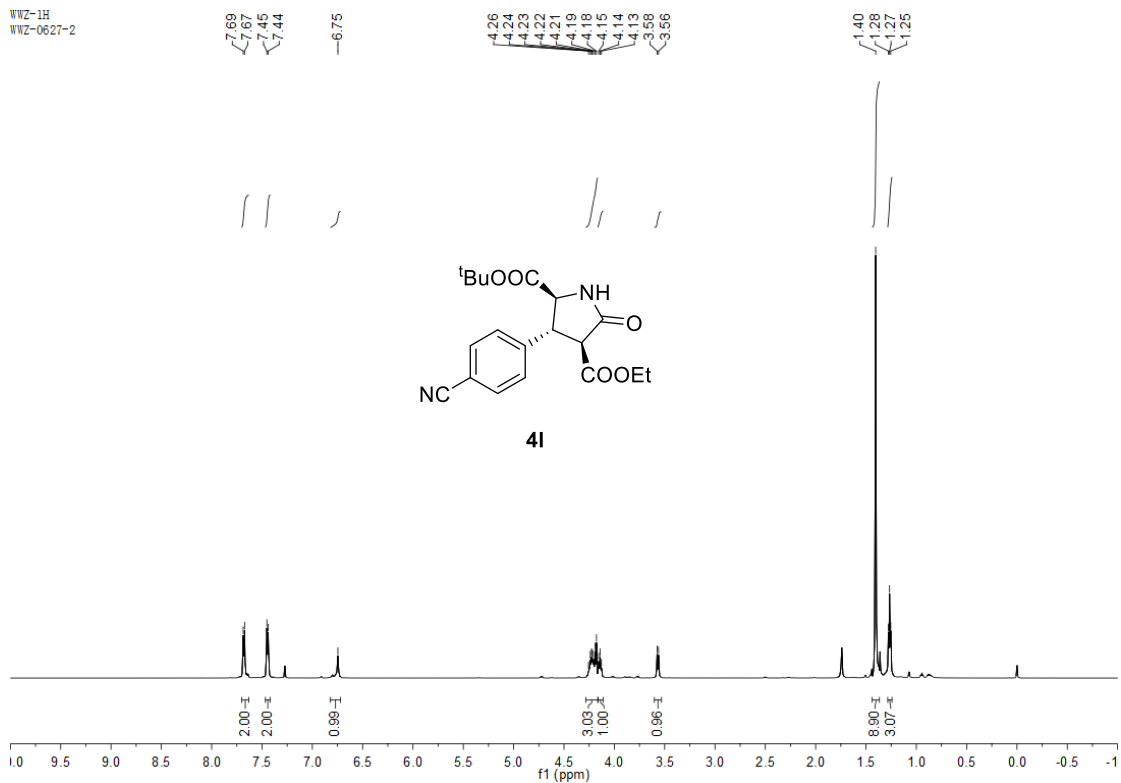

WWZ-13C  
WWZ-0627-2

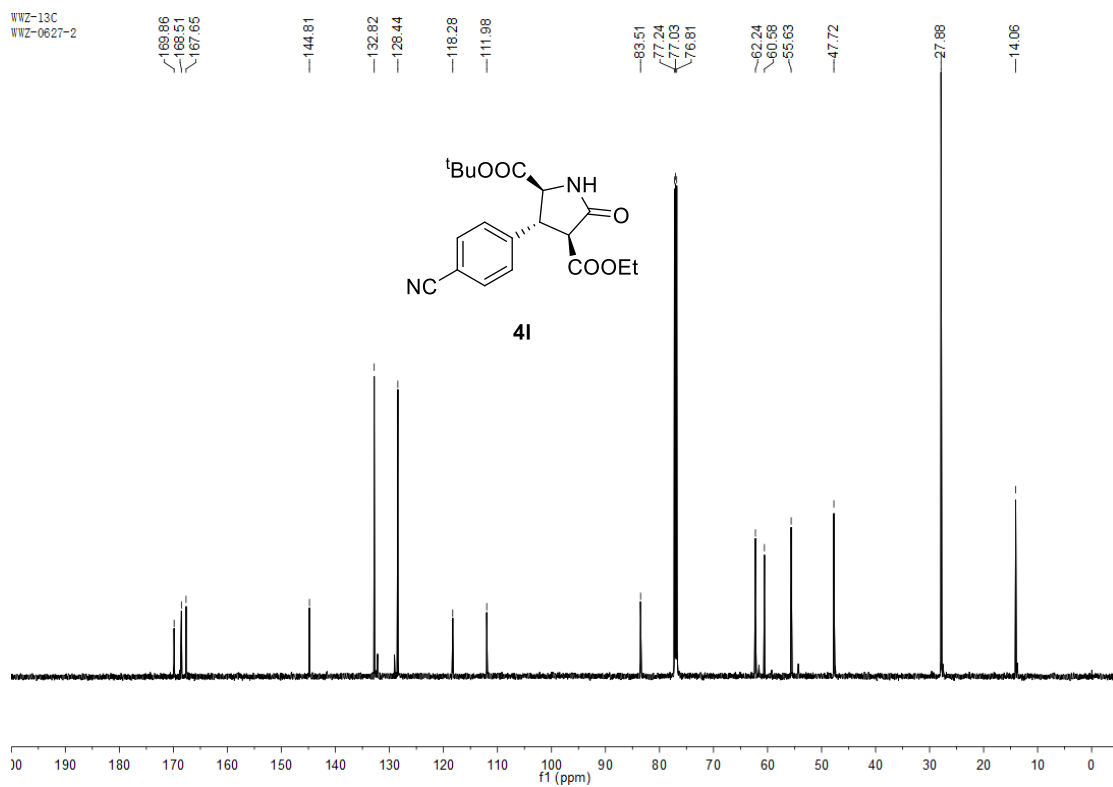

WWZ-1H  
WWZ-0519-1

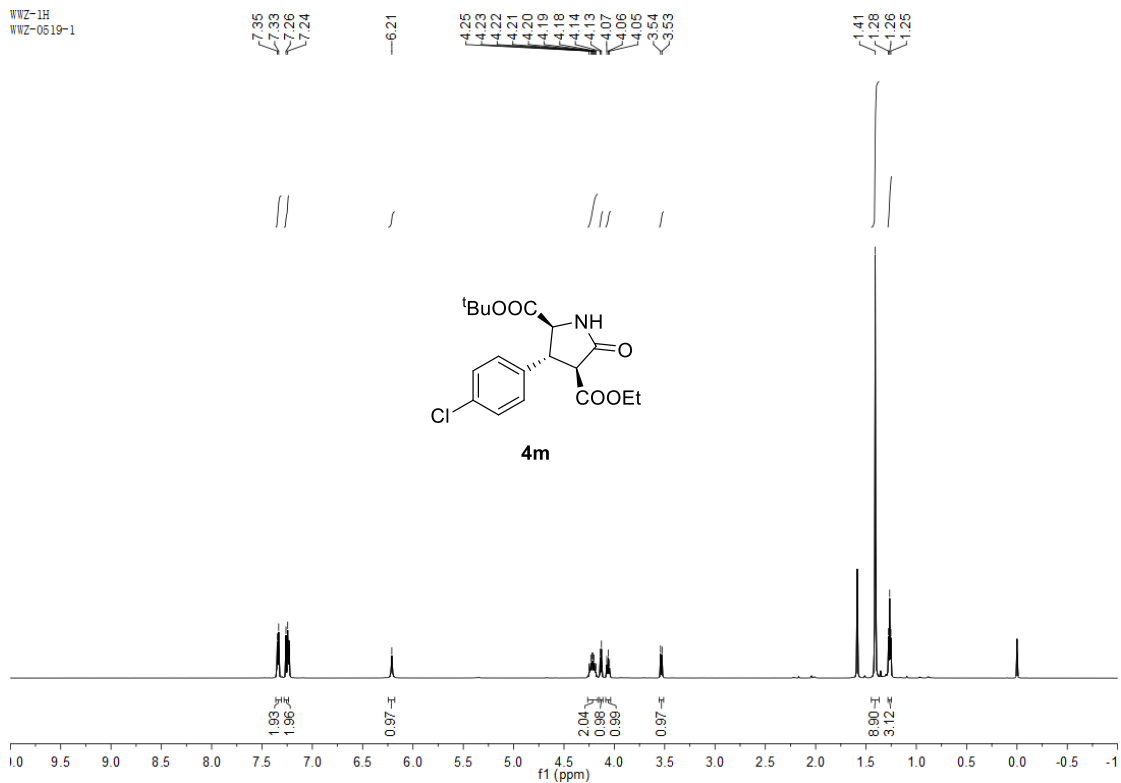

WWZ-13C  
WWZ-0519-1

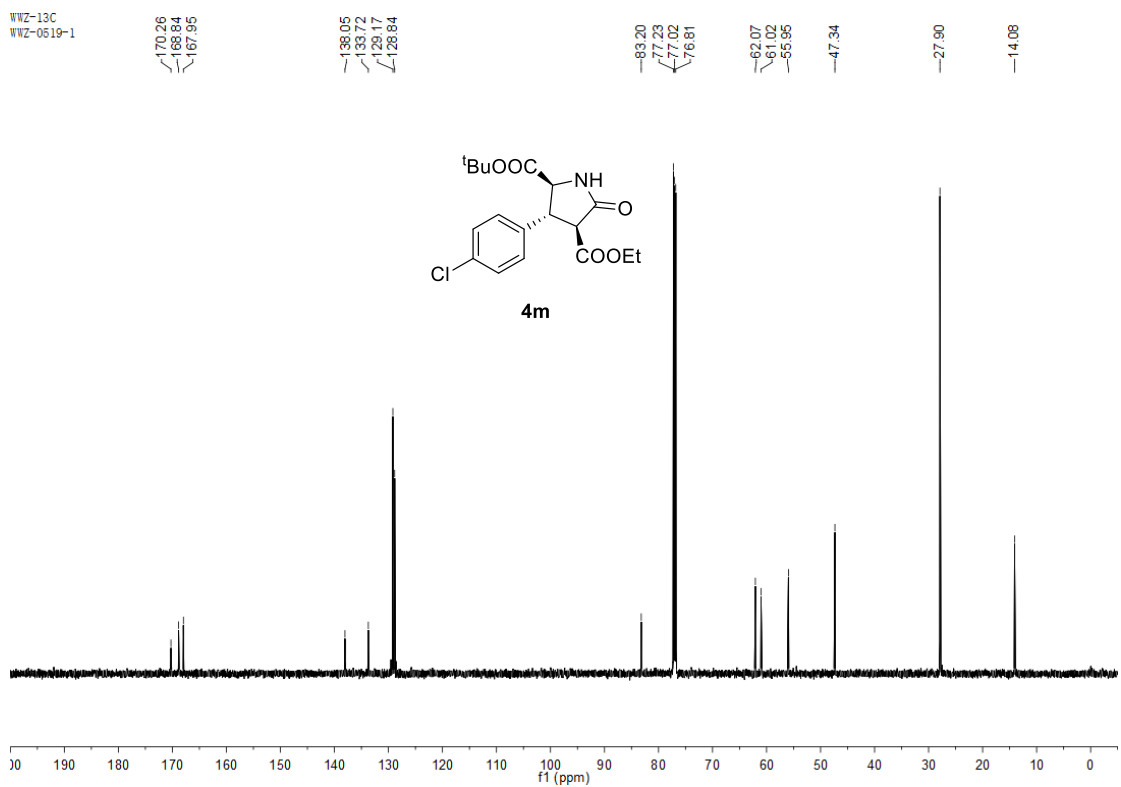

WWZ-1H  
WWZ-0627-1

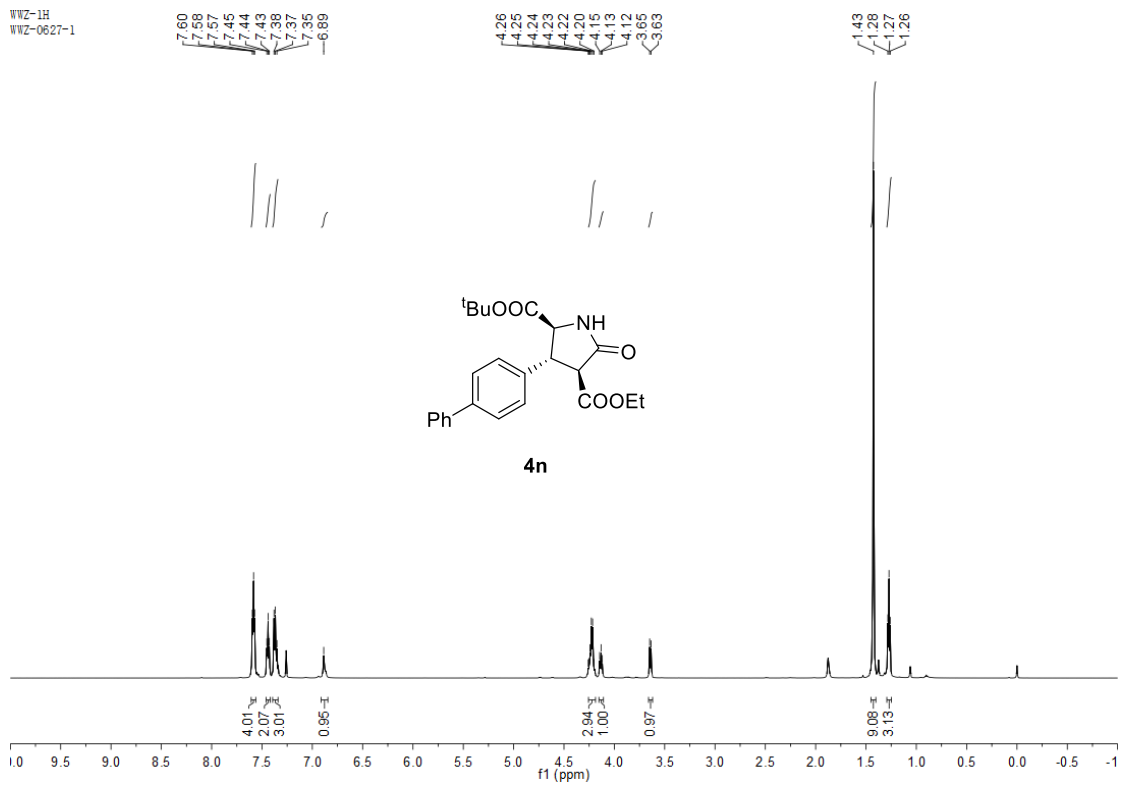

WWZ-13C  
WWZ-0627-1

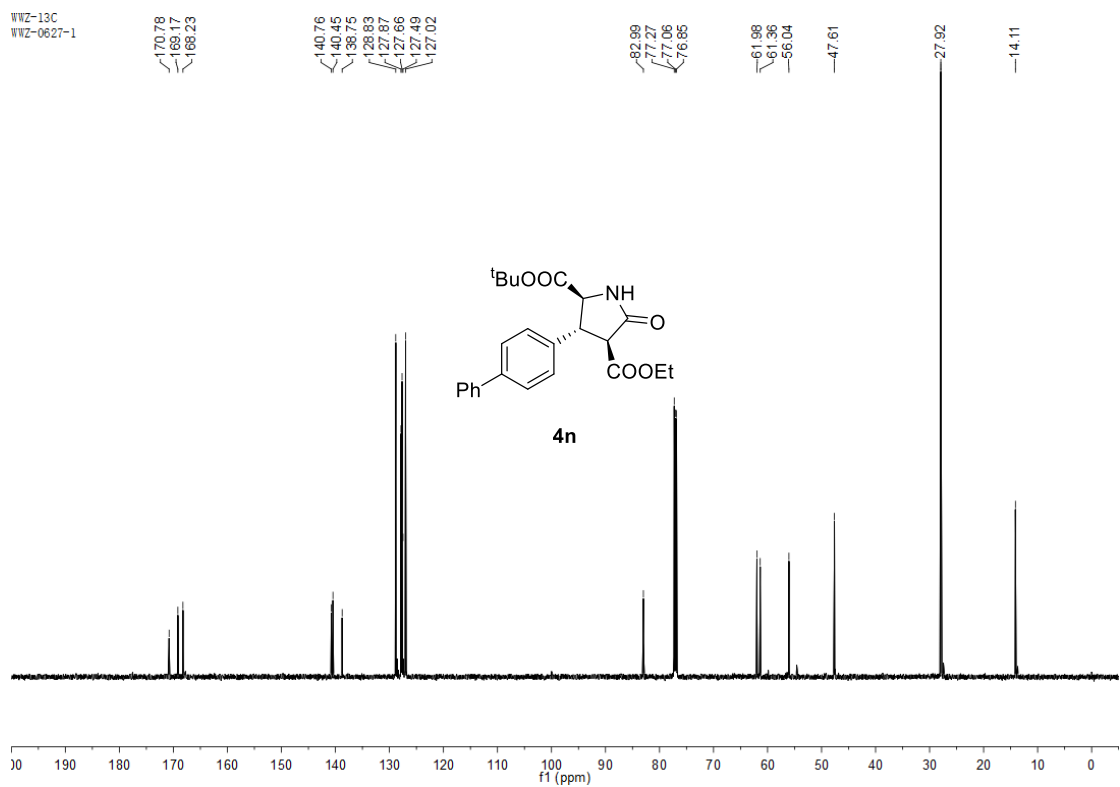

WWZ-1H  
WWZ-0510-1

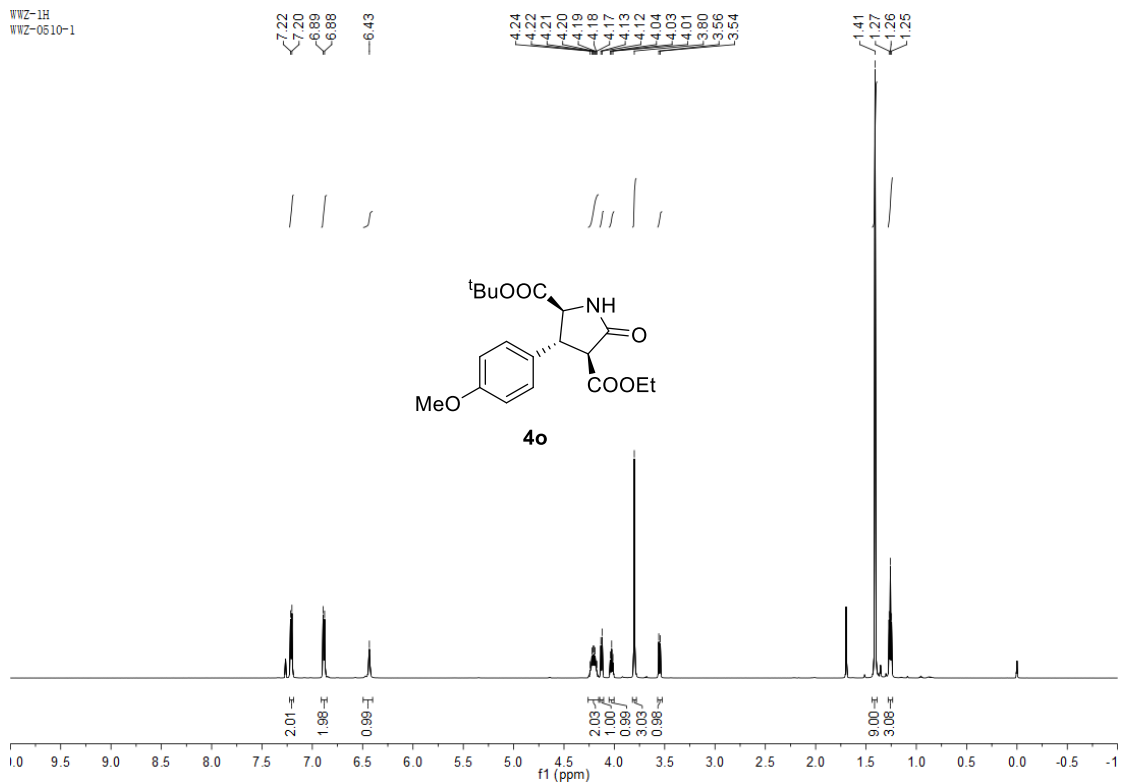

WWZ-13C  
WWZ-0510-1

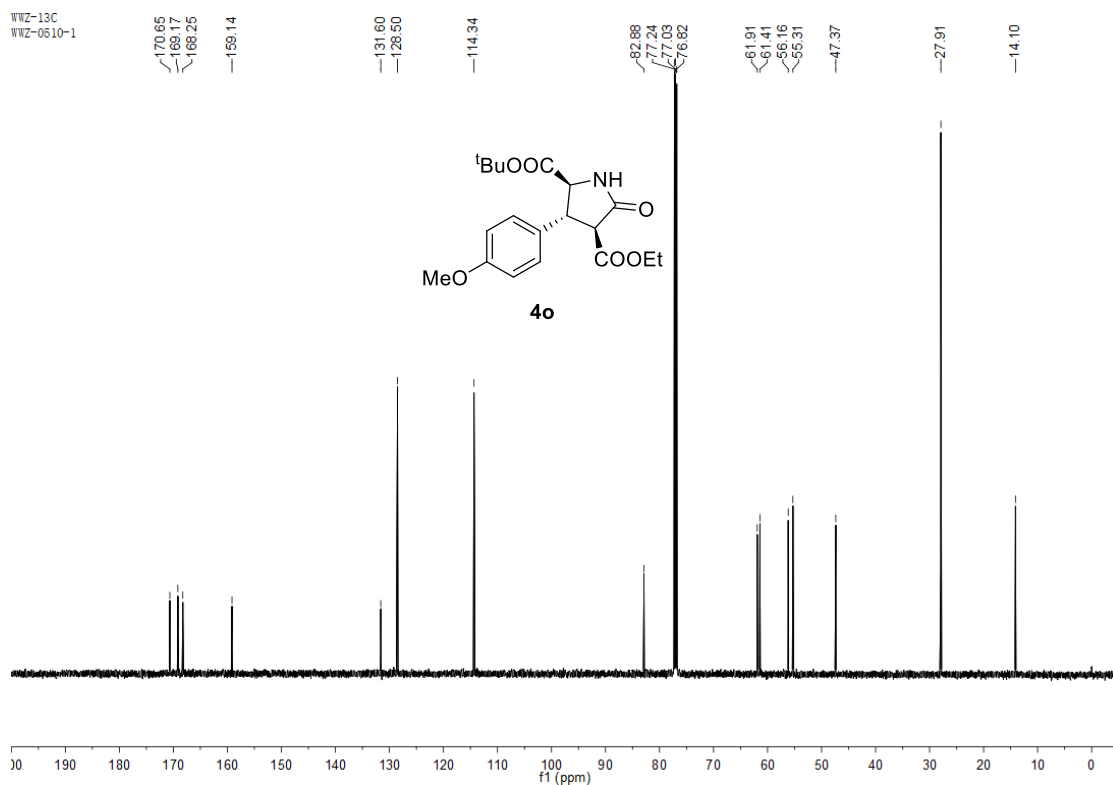

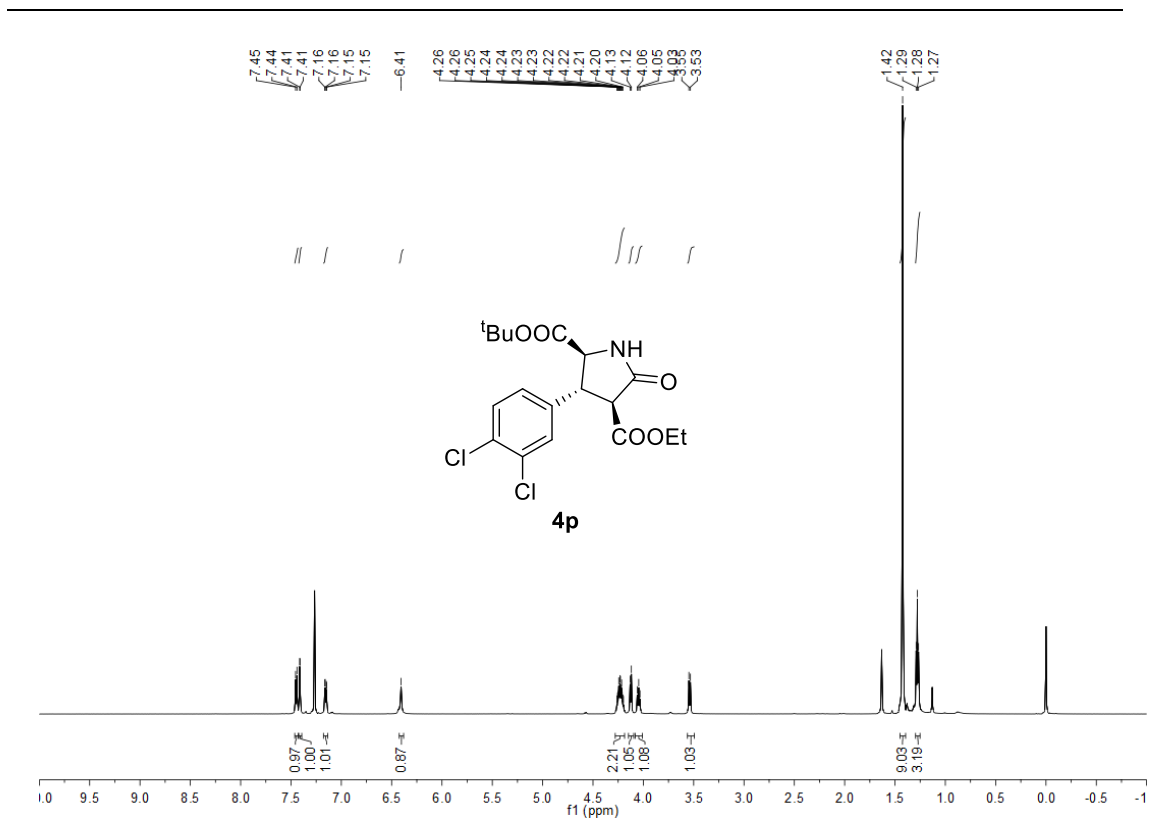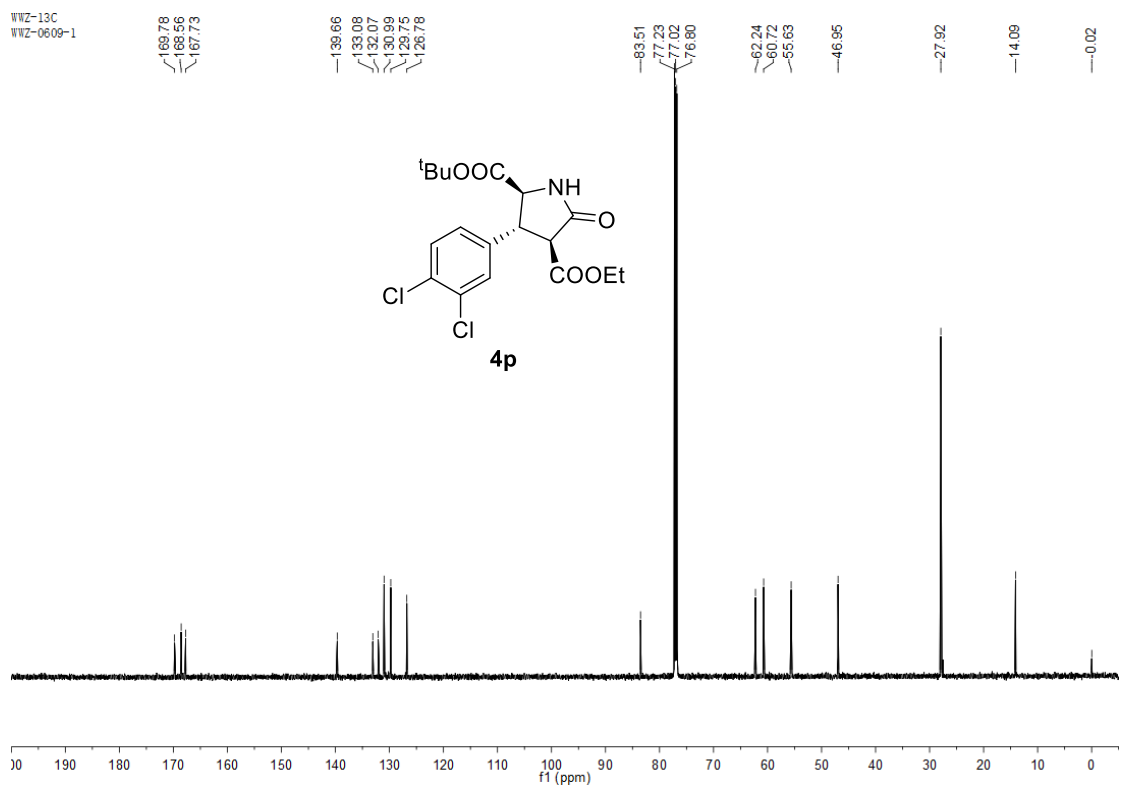



WWZ-1H  
WWZ-0613-2

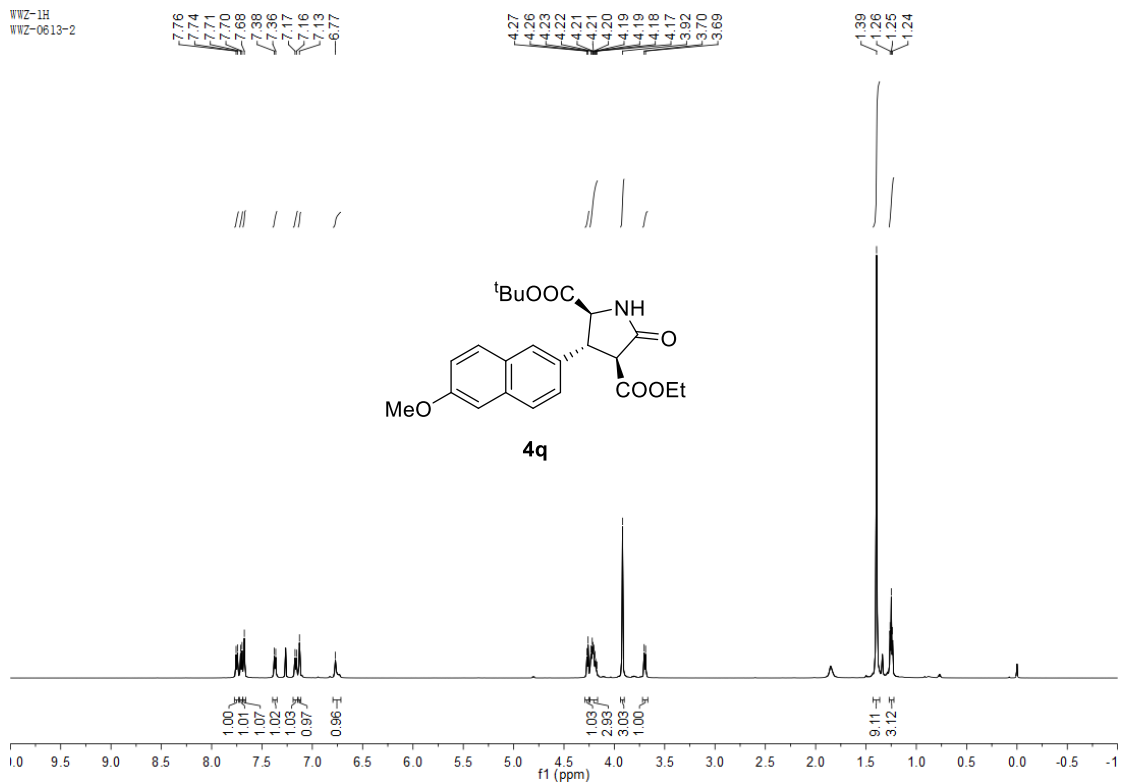

WWZ-13C  
WWZ-0613-2

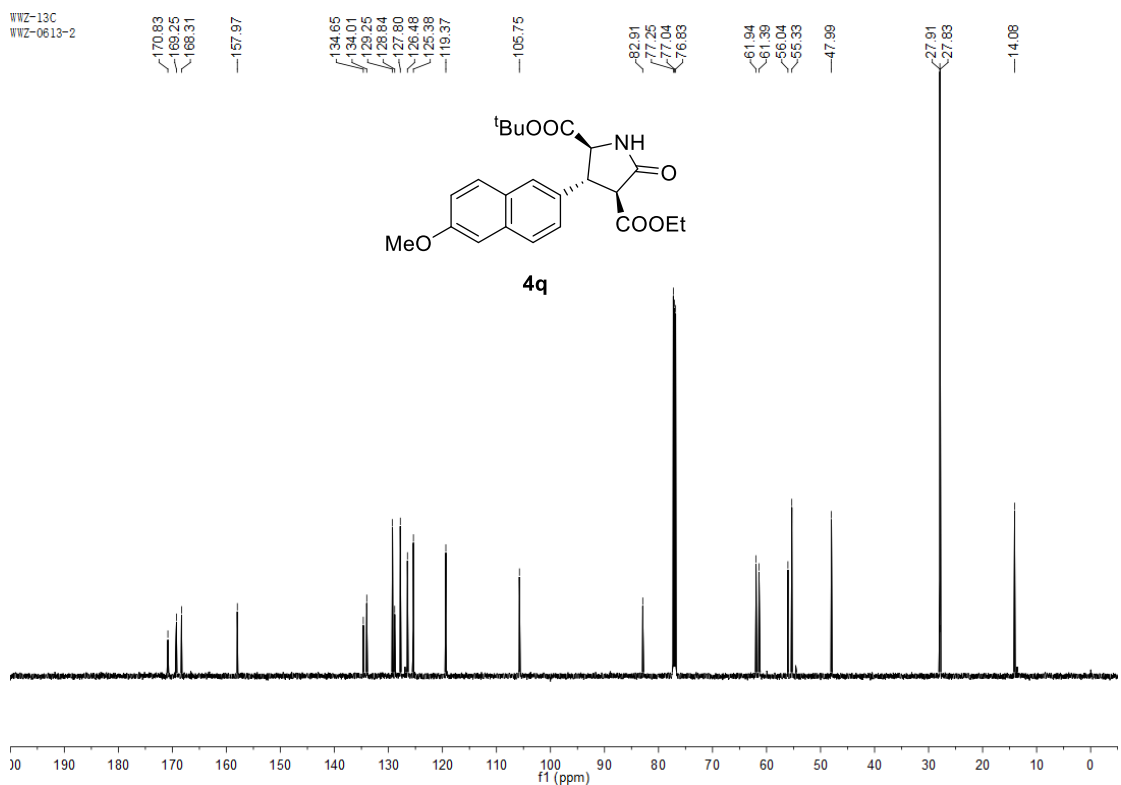

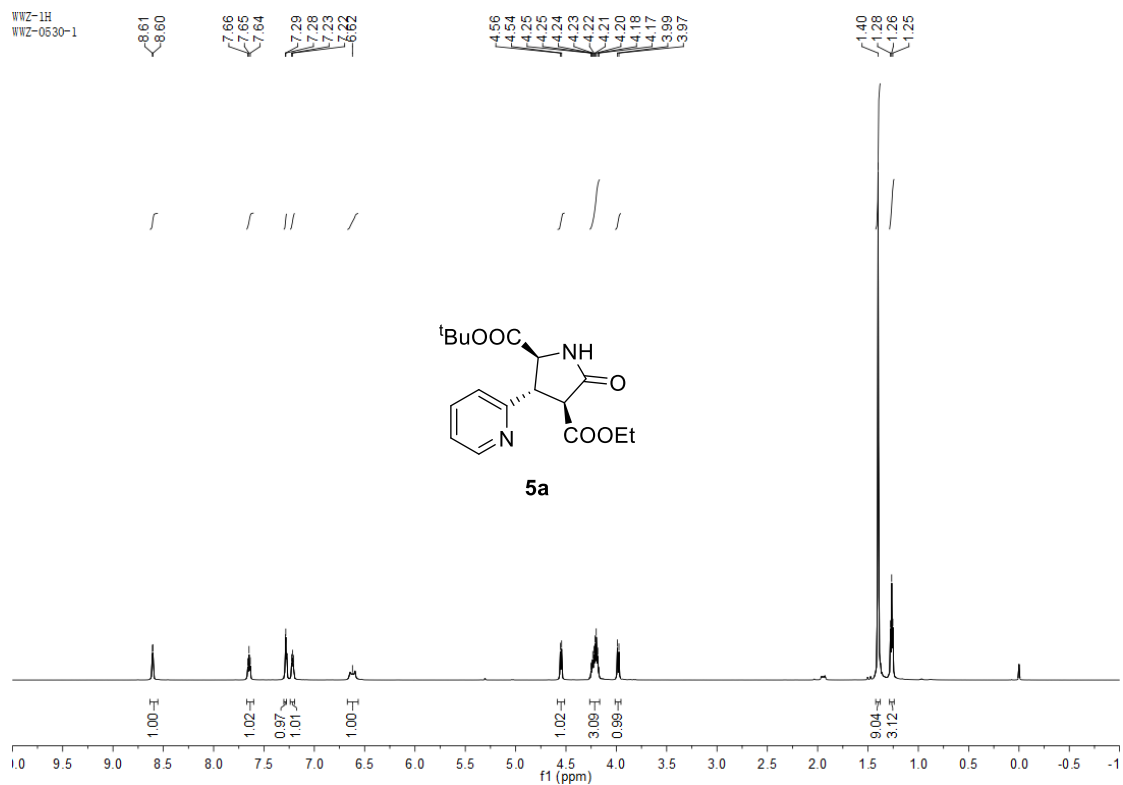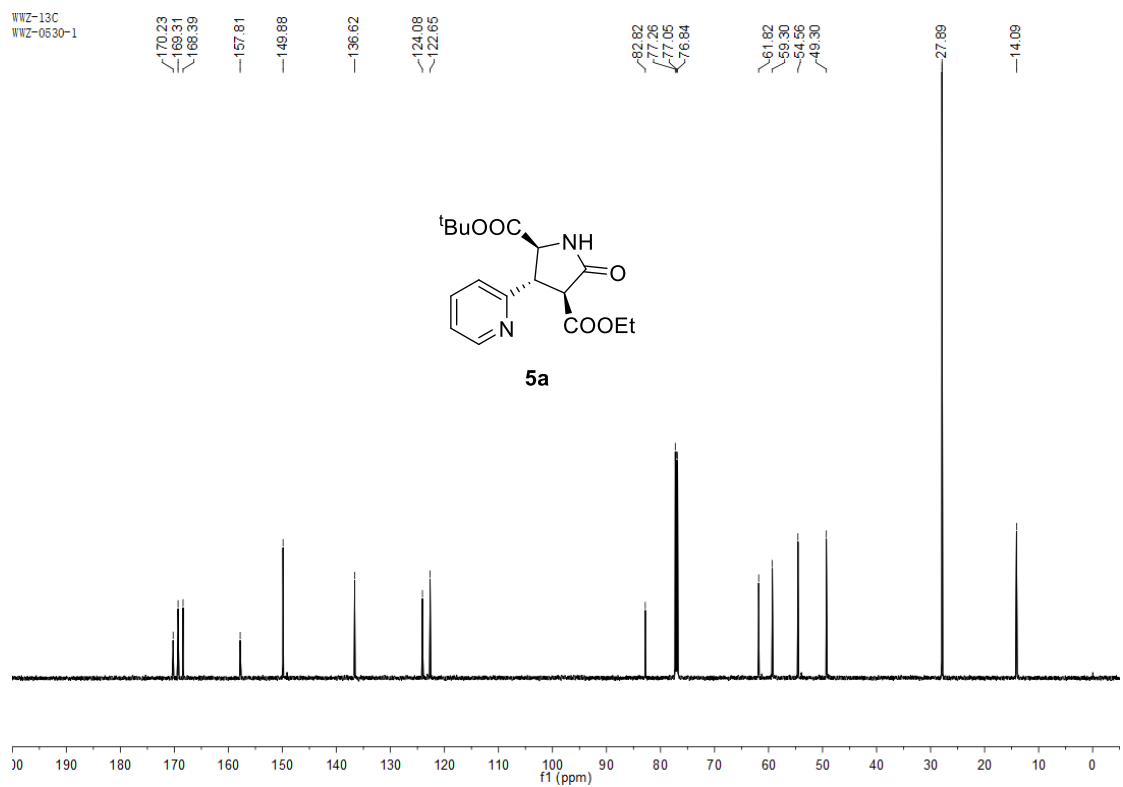

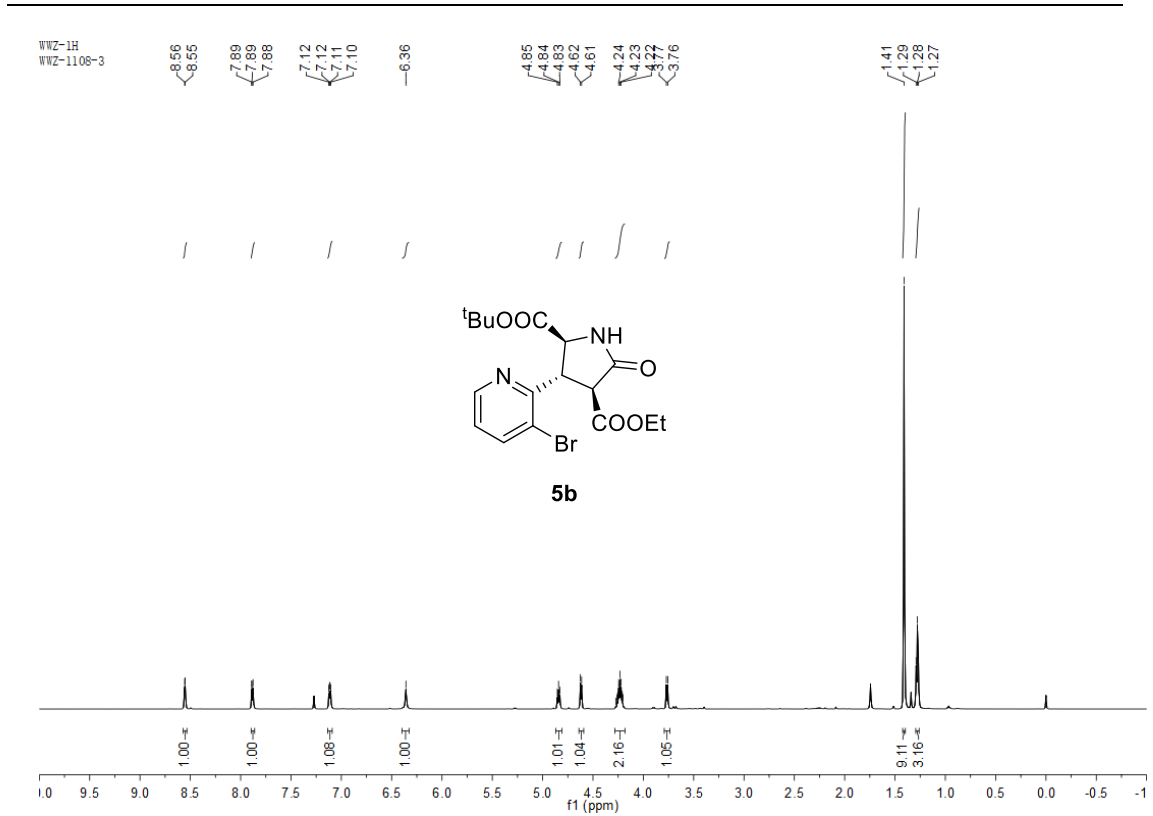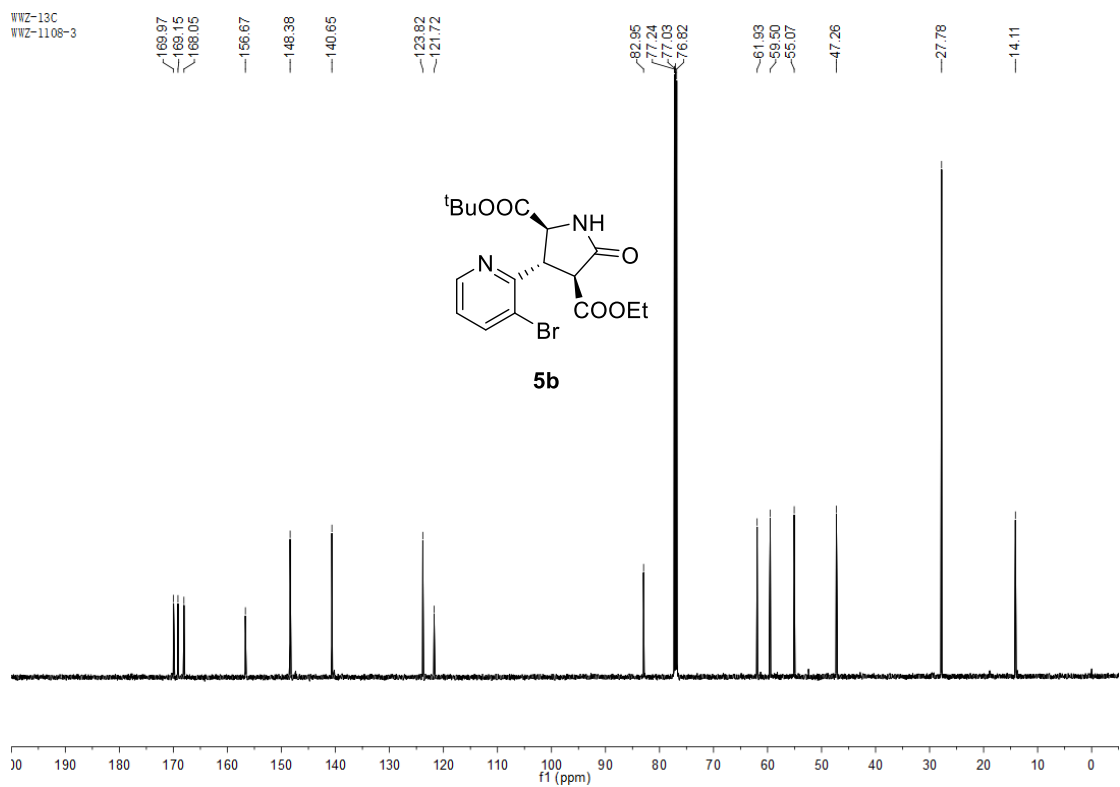

WWZ-1H  
WWZ-0530-2

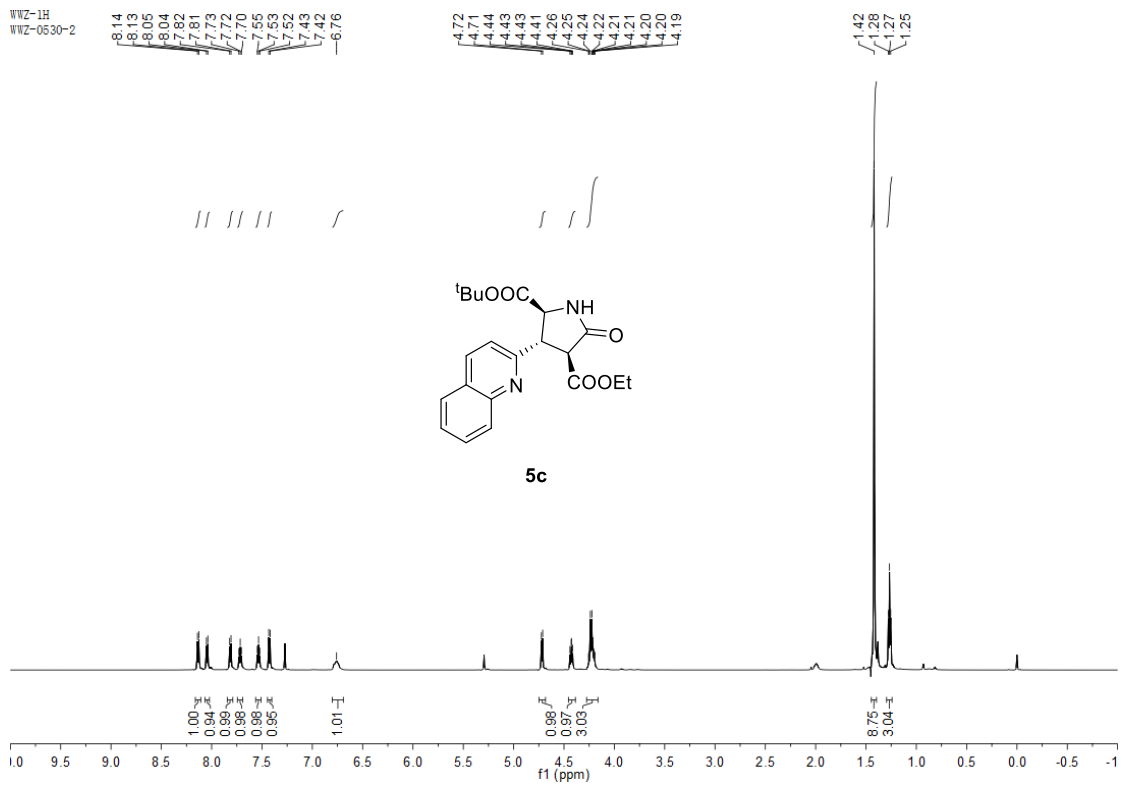

WWZ-13C  
WWZ-0530-2

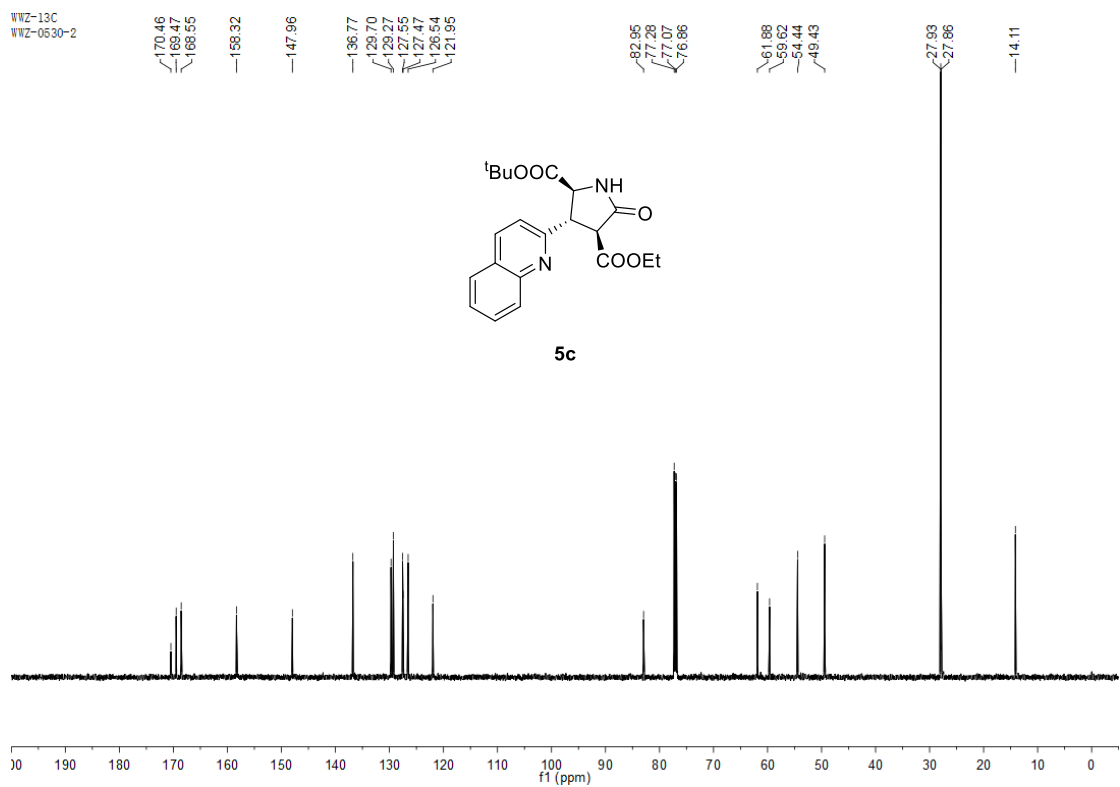

WWZ-1H  
WWZ-0621-1

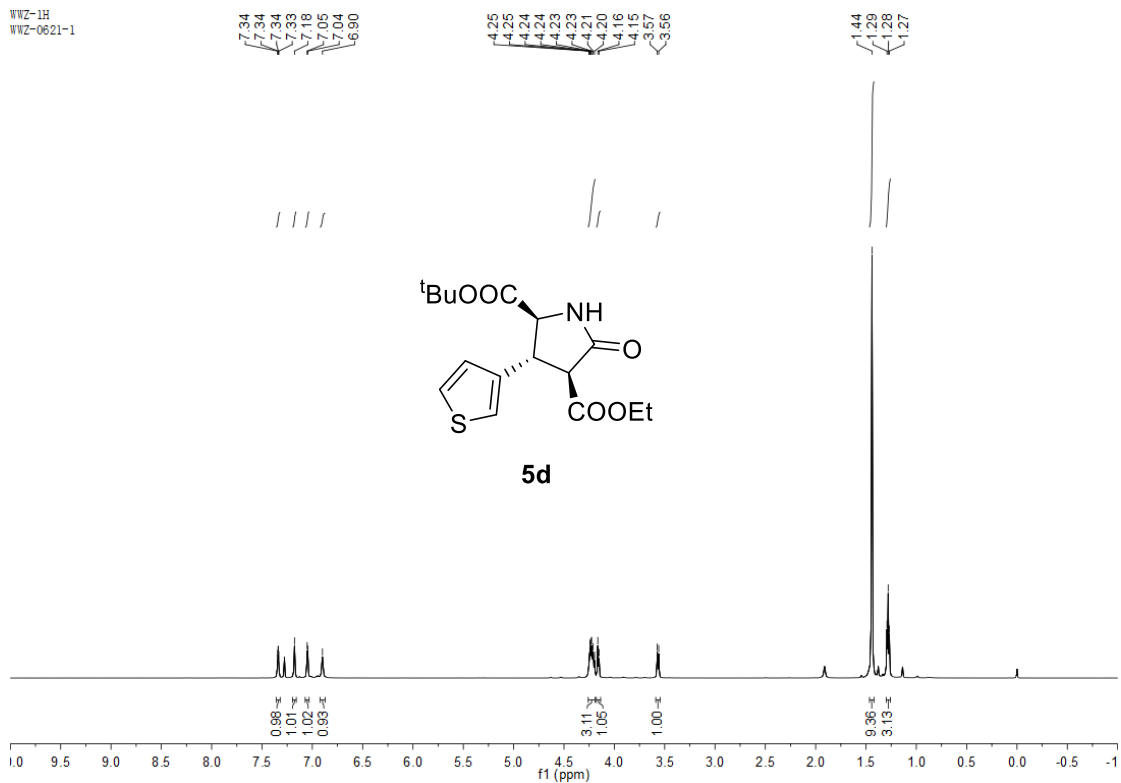

WWZ-13C  
WWZ-0621-1

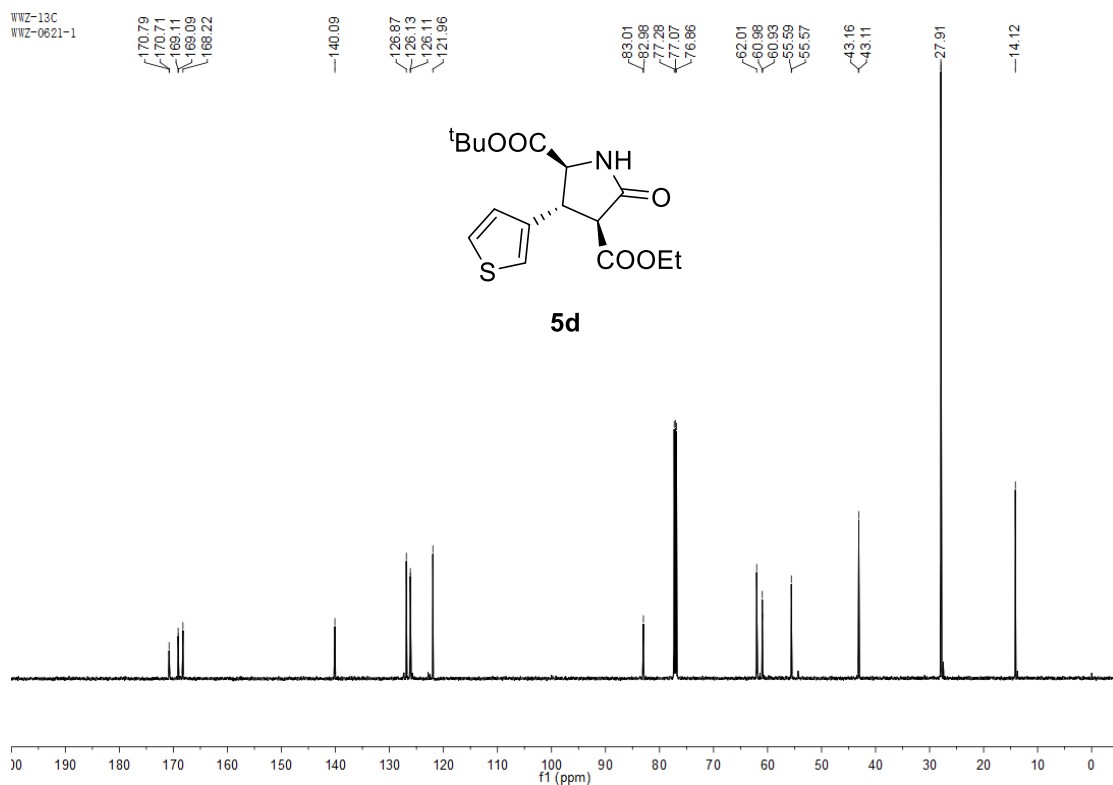

WWZ-1H  
WWZ-0621-2

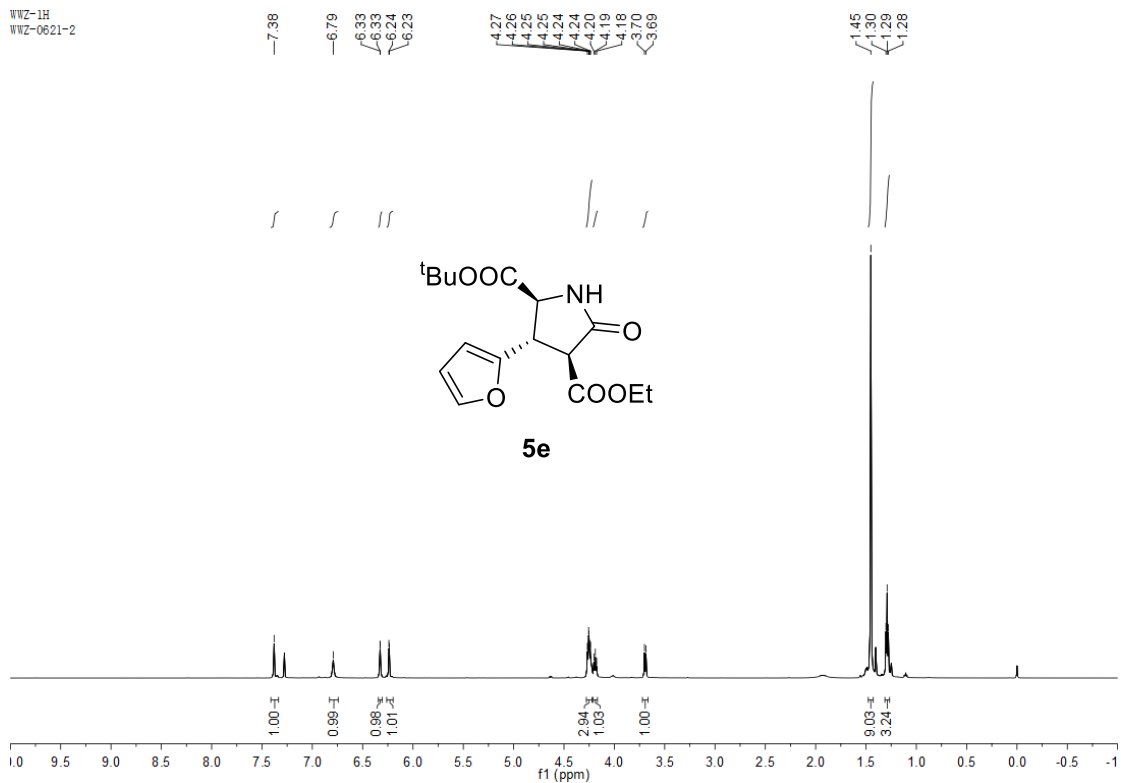

WWZ-13C  
WWZ-0621-2

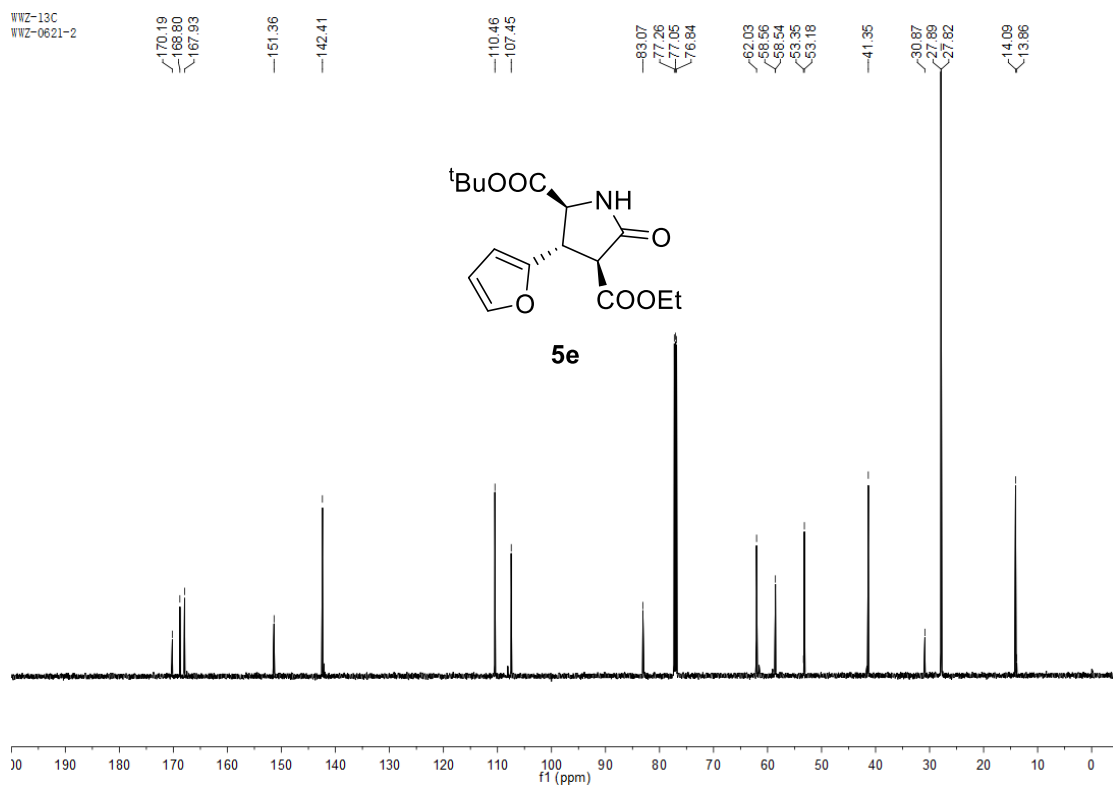

WWZ-1H  
WWZ-0613-1

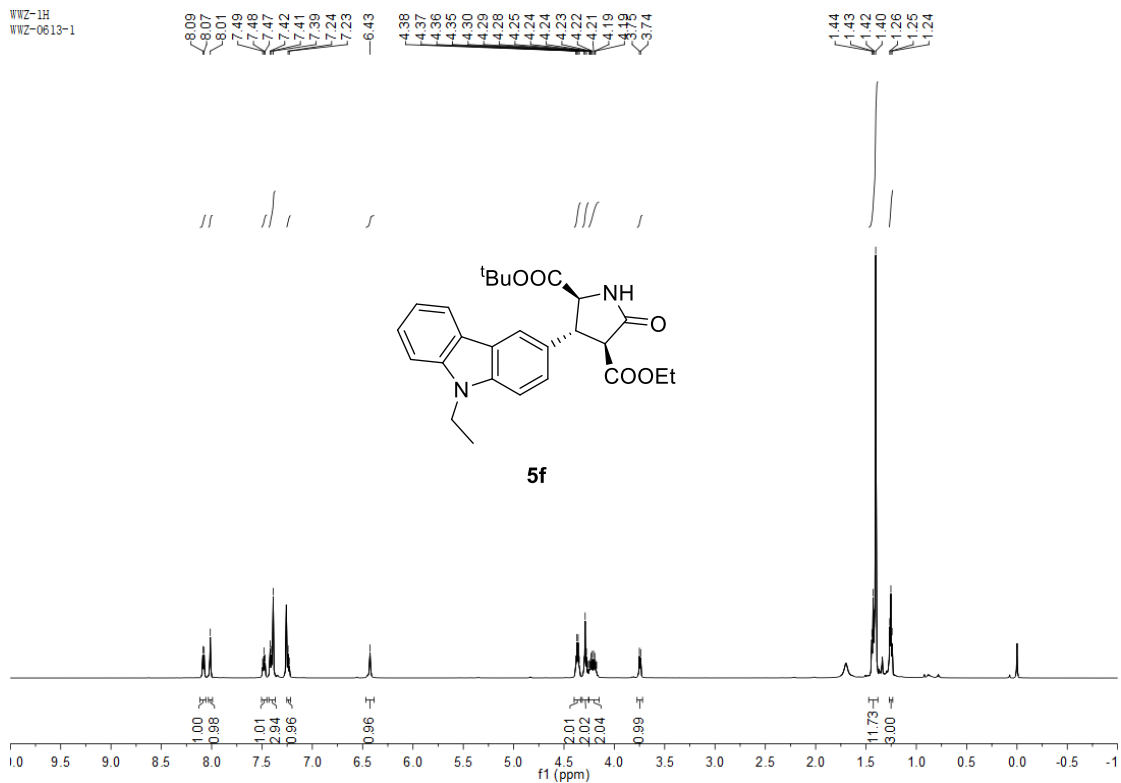

WWZ-13C  
WWZ-0613-1

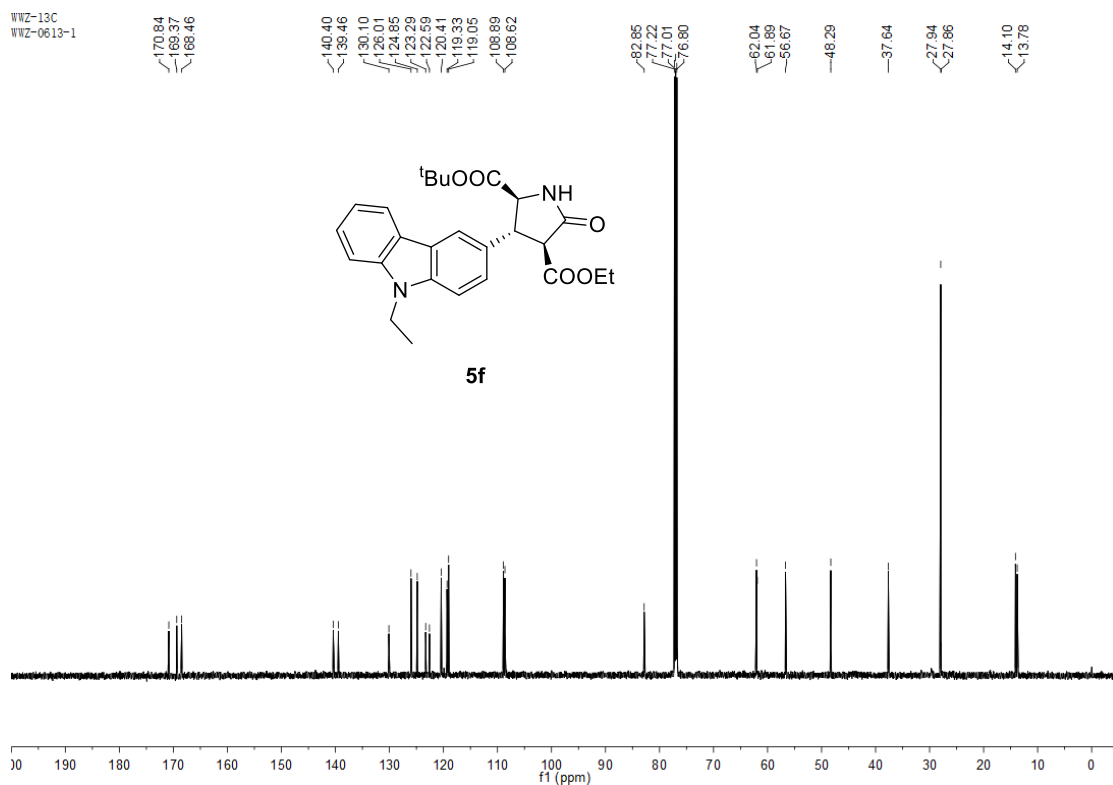

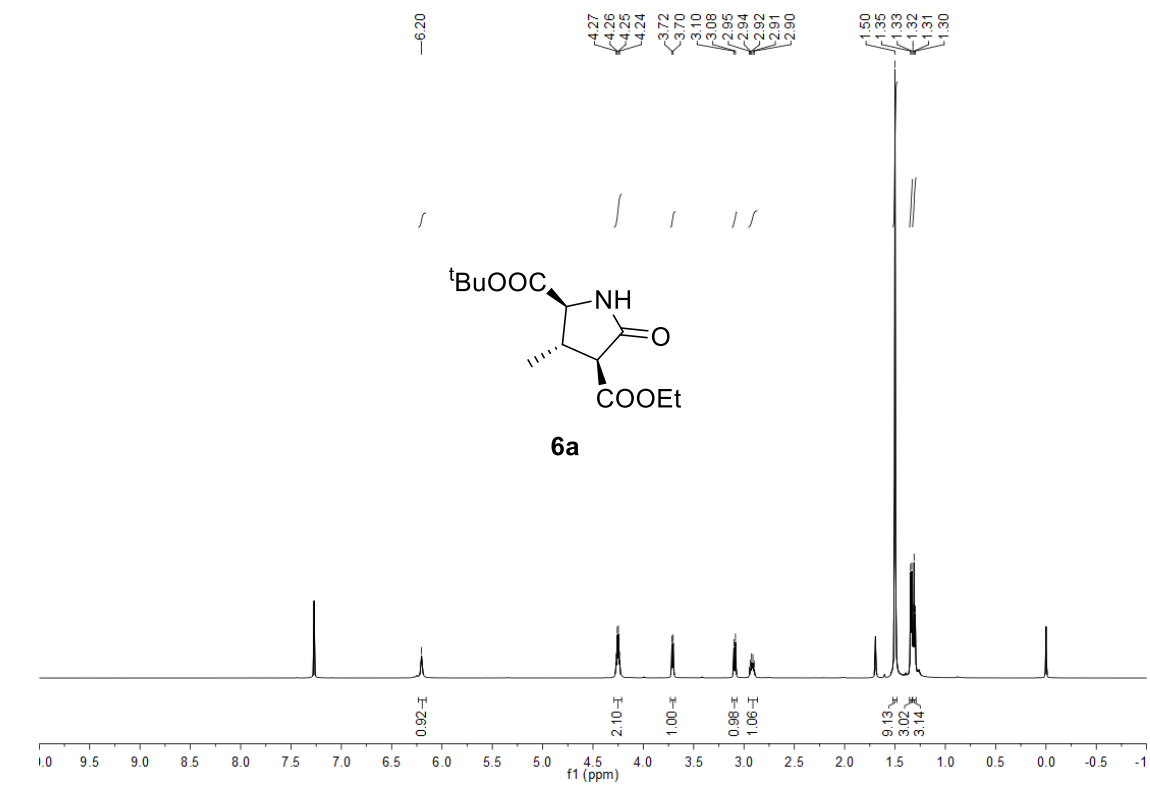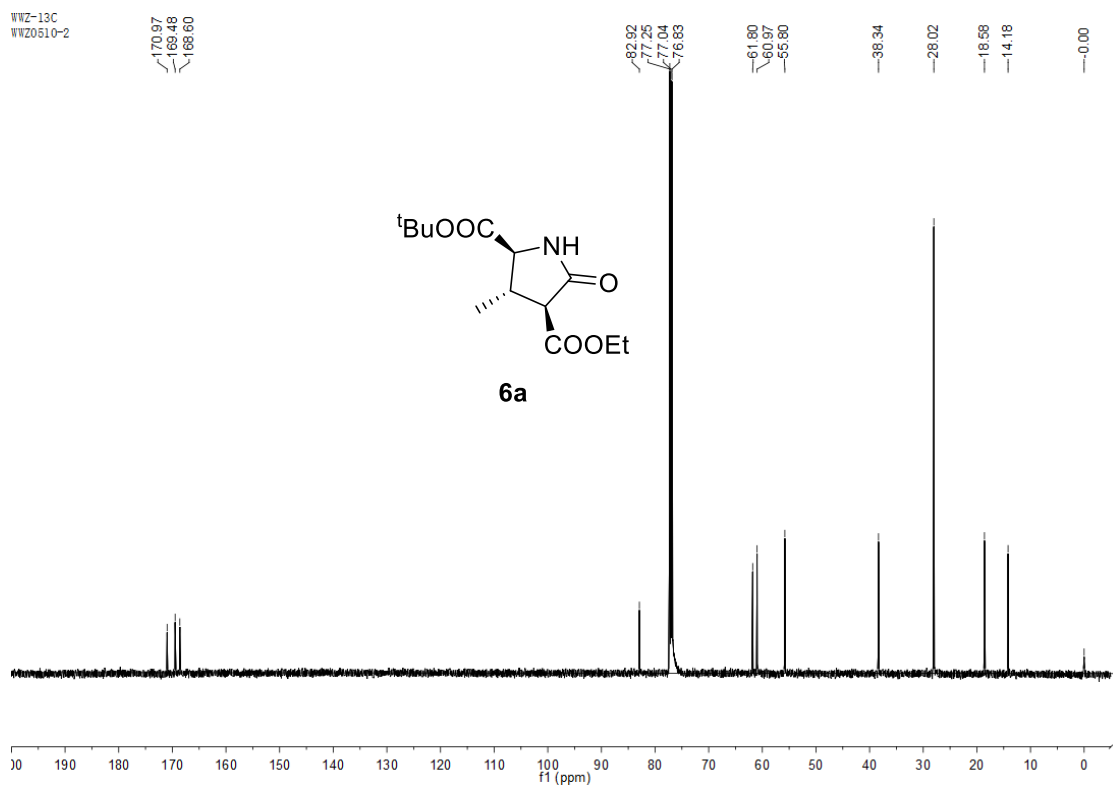



NWZ-1H  
wwz-0720-2

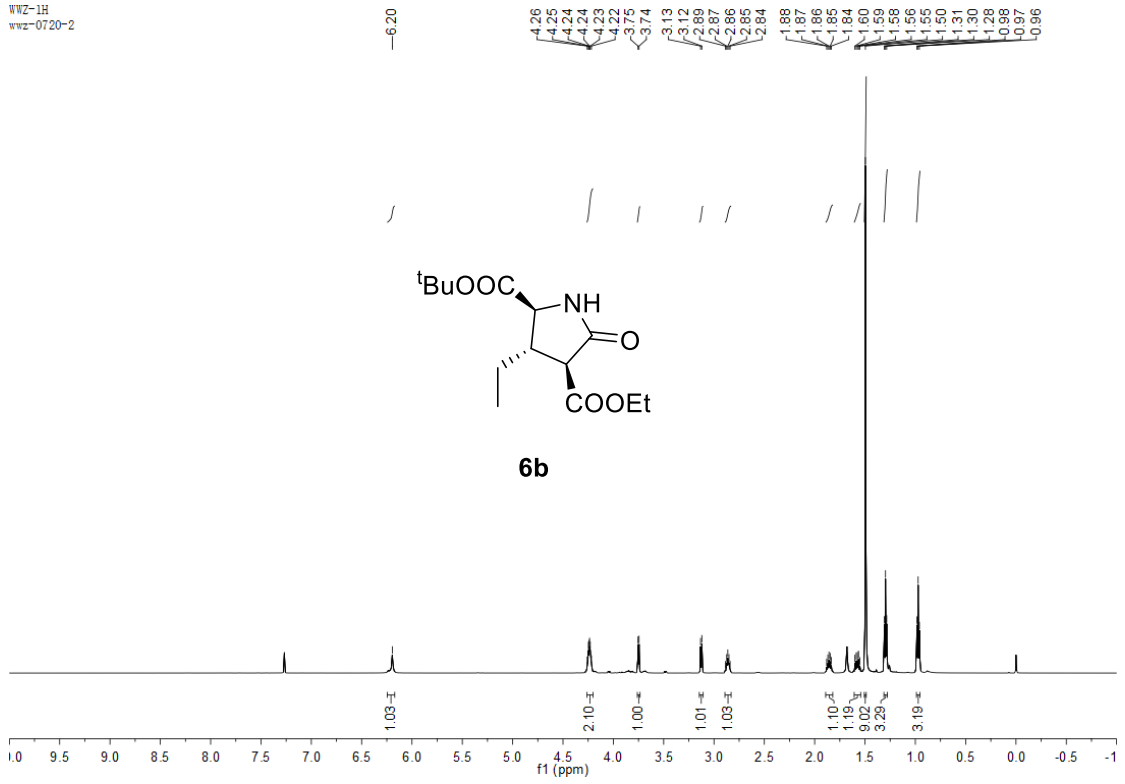

0720-2正丙醇缩合  
wwz-0720-2

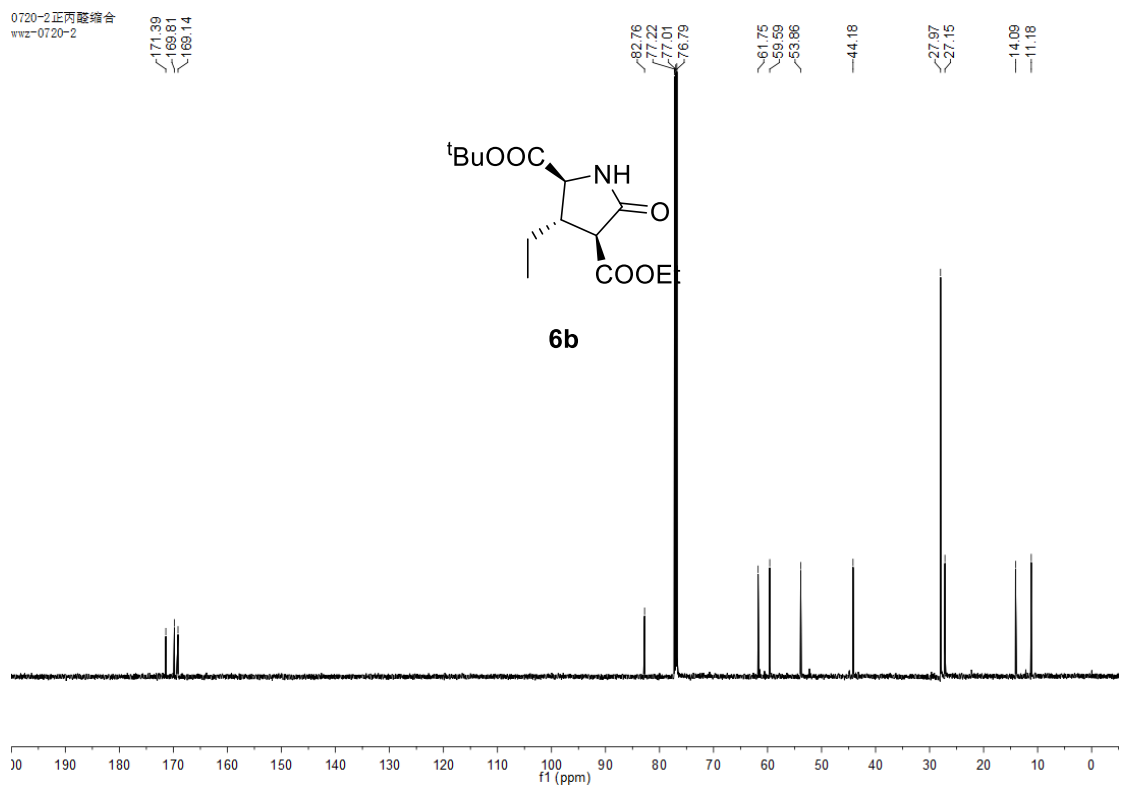

WWZ-1H  
WWZ-0714-2

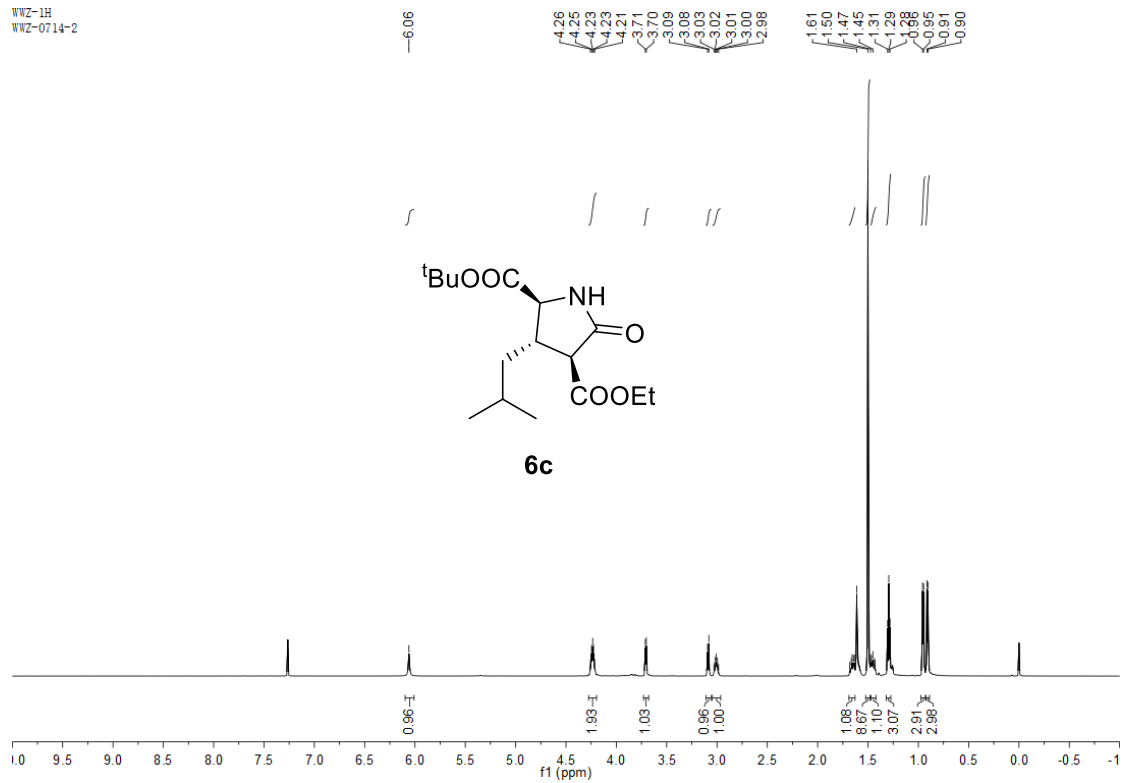

WWZ-13C  
WWZ-0709-2

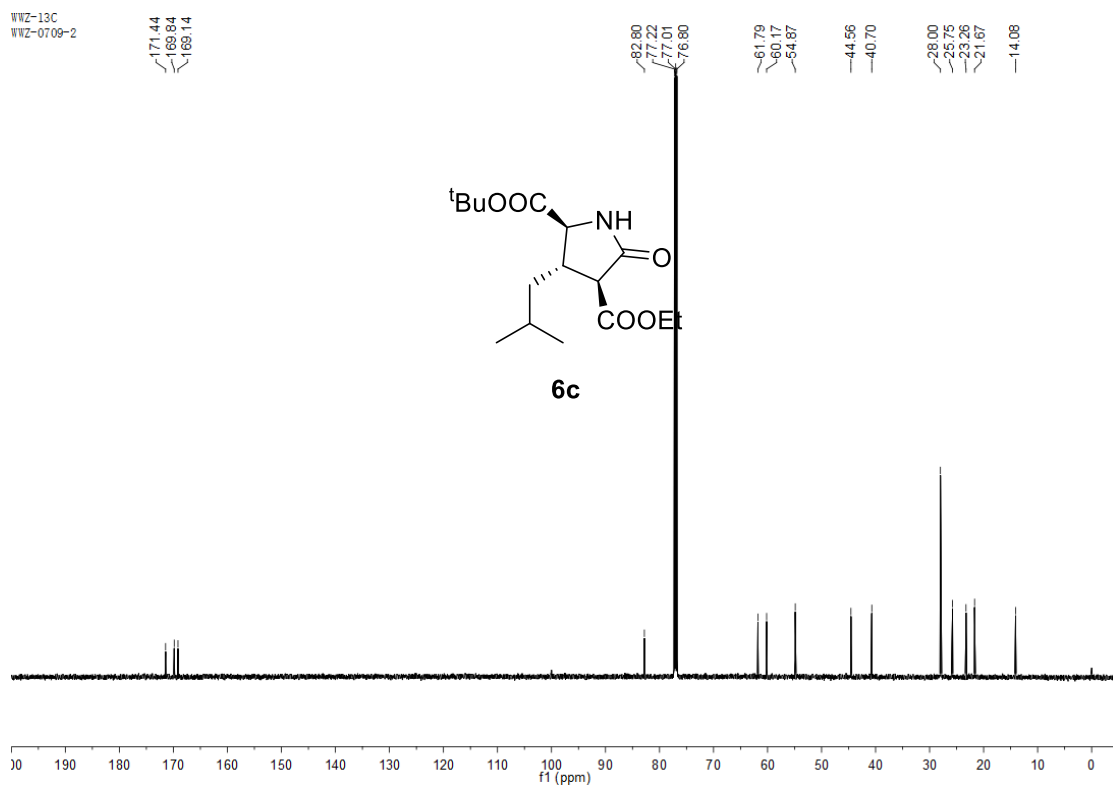

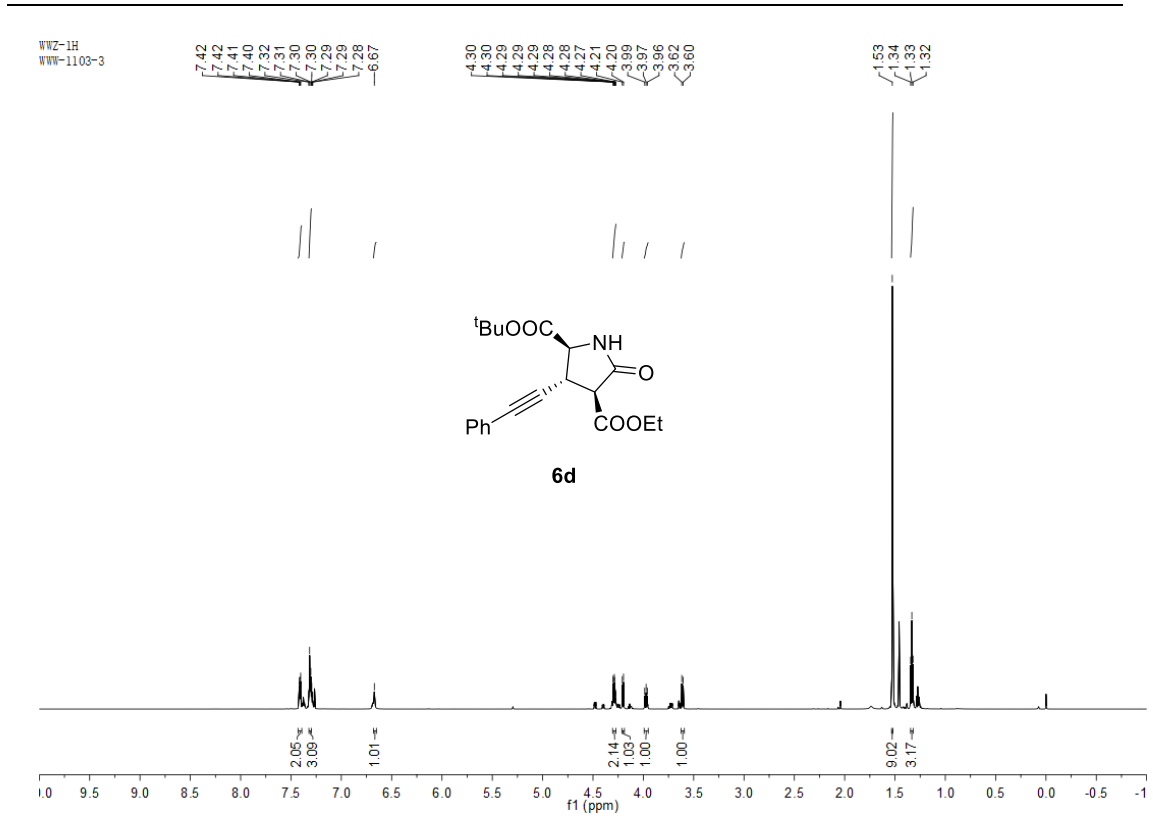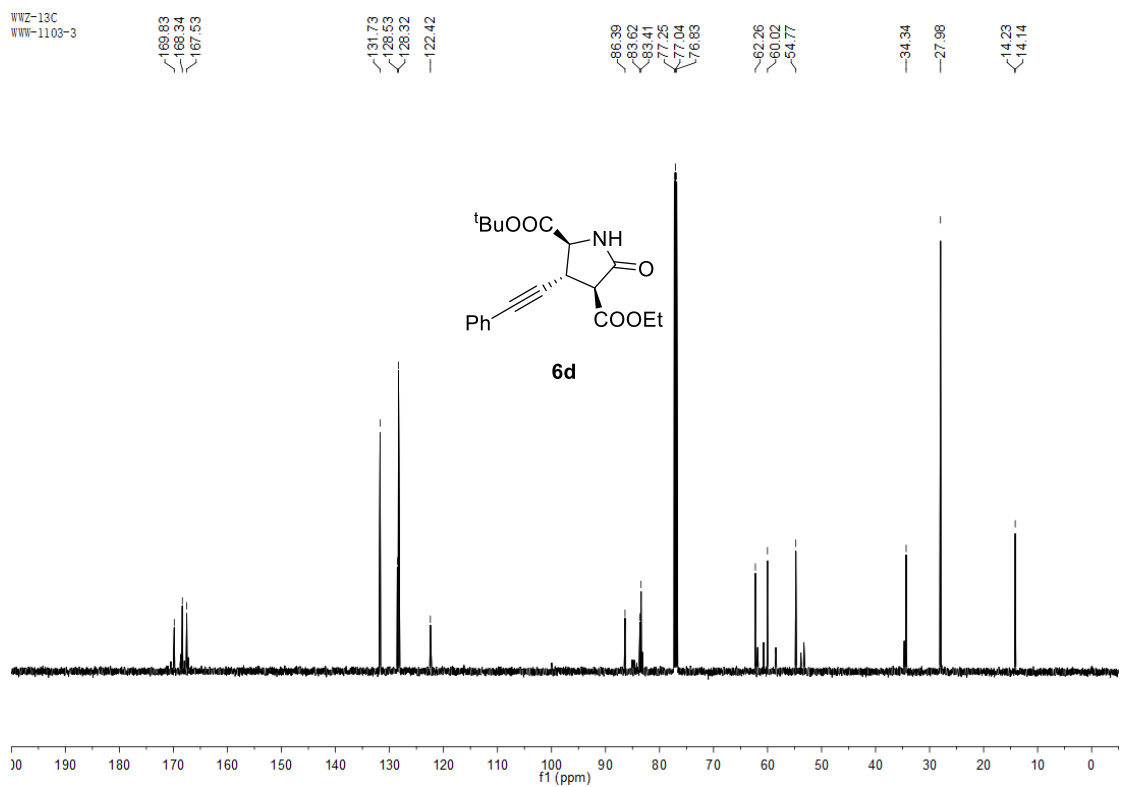

WWZ-1H  
WWZ-1101-2-3

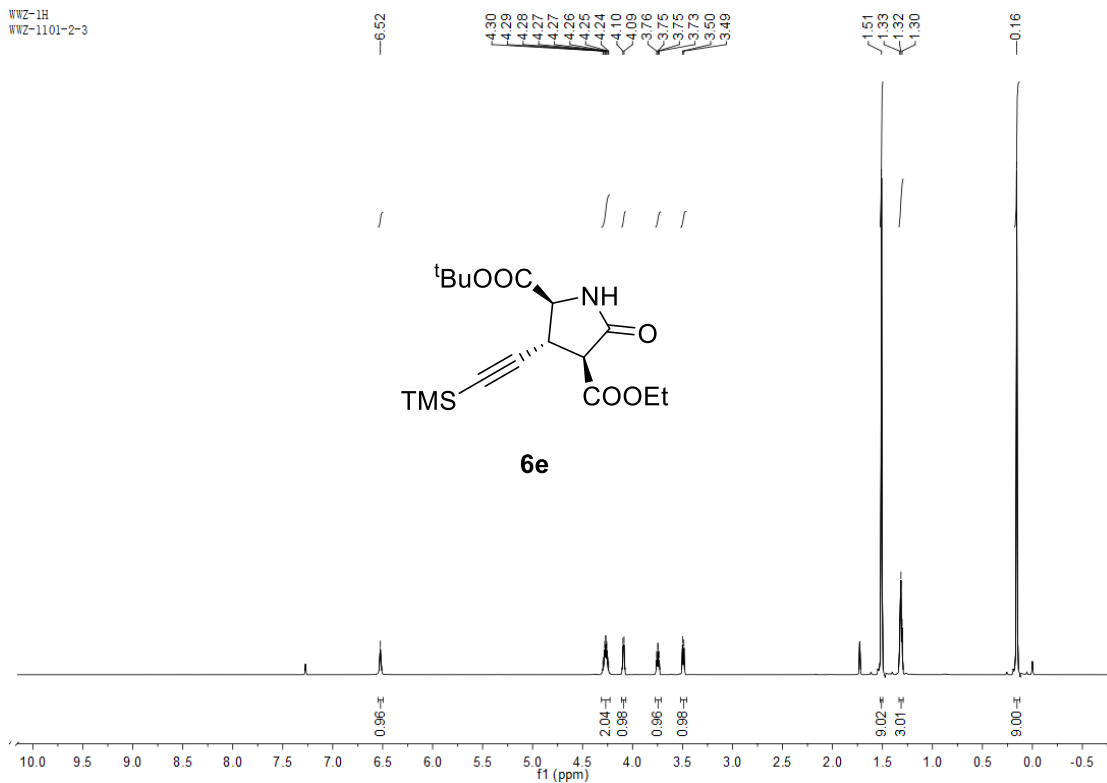

WWZ-13C  
WWZ-1101-2-3

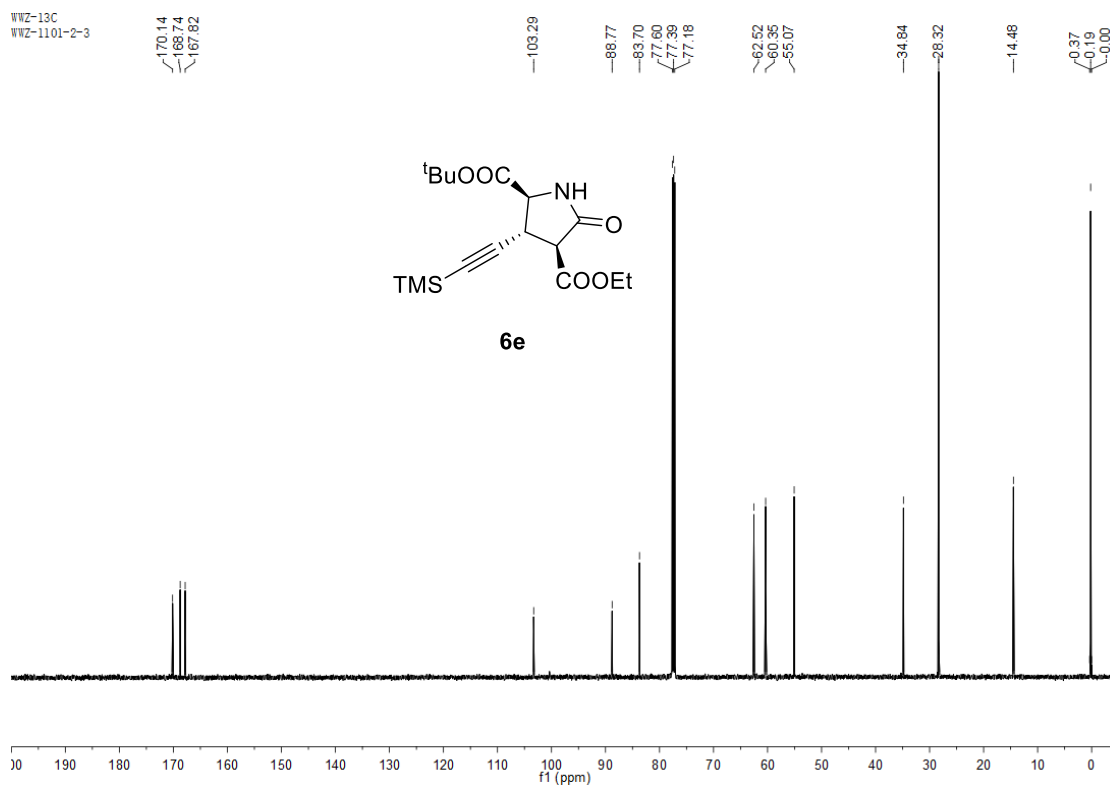

Supplement: d1qo01923f1.pdf [file d1qo01923f1.pdf]
